# Supplementary material for: The Numerical Predominance and Large Transcriptome Differences of Neutrophils in Peripheral Blood Together Inevitably Account for a Reported Pulmonary Tuberculosis Signature
Source: Int J Genomics. 2017 Feb 6;2017:5830971. doi: 10.1155/2017/5830971 (PMC5317119; doi:10.1155/2017/5830971)
Supplement: Supplementary file 1 — Supplementary Table 1: List of differently expressed genes in relevant group-group comparisons provided to complement Figure 4. The genes listed all had adjusted P = 0.01 and log2 (fold change) = −1 or = 1. [file 5830971.f1.xls]

## Sheet: Sheet1
Probe ID	Entrez Gene ID	Genes Symbol	pTeS_PTB(whole genome) Vs. pTeS_HC(whole genome) (Up)	pTeS_PTB(whole genome) Vs. pTeS_HC(whole genome) (Dn)	pTeS_CD4::Neut_PTB(whole genome) Vs. pTeS_CD4::Neut_HC(whole genome) (Up)	pTeS_CD4::Neut_PTB(whole genome) Vs. pTeS_CD4::Neut_HC(whole genome) (Dn)	pTeS_CD8::Neut_PTB(whole genome) Vs. pTeS_CD8::Neut_HC(whole genome) (Up)	pTeS_CD8::Neut_PTB(whole genome) Vs. pTeS_CD8::Neut_HC(whole genome) (Dn)	pTeS_Mono::Neut_PTB(whole genome) Vs. pTeS_Mono::Neut_HC(whole genome) (Up)	pTeS_Mono::Neut_PTB(whole genome) Vs. pTeS_Mono::Neut_HC(whole genome) (Dn)	TeS_CD4_PTB(whole genome) Vs. TeS_CD4_HC(whole genome) (Up)	TeS_CD4_PTB(whole genome) Vs. TeS_CD4_HC(whole genome) (Dn)	TeS_CD8_PTB(whole genome) Vs. TeS_CD8_HC(whole genome) (Up)	TeS_CD8_PTB(whole genome) Vs. TeS_CD8_HC(whole genome) (Dn)	TeS_Mono_PTB(whole genome) Vs. TeS_Mono_HC(whole genome) (Up)	TeS_Mono_PTB(whole genome) Vs. TeS_Mono_HC(whole genome) (Dn)	TeS_Neut_PTB(whole genome) Vs. TeS_Neut_HC(whole genome) (Up)	TeS_Neut_PTB(whole genome) Vs. TeS_Neut_HC(whole genome) (Dn)
ILMN_1343291	1915	EEF1A1	s	ns	ns	ns	ns	ns	ns	s	ns	s	ns	s	ns	s	ns	s
ILMN_1343295	2597	GAPDH	ns	s	ns	ns	ns	ns	ns	s	ns	ns	ns	ns	ns	s	ns	s
ILMN_1651278	79753	SNIP1	s	ns	ns	ns	ns	ns	ns	s	ns	ns	ns	ns	ns	ns	ns	s
ILMN_1651316	969	CD69	s	ns	ns	ns	ns	ns	ns	s	ns	ns	ns	ns	ns	ns	ns	s
ILMN_1651433	1633	DCK	ns	ns	ns	ns	ns	ns	ns	ns	ns	ns	ns	ns	ns	ns	ns	s
ILMN_1651438	161882	ZFPM1	s	ns	ns	ns	ns	ns	ns	s	ns	ns	ns	ns	ns	ns	ns	s
ILMN_1651490	1592	CYP26A1	ns	s	ns	ns	ns	ns	ns	ns	ns	ns	ns	ns	ns	ns	ns	s
ILMN_1651507	642732	LOC642732	s	ns	ns	ns	ns	ns	ns	s	ns	ns	ns	ns	ns	ns	ns	s
ILMN_1651628	54536	EXOC6	ns	s	ns	ns	ns	ns	ns	s	ns	ns	ns	ns	ns	ns	ns	s
ILMN_1651692	6793	STK10	ns	s	ns	ns	ns	ns	s	ns	ns	ns	ns	ns	ns	ns	ns	s
ILMN_1651752	80231	CXorf21	s	ns	ns	ns	ns	ns	ns	ns	ns	ns	ns	ns	ns	ns	ns	s
ILMN_1651767	57591	MKL1	ns	s	ns	ns	ns	ns	ns	ns	ns	ns	ns	ns	ns	ns	ns	s
ILMN_1651800	2948	GSTM4	ns	s	ns	ns	ns	ns	ns	s	ns	ns	ns	ns	ns	ns	ns	s
ILMN_1651826	10409	BASP1	s	ns	ns	ns	ns	ns	ns	s	ns	ns	ns	ns	ns	ns	ns	s
ILMN_1651832	10938	EHD1	ns	s	ns	ns	ns	ns	ns	s	ns	ns	ns	ns	ns	ns	ns	s
ILMN_1651850	6217	RPS16	s	ns	ns	ns	ns	ns	ns	s	ns	ns	ns	ns	ns	ns	ns	s
ILMN_1651949	57147	SCYL3	ns	s	ns	ns	ns	ns	ns	ns	ns	ns	ns	ns	ns	ns	ns	s
ILMN_1652006	8243	SMC1A	ns	s	ns	ns	ns	ns	ns	s	ns	ns	ns	ns	ns	ns	ns	s
ILMN_1652024	1456	CSNK1G3	ns	s	ns	ns	ns	ns	ns	ns	ns	ns	ns	ns	ns	ns	ns	s
ILMN_1652128	55788	LMBRD1	ns	s	ns	ns	ns	ns	ns	ns	ns	ns	ns	ns	ns	s	ns	s
ILMN_1652147	84545	MRPL43	s	ns	ns	ns	ns	ns	ns	s	ns	ns	ns	ns	ns	ns	ns	s
ILMN_1652161	25953	PNKD	ns	s	ns	ns	ns	ns	ns	s	ns	ns	ns	ns	ns	ns	ns	s
ILMN_1652198	83605	CCM2	ns	s	ns	ns	ns	ns	ns	s	ns	ns	ns	ns	ns	ns	ns	s
ILMN_1652215	644310	LOC644310	ns	s	ns	ns	ns	ns	ns	s	s	ns	ns	ns	ns	ns	ns	s
ILMN_1652223	29062	WDR91	s	ns	ns	ns	ns	ns	ns	s	ns	ns	ns	ns	ns	ns	ns	s
ILMN_1652237	874	CBR3	ns	s	ns	ns	ns	ns	ns	s	ns	ns	ns	ns	ns	ns	ns	s
ILMN_1652280	114907	FBXO32	ns	s	ns	ns	ns	ns	s	ns	ns	ns	ns	ns	ns	ns	ns	s
ILMN_1652331	54442	KCTD5	ns	s	ns	ns	ns	ns	ns	s	ns	ns	ns	ns	ns	ns	ns	s
ILMN_1652333	79672	FN3KRP	ns	s	ns	ns	ns	ns	ns	s	ns	ns	ns	ns	ns	ns	ns	s
ILMN_1652357	8050	PDHX	ns	s	ns	ns	ns	ns	ns	ns	ns	ns	ns	ns	ns	ns	ns	s
ILMN_1652381	8778	SIGLEC5	s	ns	ns	ns	ns	ns	ns	s	ns	ns	ns	ns	ns	s	ns	s
ILMN_1652394	5862	RAB2A	s	ns	ns	ns	ns	ns	ns	s	ns	ns	ns	ns	ns	s	ns	s
ILMN_1652412	5257	PHKB	ns	ns	ns	ns	ns	ns	ns	s	ns	ns	ns	ns	s	ns	ns	s
ILMN_1652431	759	CA1	s	ns	ns	ns	ns	ns	ns	ns	ns	ns	ns	ns	ns	ns	ns	s
ILMN_1652525	89853	FAM125B	ns	s	ns	ns	ns	ns	ns	s	ns	ns	ns	ns	ns	ns	ns	s
ILMN_1652540	285613	RELL2	s	ns	ns	ns	ns	ns	ns	s	ns	ns	s	ns	ns	ns	ns	s
ILMN_1652638	116064	LRRC58	s	ns	ns	ns	ns	ns	s	ns	ns	ns	ns	ns	ns	ns	ns	s
ILMN_1652677	375061	FAM89A	ns	s	ns	ns	ns	ns	ns	ns	ns	ns	ns	ns	ns	ns	ns	s
ILMN_1652722	9556	C14orf2	s	ns	ns	ns	ns	ns	ns	ns	ns	ns	ns	ns	ns	ns	ns	s
ILMN_1652846	5833	PCYT2	s	ns	ns	ns	ns	ns	ns	s	ns	ns	ns	ns	ns	ns	ns	s
ILMN_1653794	387066	C6orf160	s	ns	ns	ns	ns	ns	ns	ns	ns	ns	ns	ns	ns	s	ns	s
ILMN_1653876	51324	SPG21	ns	s	ns	ns	ns	ns	ns	ns	ns	ns	ns	ns	ns	ns	ns	s
ILMN_1654032	10444	ZER1	ns	s	ns	ns	ns	ns	ns	ns	ns	ns	ns	ns	ns	ns	ns	s
ILMN_1654068	4521	NUDT1	s	ns	ns	ns	ns	ns	ns	ns	ns	ns	ns	ns	s	ns	ns	s
ILMN_1654414	2181	ACSL3	ns	ns	ns	ns	ns	ns	ns	ns	ns	s	ns	ns	ns	ns	ns	s
ILMN_1654422	88	ACTN2	ns	s	ns	ns	ns	ns	ns	ns	ns	ns	ns	ns	ns	ns	ns	s
ILMN_1654457	25828	TXN2	ns	ns	ns	ns	ns	ns	ns	ns	ns	ns	ns	ns	ns	ns	ns	s
ILMN_1654541	534	ATP6V1G2	ns	ns	ns	ns	ns	ns	ns	ns	ns	ns	ns	ns	ns	ns	ns	s
ILMN_1654563	1947	EFNB1	s	ns	ns	ns	ns	ns	ns	ns	ns	ns	ns	ns	ns	ns	ns	s
ILMN_1654583	1105	CHD1	s	ns	ns	ns	ns	ns	ns	ns	ns	ns	ns	ns	ns	ns	ns	s
ILMN_1654612	51385	ZNF589	ns	s	ns	ns	ns	ns	ns	ns	ns	ns	ns	ns	ns	ns	ns	s
ILMN_1654854	347273	MURC	ns	s	ns	ns	ns	ns	ns	ns	ns	ns	ns	ns	ns	ns	ns	s
ILMN_1655137	23318	ZCCHC11	ns	s	ns	ns	ns	ns	ns	ns	ns	ns	ns	ns	ns	ns	ns	s
ILMN_1655154	5725	PTBP1	ns	s	ns	ns	ns	ns	ns	ns	ns	ns	ns	ns	ns	ns	ns	s
ILMN_1655167	91392	ZNF502	s	ns	ns	ns	ns	ns	ns	ns	ns	ns	ns	ns	ns	ns	ns	s
ILMN_1655190	649044	LOC649044	ns	s	ns	ns	ns	ns	ns	ns	ns	ns	ns	ns	ns	ns	ns	s
ILMN_1655296	7402	UTRN	ns	s	ns	ns	ns	ns	ns	ns	ns	ns	ns	ns	ns	ns	ns	s
ILMN_1655422	6139	RPL17	ns	s	ns	ns	ns	ns	ns	ns	ns	ns	ns	ns	ns	ns	ns	s
ILMN_1655428	442711	LOC442711	s	ns	ns	ns	ns	ns	ns	ns	ns	ns	ns	ns	ns	ns	ns	s
ILMN_1655482	5987	TRIM27	ns	s	ns	ns	ns	ns	ns	ns	ns	ns	ns	ns	ns	ns	ns	s
ILMN_1655485	83932	C1orf124	ns	s	ns	ns	ns	ns	ns	ns	ns	ns	ns	ns	ns	ns	ns	s
ILMN_1655563	9811	KIAA0427	s	ns	ns	ns	ns	ns	ns	ns	ns	ns	ns	ns	ns	ns	ns	s
ILMN_1655595	5270	SERPINE2	s	ns	ns	ns	ns	ns	ns	ns	ns	ns	ns	ns	ns	ns	ns	s
ILMN_1655733	5982	RFC2	ns	s	ns	ns	ns	ns	ns	ns	ns	ns	ns	ns	ns	ns	ns	s
ILMN_1655765	54460	MRPS21	s	ns	ns	ns	ns	ns	ns	ns	ns	ns	ns	ns	ns	ns	ns	s
ILMN_1655867	57110	HRASLS	s	ns	ns	ns	ns	ns	ns	ns	ns	ns	ns	ns	ns	ns	ns	s
ILMN_1655983	8556	CDC14A	s	ns	ns	ns	ns	ns	ns	ns	ns	ns	ns	ns	ns	ns	ns	s
ILMN_1656134	29883	CNOT7	ns	s	ns	ns	ns	ns	ns	ns	ns	ns	ns	ns	ns	ns	ns	s
ILMN_1656199	650759	LOC650759	s	ns	ns	ns	ns	ns	ns	ns	ns	ns	ns	ns	ns	ns	ns	s
ILMN_1656254	388677	NOTCH2NL	s	ns	ns	ns	ns	ns	ns	ns	ns	ns	ns	ns	ns	ns	ns	s
ILMN_1656274	84950	PRPF38A	s	ns	ns	ns	ns	ns	ns	ns	ns	ns	ns	ns	ns	ns	ns	s
ILMN_1656300	2675	GFRA2	s	ns	ns	ns	ns	ns	ns	ns	ns	ns	ns	ns	ns	ns	ns	s
ILMN_1656327	144423	GLT1D1	ns	ns	ns	ns	ns	ns	ns	ns	ns	ns	ns	ns	ns	ns	ns	s
ILMN_1656378	9397	NMT2	s	ns	ns	ns	ns	ns	ns	ns	ns	ns	ns	ns	ns	ns	ns	s
ILMN_1656382	552900	BOLA2	ns	s	ns	ns	ns	ns	ns	ns	ns	ns	ns	ns	ns	ns	ns	s
ILMN_1656427	79018	C17orf39	ns	s	ns	ns	ns	ns	ns	ns	ns	ns	ns	ns	ns	ns	ns	s
ILMN_1656496	26122	EPC2	ns	s	ns	ns	ns	ns	ns	ns	ns	ns	ns	ns	ns	ns	ns	s
ILMN_1656630	644891	LOC644891	ns	s	ns	ns	ns	ns	ns	ns	ns	ns	ns	ns	ns	ns	ns	s
ILMN_1656656	90639	COX19	s	ns	ns	ns	ns	ns	ns	ns	ns	ns	ns	ns	ns	ns	ns	s
ILMN_1656662	731365	LOC731365	ns	s	ns	ns	ns	ns	ns	ns	ns	ns	ns	ns	ns	ns	ns	s
ILMN_1656818	353345	GPR141	s	ns	ns	ns	ns	ns	ns	ns	ns	ns	ns	ns	ns	ns	ns	s
ILMN_1657283	54890	ALKBH5	ns	s	ns	ns	ns	ns	ns	ns	ns	ns	ns	ns	ns	ns	ns	s
ILMN_1657288	375513	GUSBL2	ns	s	ns	ns	ns	ns	ns	ns	ns	ns	ns	ns	ns	ns	ns	s
ILMN_1657515	9252	RPS6KA5	s	ns	ns	ns	ns	ns	ns	ns	ns	ns	ns	ns	ns	ns	ns	s
ILMN_1657527	387837	CLEC12B	s	ns	ns	ns	ns	ns	ns	ns	ns	ns	ns	ns	ns	ns	ns	s
ILMN_1657673	90120	LOC90120	s	ns	ns	ns	ns	ns	ns	ns	ns	ns	ns	ns	ns	ns	ns	s
ILMN_1657679	10451	VAV3	ns	ns	ns	ns	ns	ns	ns	ns	ns	ns	ns	ns	ns	ns	ns	s
ILMN_1657683	84886	C1orf198	s	ns	ns	ns	ns	ns	ns	ns	ns	ns	ns	ns	ns	ns	ns	s
ILMN_1657873	64328	XPO4	s	ns	ns	ns	ns	ns	ns	ns	ns	ns	ns	ns	ns	ns	ns	s
ILMN_1657949	6009	RHEB	s	ns	ns	ns	ns	ns	ns	ns	ns	ns	ns	ns	ns	ns	ns	s
ILMN_1657977	22921	MSRB2	ns	ns	ns	ns	ns	ns	ns	ns	ns	ns	ns	ns	ns	ns	ns	s
ILMN_1657996	642035	LOC642035	s	ns	ns	ns	ns	ns	ns	ns	ns	ns	ns	ns	ns	ns	ns	s
ILMN_1658016	128611	ZNF831	ns	s	ns	ns	ns	ns	ns	ns	ns	ns	ns	ns	ns	ns	ns	s
ILMN_1658243	23362	PSD3	s	ns	ns	ns	ns	ns	ns	ns	ns	ns	ns	ns	ns	ns	ns	s
ILMN_1658399	10219	KLRG1	s	ns	ns	ns	ns	ns	ns	ns	ns	ns	ns	ns	ns	ns	ns	s
ILMN_1658439	NA	FLJ13611	s	ns	ns	ns	ns	ns	ns	ns	ns	ns	ns	ns	ns	ns	ns	s
ILMN_1658460	653884	LOC653884	s	ns	ns	ns	ns	ns	ns	ns	ns	ns	ns	ns	ns	ns	ns	s
ILMN_1658472	51107	APH1A	s	ns	ns	ns	ns	ns	ns	ns	ns	ns	ns	ns	ns	ns	ns	s
ILMN_1658628	145200	C14orf72	ns	s	ns	ns	ns	ns	ns	ns	ns	ns	ns	ns	ns	ns	ns	s
ILMN_1658830	54838	C10orf26	s	ns	ns	ns	ns	ns	ns	ns	ns	ns	ns	ns	ns	ns	ns	s
ILMN_1658869	645401	LOC645401	s	ns	ns	ns	ns	ns	ns	ns	ns	ns	ns	ns	ns	ns	ns	s
ILMN_1658884	23200	ATP11B	s	ns	ns	ns	ns	ns	ns	ns	ns	ns	ns	ns	ns	ns	ns	s
ILMN_1658911	647349	LOC647349	ns	ns	ns	ns	ns	ns	ns	ns	ns	ns	ns	ns	ns	ns	ns	s
ILMN_1658978	650155	LOC650155	s	ns	ns	ns	ns	ns	ns	ns	ns	ns	ns	ns	ns	ns	ns	s
ILMN_1659437	84817	TXNDC17	ns	s	ns	ns	ns	ns	ns	ns	ns	ns	ns	ns	ns	ns	ns	s
ILMN_1659462	54935	DUSP23	s	ns	ns	ns	ns	ns	ns	ns	ns	ns	ns	ns	ns	ns	ns	s
ILMN_1659490	653158	LOC653158	ns	s	ns	ns	ns	ns	ns	ns	ns	ns	ns	ns	ns	ns	ns	s
ILMN_1659524	29078	C6orf66	s	ns	ns	ns	ns	ns	ns	ns	ns	ns	ns	ns	ns	ns	ns	s
ILMN_1659550	388654	LOC388654	s	ns	ns	ns	ns	ns	ns	ns	ns	ns	ns	ns	ns	ns	ns	s
ILMN_1659682	2585	GALK2	ns	s	ns	ns	ns	ns	ns	ns	ns	ns	ns	ns	ns	ns	ns	s
ILMN_1659786	54482	CCDC76	s	ns	ns	ns	ns	ns	ns	ns	ns	ns	ns	ns	ns	ns	ns	s
ILMN_1659895	4478	MSN	ns	s	ns	ns	ns	ns	ns	ns	ns	ns	ns	ns	ns	ns	ns	s
ILMN_1659913	3669	ISG20	ns	s	ns	ns	ns	ns	ns	ns	ns	ns	ns	ns	ns	ns	ns	s
ILMN_1659923	2776	GNAQ	s	ns	ns	ns	ns	ns	ns	ns	ns	ns	ns	ns	ns	ns	ns	s
ILMN_1660125	57713	SFMBT2	ns	s	ns	ns	ns	ns	ns	ns	ns	ns	ns	ns	ns	ns	ns	s
ILMN_1660199	10449	ACAA2	s	ns	ns	ns	ns	ns	ns	ns	ns	ns	ns	ns	ns	ns	ns	s
ILMN_1660320	644739	LOC644739	s	ns	ns	ns	ns	ns	ns	ns	ns	ns	ns	ns	ns	ns	ns	s
ILMN_1660436	3304	HSPA1B	ns	s	ns	ns	ns	ns	ns	ns	ns	ns	ns	ns	ns	ns	ns	s
ILMN_1660477	652608	LOC652608	ns	ns	ns	ns	ns	ns	ns	ns	ns	ns	ns	ns	ns	ns	ns	s
ILMN_1660837	1182	CLCN3	s	ns	ns	ns	ns	ns	ns	ns	ns	ns	ns	ns	ns	ns	ns	s
ILMN_1660852	376940	ZC3H6	s	ns	ns	ns	ns	ns	ns	ns	ns	ns	ns	ns	ns	ns	ns	s
ILMN_1660927	222234	MGC35361	ns	s	ns	ns	ns	ns	ns	ns	ns	ns	ns	ns	ns	ns	ns	s
ILMN_1660986	8863	PER3	ns	s	ns	ns	ns	ns	ns	ns	ns	ns	ns	ns	ns	ns	ns	s
ILMN_1661264	6472	SHMT2	s	ns	ns	ns	ns	ns	ns	ns	ns	ns	ns	ns	ns	ns	ns	s
ILMN_1661266	3119	HLA-DQB1	ns	ns	ns	ns	ns	ns	ns	ns	ns	ns	ns	ns	ns	ns	ns	s
ILMN_1661342	23157	2014-09-06	s	ns	ns	ns	ns	ns	ns	ns	ns	ns	ns	ns	ns	ns	ns	s
ILMN_1661492	92714	ARRDC1	s	ns	ns	ns	ns	ns	ns	ns	ns	ns	ns	ns	ns	ns	ns	s
ILMN_1661683	7067	THRA	s	ns	ns	ns	ns	ns	ns	ns	ns	ns	ns	ns	ns	ns	ns	s
ILMN_1661717	7027	TFDP1	ns	s	ns	ns	ns	ns	ns	ns	ns	ns	ns	ns	ns	ns	ns	s
ILMN_1661799	25994	HIGD1A	s	ns	ns	ns	ns	ns	ns	ns	ns	ns	ns	ns	ns	ns	ns	s
ILMN_1661917	644039	LOC644039	s	ns	ns	ns	ns	ns	ns	ns	ns	ns	ns	ns	ns	ns	ns	s
ILMN_1662026	695	BTK	s	ns	ns	ns	ns	ns	ns	ns	ns	ns	ns	ns	ns	ns	ns	s
ILMN_1662158	653147	LOC653147	ns	ns	ns	ns	ns	ns	ns	ns	ns	ns	ns	ns	ns	ns	ns	s
ILMN_1662294	650114	LOC650114	s	ns	ns	ns	ns	ns	ns	ns	ns	ns	ns	ns	ns	ns	ns	s
ILMN_1662316	65082	VPS33A	ns	ns	ns	ns	ns	ns	ns	ns	ns	ns	ns	ns	ns	ns	ns	s
ILMN_1662331	57107	PDSS2	ns	s	ns	ns	ns	ns	ns	ns	ns	ns	ns	ns	ns	ns	ns	s
ILMN_1662417	10128	LRPPRC	ns	s	ns	ns	ns	ns	ns	ns	ns	ns	ns	ns	ns	ns	ns	s
ILMN_1662578	56913	C1GALT1	ns	s	ns	ns	ns	ns	ns	ns	ns	ns	ns	ns	ns	ns	ns	s
ILMN_1662667	730920	LOC730920	ns	s	ns	ns	ns	ns	ns	ns	ns	ns	ns	ns	ns	ns	ns	s
ILMN_1662747	2123	EVI2A	ns	s	ns	ns	ns	ns	ns	ns	ns	ns	ns	ns	ns	ns	ns	s
ILMN_1662905	654364	NME1-NME2	ns	ns	ns	ns	ns	ns	ns	ns	ns	ns	ns	ns	ns	ns	ns	s
ILMN_1663158	7727	ZNF174	s	ns	ns	ns	ns	ns	ns	ns	ns	ns	ns	ns	ns	ns	ns	s
ILMN_1663220	29093	MRPL22	ns	s	ns	ns	ns	ns	ns	ns	ns	ns	ns	ns	ns	ns	ns	s
ILMN_1663263	284656	EPHA10	ns	s	ns	ns	ns	ns	ns	ns	ns	ns	ns	ns	ns	ns	ns	s
ILMN_1663313	278	AMY1C	s	ns	ns	ns	ns	ns	ns	ns	ns	ns	ns	ns	ns	ns	ns	s
ILMN_1663444	64130	LIN7B	ns	ns	ns	ns	ns	ns	ns	ns	ns	ns	ns	ns	ns	ns	ns	s
ILMN_1664167	84154	BXDC1	ns	s	ns	ns	ns	ns	ns	ns	ns	ns	ns	ns	ns	ns	ns	s
ILMN_1664231	10431	TIMM23	ns	s	ns	ns	ns	ns	ns	ns	ns	ns	ns	ns	ns	ns	ns	s
ILMN_1664323	51562	MBIP	ns	ns	ns	ns	ns	ns	ns	ns	ns	ns	ns	ns	ns	ns	ns	s
ILMN_1664644	89849	ATG16L2	ns	s	ns	ns	ns	ns	ns	ns	ns	ns	ns	ns	ns	ns	ns	s
ILMN_1664978	9414	TJP2	s	ns	ns	ns	ns	ns	ns	ns	ns	ns	ns	ns	ns	ns	ns	s
ILMN_1665123	349565	NMNAT3	s	ns	ns	ns	ns	ns	ns	ns	ns	ns	ns	ns	ns	ns	ns	s
ILMN_1665219	8425	LTBP4	ns	s	ns	ns	ns	ns	ns	ns	ns	ns	ns	ns	ns	ns	ns	s
ILMN_1665289	79701	FLJ22222	s	ns	ns	ns	ns	ns	ns	ns	ns	ns	ns	ns	ns	ns	ns	s
ILMN_1665655	51496	CTDSPL2	s	ns	ns	ns	ns	ns	ns	ns	ns	ns	ns	ns	ns	ns	ns	s
ILMN_1665781	390466	LOC390466	s	ns	ns	ns	ns	ns	ns	ns	ns	ns	ns	ns	ns	ns	ns	s
ILMN_1666019	23394	ADNP	ns	s	ns	ns	ns	ns	ns	ns	ns	ns	ns	ns	ns	ns	ns	s
ILMN_1666122	57493	HEG1	s	ns	ns	ns	ns	ns	ns	ns	ns	ns	ns	ns	ns	ns	ns	s
ILMN_1666376	81844	TRIM56	ns	ns	ns	ns	ns	ns	ns	ns	ns	ns	ns	ns	ns	ns	ns	s
ILMN_1666453	6788	STK3	ns	ns	ns	ns	ns	ns	ns	ns	ns	ns	ns	ns	ns	ns	ns	s
ILMN_1666560	8100	IFT88	s	ns	ns	ns	ns	ns	ns	ns	ns	ns	ns	ns	ns	ns	ns	s
ILMN_1666594	3394	IRF8	ns	s	ns	ns	ns	ns	ns	ns	ns	ns	ns	ns	ns	ns	ns	s
ILMN_1666648	55660	PRPF40A	ns	s	ns	ns	ns	ns	ns	ns	ns	ns	ns	ns	ns	ns	ns	s
ILMN_1666670	9978	RBX1	ns	ns	ns	ns	ns	ns	ns	ns	ns	ns	ns	ns	ns	ns	ns	s
ILMN_1666690	93953	ACRC	ns	s	ns	ns	ns	ns	ns	ns	ns	ns	ns	ns	ns	ns	ns	s
ILMN_1667086	26985	AP3M1	ns	ns	ns	ns	ns	ns	ns	ns	ns	ns	ns	ns	ns	ns	ns	s
ILMN_1667171	651881	LOC651881	ns	s	ns	ns	ns	ns	ns	ns	ns	ns	ns	ns	ns	ns	ns	s
ILMN_1667224	56833	SLAMF8	s	ns	ns	ns	ns	ns	ns	ns	ns	ns	ns	ns	ns	ns	ns	s
ILMN_1667298	201229	LOC201229	ns	ns	ns	ns	ns	ns	ns	ns	ns	ns	ns	ns	ns	ns	ns	s
ILMN_1667453	25988	MIZF	s	ns	ns	ns	ns	ns	ns	ns	ns	ns	ns	ns	ns	ns	ns	s
ILMN_1667748	341405	ANKRD33	ns	s	ns	ns	ns	ns	ns	ns	ns	ns	ns	ns	ns	ns	ns	s
ILMN_1667831	3216	HOXB6	ns	ns	ns	ns	ns	ns	ns	ns	ns	ns	ns	ns	ns	ns	ns	s
ILMN_1667840	123920	CMTM3	s	ns	ns	ns	ns	ns	ns	ns	ns	ns	ns	ns	ns	ns	ns	s
ILMN_1668039	2995	GYPC	s	ns	ns	ns	ns	ns	ns	ns	ns	ns	ns	ns	ns	ns	ns	s
ILMN_1668336	51104	FAM108B1	ns	s	ns	ns	ns	ns	ns	ns	ns	ns	ns	ns	ns	ns	ns	s
ILMN_1668484	57470	LRRC47	ns	s	ns	ns	ns	ns	ns	ns	ns	ns	ns	ns	ns	ns	ns	s
ILMN_1668861	732165	LOC732165	ns	s	ns	ns	ns	ns	ns	ns	ns	ns	ns	ns	ns	ns	ns	s
ILMN_1669177	79758	DHRS12	s	ns	ns	ns	ns	ns	ns	ns	ns	ns	ns	ns	ns	ns	ns	s
ILMN_1669447	149628	PYHIN1	s	ns	ns	ns	ns	ns	ns	ns	ns	ns	ns	ns	ns	ns	ns	s
ILMN_1669555	55578	FAM48A	ns	ns	ns	ns	ns	ns	ns	ns	ns	ns	ns	ns	ns	ns	ns	s
ILMN_1669592	51257	2014-03-02	ns	ns	ns	ns	ns	ns	ns	ns	ns	ns	ns	ns	ns	ns	ns	s
ILMN_1669607	5261	PHKG2	s	ns	ns	ns	ns	ns	ns	ns	ns	ns	ns	ns	ns	ns	ns	s
ILMN_1669617	2887	GRB10	ns	ns	ns	ns	ns	ns	ns	ns	ns	ns	ns	ns	ns	ns	ns	s
ILMN_1669700	3841	KPNA5	s	ns	ns	ns	ns	ns	ns	ns	ns	ns	ns	ns	ns	ns	ns	s
ILMN_1669772	4035	LRP1	ns	ns	ns	ns	ns	ns	ns	ns	ns	ns	ns	ns	ns	ns	ns	s
ILMN_1670008	201163	FLCN	s	ns	ns	ns	ns	ns	ns	ns	ns	ns	ns	ns	ns	ns	ns	s
ILMN_1670079	115209	OMA1	ns	s	ns	ns	ns	ns	ns	ns	ns	ns	ns	ns	ns	ns	ns	s
ILMN_1670304	727866	LOC727866	s	ns	ns	ns	ns	ns	ns	ns	ns	ns	ns	ns	ns	ns	ns	s
ILMN_1670506	9949	AMMECR1	ns	ns	ns	ns	ns	ns	ns	ns	ns	ns	ns	ns	ns	ns	ns	s
ILMN_1670769	55166	CENPQ	s	ns	ns	ns	ns	ns	ns	ns	ns	ns	ns	ns	ns	ns	ns	s
ILMN_1670998	6888	TALDO1	ns	s	ns	ns	ns	ns	ns	ns	ns	ns	ns	ns	ns	ns	ns	s
ILMN_1671055	146395	GSG1L	ns	ns	ns	ns	ns	ns	ns	ns	ns	ns	ns	ns	ns	ns	ns	s
ILMN_1671326	26523	EIF2C1	ns	s	ns	ns	ns	ns	ns	ns	ns	ns	ns	ns	ns	ns	ns	s
ILMN_1671374	28974	C19orf53	ns	s	ns	ns	ns	ns	ns	ns	ns	ns	ns	ns	ns	ns	ns	s
ILMN_1671387	285343	C3orf23	s	ns	ns	ns	ns	ns	ns	ns	ns	ns	ns	ns	ns	ns	ns	s
ILMN_1671427	6468	FBXW4	s	ns	ns	ns	ns	ns	ns	ns	ns	ns	ns	ns	ns	ns	ns	s
ILMN_1671583	23608	MKRN1	ns	s	ns	ns	ns	ns	ns	ns	ns	ns	ns	ns	ns	ns	ns	s
ILMN_1671603	90390	MED30	ns	ns	ns	ns	ns	ns	ns	ns	ns	ns	ns	ns	ns	ns	ns	s
ILMN_1672080	2063	NR2F6	ns	ns	ns	ns	ns	ns	ns	ns	ns	ns	ns	ns	ns	ns	ns	s
ILMN_1672575	116369	SLC26A8	ns	ns	ns	ns	ns	ns	ns	ns	ns	ns	ns	ns	ns	ns	ns	s
ILMN_1673215	5093	PCBP1	s	ns	ns	ns	ns	ns	ns	ns	ns	ns	ns	ns	ns	ns	ns	s
ILMN_1673409	84848	MGC16121	ns	ns	ns	ns	ns	ns	ns	ns	ns	ns	ns	ns	ns	ns	ns	s
ILMN_1673892	256356	GK5	s	ns	ns	ns	ns	ns	ns	ns	ns	ns	ns	ns	ns	ns	ns	s
ILMN_1673980	643669	LOC643669	ns	ns	ns	ns	ns	ns	ns	ns	ns	ns	ns	ns	ns	ns	ns	s
ILMN_1674151	145781	Gcom1	ns	ns	ns	ns	ns	ns	ns	ns	ns	ns	ns	ns	ns	ns	ns	s
ILMN_1674789	651738	LOC651738	ns	ns	ns	ns	ns	ns	ns	ns	ns	ns	ns	ns	ns	ns	ns	s
ILMN_1675421	389293	LOC389293	ns	ns	ns	ns	ns	ns	ns	ns	ns	ns	ns	ns	ns	ns	ns	s
ILMN_1676026	64949	MRPS26	s	ns	ns	ns	ns	ns	ns	ns	ns	ns	ns	ns	ns	ns	ns	s
ILMN_1676042	246	ALOX15	ns	ns	ns	ns	ns	ns	ns	ns	ns	ns	ns	ns	ns	ns	ns	s
ILMN_1676240	7697	ZNF138	ns	ns	ns	ns	ns	ns	ns	ns	ns	ns	ns	ns	ns	ns	ns	s
ILMN_1651229	9670	IPO13	s	ns	ns	ns	ns	ns	ns	ns	ns	ns	ns	ns	ns	ns	s	ns
ILMN_1651232	653113	LOC653113	ns	s	ns	ns	ns	ns	ns	ns	ns	ns	ns	ns	ns	ns	s	ns
ILMN_1651259	647115	FLJ36848	s	ns	ns	ns	ns	ns	ns	s	ns	ns	ns	ns	ns	s	s	ns
ILMN_1651262	3182	HNRNPAB	ns	s	ns	ns	ns	ns	ns	s	ns	ns	ns	s	ns	s	s	ns
ILMN_1651296	143666	LOC143666	ns	s	ns	ns	ns	ns	ns	ns	s	ns	ns	ns	ns	s	s	ns
ILMN_1651315	10362	HMG20B	s	ns	ns	ns	ns	ns	ns	s	ns	ns	ns	ns	ns	ns	s	ns
ILMN_1651341	NA	LOC401010	s	ns	ns	ns	ns	ns	ns	s	s	ns	ns	ns	ns	ns	s	ns
ILMN_1651346	353376	TICAM2	ns	s	ns	ns	ns	ns	ns	s	ns	ns	ns	ns	ns	ns	s	ns
ILMN_1651385	9927	MFN2	ns	s	ns	ns	ns	ns	s	ns	ns	ns	ns	ns	ns	ns	s	ns
ILMN_1651506	96764	NCOA6IP	ns	s	ns	ns	ns	ns	ns	s	ns	ns	ns	ns	ns	ns	s	ns
ILMN_1651610	730525	LOC730525	ns	s	ns	ns	ns	ns	s	ns	ns	ns	ns	ns	ns	ns	s	ns
ILMN_1651642	221914	GPC2	ns	s	ns	ns	ns	ns	ns	s	ns	ns	ns	ns	ns	ns	s	ns
ILMN_1651680	649150	LOC649150	ns	s	ns	ns	ns	ns	ns	ns	ns	ns	ns	ns	ns	ns	s	ns
ILMN_1651712	54033	RBM11	ns	s	ns	ns	ns	ns	ns	ns	ns	ns	ns	ns	ns	s	s	ns
ILMN_1651719	8720	MBTPS1	ns	s	ns	ns	ns	ns	ns	s	ns	ns	ns	ns	ns	ns	s	ns
ILMN_1651769	9765	ZFYVE16	s	ns	ns	ns	ns	ns	ns	s	ns	ns	ns	ns	ns	ns	s	ns
ILMN_1651788	4296	MAP3K11	ns	s	ns	ns	ns	ns	ns	s	ns	ns	ns	ns	ns	ns	s	ns
ILMN_1651819	63917	GALNT11	ns	s	ns	ns	ns	ns	ns	s	ns	s	ns	ns	ns	ns	s	ns
ILMN_1651828	7203	CCT3	s	ns	ns	ns	ns	ns	ns	s	ns	ns	ns	ns	ns	ns	s	ns
ILMN_1651987	154467	C6orf129	s	ns	ns	ns	ns	ns	ns	s	s	ns	ns	ns	ns	ns	s	ns
ILMN_1652003	2790	GNG10	s	ns	ns	ns	ns	ns	ns	s	ns	ns	ns	ns	ns	ns	s	ns
ILMN_1652065	3779	KCNMB1	s	ns	ns	ns	ns	ns	s	ns	ns	ns	ns	ns	s	ns	s	ns
ILMN_1652085	10199	MPHOSPH10	ns	s	ns	ns	ns	ns	ns	s	ns	s	ns	ns	ns	s	s	ns
ILMN_1652113	641989	LOC641989	ns	s	ns	ns	ns	ns	ns	ns	ns	ns	ns	ns	ns	ns	s	ns
ILMN_1652123	3150	HMGN1	s	ns	ns	ns	ns	ns	ns	s	ns	ns	ns	ns	ns	ns	s	ns
ILMN_1652230	647361	LOC647361	ns	s	ns	ns	ns	ns	ns	ns	ns	ns	ns	ns	ns	ns	s	ns
ILMN_1652306	84466	MEGF10	ns	s	ns	ns	ns	ns	ns	s	ns	ns	ns	ns	ns	ns	s	ns
ILMN_1652371	222223	KIAA1324L	ns	s	ns	ns	ns	ns	s	ns	ns	ns	ns	ns	ns	ns	s	ns
ILMN_1652407	23613	ZMYND8	s	ns	ns	ns	ns	ns	ns	s	ns	ns	ns	ns	ns	ns	s	ns
ILMN_1652533	29797	DKFZp434K191	s	ns	ns	ns	ns	ns	ns	ns	ns	ns	ns	ns	ns	ns	s	ns
ILMN_1652680	652616	LOC652616	ns	s	ns	ns	ns	ns	ns	s	ns	ns	ns	ns	ns	ns	s	ns
ILMN_1652694	9715	FAM131B	ns	s	ns	ns	ns	ns	ns	s	ns	ns	ns	ns	ns	ns	s	ns
ILMN_1652736	6197	RPS6KA3	ns	s	ns	ns	ns	ns	s	ns	ns	ns	ns	ns	ns	ns	s	ns
ILMN_1652763	389203	LOC389203	ns	s	ns	ns	ns	ns	ns	s	ns	ns	ns	ns	ns	ns	s	ns
ILMN_1652787	118788	PIK3AP1	ns	s	ns	ns	ns	ns	ns	s	ns	ns	ns	ns	ns	ns	s	ns
ILMN_1652806	522	ATP5J	s	ns	ns	ns	ns	ns	ns	ns	ns	ns	ns	s	ns	ns	s	ns
ILMN_1652825	3587	IL10RA	ns	s	ns	ns	ns	ns	ns	s	ns	ns	ns	ns	ns	ns	s	ns
ILMN_1652918	54509	RHOF	ns	ns	ns	ns	ns	ns	ns	ns	ns	ns	ns	ns	ns	ns	s	ns
ILMN_1652928	80228	ORAI2	ns	s	ns	ns	ns	ns	ns	s	ns	ns	ns	ns	ns	s	s	ns
ILMN_1652929	23126	POGZ	s	ns	ns	ns	ns	ns	ns	s	ns	ns	ns	ns	ns	ns	s	ns
ILMN_1653573	644846	LOC644846	ns	ns	ns	ns	ns	ns	ns	ns	ns	ns	ns	ns	ns	ns	s	ns
ILMN_1653601	646144	LOC646144	ns	s	ns	ns	ns	ns	ns	ns	ns	s	ns	ns	ns	ns	s	ns
ILMN_1653613	84720	PIGO	s	ns	ns	ns	ns	ns	ns	ns	ns	ns	ns	ns	ns	ns	s	ns
ILMN_1653814	NA	HBBP1	s	ns	ns	ns	ns	ns	ns	ns	ns	ns	ns	ns	ns	ns	s	ns
ILMN_1653861	22955	SCMH1	s	ns	ns	ns	ns	ns	ns	ns	ns	s	ns	ns	ns	ns	s	ns
ILMN_1653896	84126	ATRIP	ns	s	ns	ns	ns	ns	ns	ns	ns	ns	ns	ns	ns	ns	s	ns
ILMN_1654060	2872	MKNK2	s	ns	ns	ns	ns	ns	ns	ns	ns	ns	ns	ns	ns	ns	s	ns
ILMN_1654200	653489	LOC653489	s	ns	ns	ns	ns	ns	ns	ns	ns	ns	ns	ns	ns	ns	s	ns
ILMN_1654313	730995	LOC730995	ns	s	ns	ns	ns	ns	ns	ns	ns	ns	ns	ns	ns	ns	s	ns
ILMN_1654357	7572	ZNF24	ns	s	ns	ns	ns	ns	ns	ns	ns	ns	ns	ns	ns	ns	s	ns
ILMN_1654385	79754	ASB13	ns	s	ns	ns	ns	ns	ns	ns	ns	ns	ns	ns	ns	ns	s	ns
ILMN_1654441	4942	OAT	ns	s	ns	ns	ns	ns	ns	ns	ns	ns	ns	ns	ns	ns	s	ns
ILMN_1654493	649169	LOC649169	ns	ns	ns	ns	ns	ns	ns	ns	ns	ns	ns	ns	ns	ns	s	ns
ILMN_1654566	3305	HSPA1L	s	ns	ns	ns	ns	ns	ns	ns	ns	ns	ns	ns	ns	ns	s	ns
ILMN_1654571	23149	FCHO1	s	ns	ns	ns	ns	ns	ns	ns	ns	ns	ns	ns	ns	ns	s	ns
ILMN_1654653	3831	KLC1	s	ns	ns	ns	ns	ns	ns	ns	ns	ns	ns	ns	ns	ns	s	ns
ILMN_1654689	10168	ZNF197	s	ns	ns	ns	ns	ns	ns	ns	ns	ns	ns	ns	ns	ns	s	ns
ILMN_1654866	5903	RANBP2	ns	s	ns	ns	ns	ns	ns	ns	ns	ns	ns	ns	ns	ns	s	ns
ILMN_1654893	10066	SCAMP2	s	ns	ns	ns	ns	ns	ns	ns	ns	ns	ns	ns	ns	ns	s	ns
ILMN_1654920	3189	HNRPH3	ns	s	ns	ns	ns	ns	ns	ns	ns	ns	ns	ns	ns	ns	s	ns
ILMN_1654939	10959	TMED2	ns	s	ns	ns	ns	ns	ns	ns	ns	ns	ns	ns	ns	ns	s	ns
ILMN_1655051	85002	FAM86B1	ns	s	ns	ns	ns	ns	ns	ns	ns	ns	ns	ns	ns	ns	s	ns
ILMN_1655093	727773	LOC727773	ns	s	ns	ns	ns	ns	ns	ns	ns	ns	ns	ns	ns	ns	s	ns
ILMN_1655114	29	ABR	s	ns	ns	ns	ns	ns	ns	ns	ns	ns	ns	ns	ns	ns	s	ns
ILMN_1655418	826	CAPNS1	ns	s	ns	ns	ns	ns	ns	ns	ns	ns	ns	ns	ns	ns	s	ns
ILMN_1655608	23276	KLHL18	s	ns	ns	ns	ns	ns	ns	ns	ns	ns	ns	ns	ns	ns	s	ns
ILMN_1655710	642989	LOC642989	s	ns	ns	ns	ns	ns	ns	ns	ns	ns	ns	ns	ns	ns	s	ns
ILMN_1655766	340120	ANKRD34B	s	ns	ns	ns	ns	ns	ns	ns	ns	ns	ns	ns	ns	ns	s	ns
ILMN_1655796	115123	2014-03-03	s	ns	ns	ns	ns	ns	ns	ns	ns	ns	ns	ns	ns	ns	s	ns
ILMN_1655921	2960	GTF2E1	s	ns	ns	ns	ns	ns	ns	ns	ns	ns	ns	ns	ns	ns	s	ns
ILMN_1655924	51095	TRNT1	ns	ns	ns	ns	ns	ns	ns	ns	ns	ns	ns	ns	ns	ns	s	ns
ILMN_1656016	1660	DHX9	s	ns	ns	ns	ns	ns	ns	ns	ns	ns	ns	ns	ns	ns	s	ns
ILMN_1656042	79932	KIAA0319L	ns	s	ns	ns	ns	ns	ns	ns	ns	ns	ns	ns	ns	ns	s	ns
ILMN_1656136	6780	STAU1	ns	s	ns	ns	ns	ns	ns	ns	ns	ns	ns	ns	ns	ns	s	ns
ILMN_1656186	254428	SLC41A1	ns	s	ns	ns	ns	ns	ns	ns	ns	ns	ns	ns	ns	ns	s	ns
ILMN_1656233	NA	LOC389517	s	ns	ns	ns	ns	ns	ns	ns	ns	ns	ns	ns	ns	ns	s	ns
ILMN_1656292	388532	LOC388532	s	ns	ns	ns	ns	ns	ns	ns	ns	ns	ns	ns	ns	ns	s	ns
ILMN_1656335	6016	RIT1	ns	s	ns	ns	ns	ns	ns	ns	ns	ns	ns	ns	ns	ns	s	ns
ILMN_1656361	201175	LOC201175	s	ns	ns	ns	ns	ns	ns	ns	ns	ns	ns	ns	ns	ns	s	ns
ILMN_1656376	648256	LOC648256	ns	s	ns	ns	ns	ns	ns	ns	ns	ns	ns	ns	ns	ns	s	ns
ILMN_1656404	90987	ZNF251	s	ns	ns	ns	ns	ns	ns	ns	ns	ns	ns	ns	ns	ns	s	ns
ILMN_1656413	10269	ZMPSTE24	ns	s	ns	ns	ns	ns	ns	ns	ns	ns	ns	ns	ns	ns	s	ns
ILMN_1656415	1031	CDKN2C	ns	s	ns	ns	ns	ns	ns	ns	ns	ns	ns	ns	ns	ns	s	ns
ILMN_1656540	8607	RUVBL1	ns	s	ns	ns	ns	ns	ns	ns	ns	ns	ns	ns	ns	ns	s	ns
ILMN_1656574	84108	PCGF6	s	ns	ns	ns	ns	ns	ns	ns	ns	ns	ns	ns	ns	ns	s	ns
ILMN_1656670	3135	HLA-G	s	ns	ns	ns	ns	ns	ns	ns	ns	ns	ns	ns	ns	ns	s	ns
ILMN_1656682	51582	AZIN1	s	ns	ns	ns	ns	ns	ns	ns	ns	ns	ns	ns	ns	ns	s	ns
ILMN_1656691	26272	FBXO4	ns	s	ns	ns	ns	ns	ns	ns	ns	ns	ns	ns	ns	ns	s	ns
ILMN_1656791	6194	RPS6	s	ns	ns	ns	ns	ns	ns	ns	ns	ns	ns	ns	ns	ns	s	ns
ILMN_1656868	23117	LOC23117	s	ns	ns	ns	ns	ns	ns	ns	ns	ns	ns	ns	ns	ns	s	ns
ILMN_1656910	117854	TRIM6	s	ns	ns	ns	ns	ns	ns	ns	ns	ns	ns	ns	ns	ns	s	ns
ILMN_1656920	1396	CRIP1	ns	s	ns	ns	ns	ns	ns	ns	ns	ns	ns	ns	ns	ns	s	ns
ILMN_1656962	401019	LOC401019	ns	s	ns	ns	ns	ns	ns	ns	ns	ns	ns	ns	ns	ns	s	ns
ILMN_1656977	26275	HIBCH	s	ns	ns	ns	ns	ns	ns	ns	ns	ns	ns	ns	ns	ns	s	ns
ILMN_1657041	645165	LOC645165	ns	s	ns	ns	ns	ns	ns	ns	ns	ns	ns	ns	ns	ns	s	ns
ILMN_1657317	5439	POLR2J	s	ns	ns	ns	ns	ns	ns	ns	ns	ns	ns	ns	ns	ns	s	ns
ILMN_1657373	55214	LEPREL1	s	ns	ns	ns	ns	ns	ns	ns	ns	ns	ns	ns	ns	ns	s	ns
ILMN_1657455	1089	CEACAM4	ns	ns	ns	ns	ns	ns	ns	ns	ns	ns	ns	ns	ns	ns	s	ns
ILMN_1657550	4597	MVD	ns	s	ns	ns	ns	ns	ns	ns	ns	ns	ns	ns	ns	ns	s	ns
ILMN_1657632	9204	ZMYM6	ns	s	ns	ns	ns	ns	ns	ns	ns	ns	ns	ns	ns	ns	s	ns
ILMN_1657680	26112	CCDC69	s	ns	ns	ns	ns	ns	ns	ns	ns	ns	ns	ns	ns	ns	s	ns
ILMN_1657682	85476	GFM1	s	ns	ns	ns	ns	ns	ns	ns	ns	ns	ns	ns	ns	ns	s	ns
ILMN_1657771	200186	CRTC2	s	ns	ns	ns	ns	ns	ns	ns	ns	ns	ns	ns	ns	ns	s	ns
ILMN_1657796	3925	STMN1	ns	s	ns	ns	ns	ns	ns	ns	ns	ns	ns	ns	ns	ns	s	ns
ILMN_1657837	84524	ZC3H8	s	ns	ns	ns	ns	ns	ns	ns	ns	ns	ns	ns	ns	ns	s	ns
ILMN_1657864	79089	TMUB2	s	ns	ns	ns	ns	ns	ns	ns	ns	ns	ns	ns	ns	ns	s	ns
ILMN_1657993	23394	ADNP	s	ns	ns	ns	ns	ns	ns	ns	ns	ns	ns	ns	ns	ns	s	ns
ILMN_1658028	732371	LOC732371	s	ns	ns	ns	ns	ns	ns	ns	ns	ns	ns	ns	ns	ns	s	ns
ILMN_1658494	28984	C13orf15	s	ns	ns	ns	ns	ns	ns	ns	ns	ns	ns	ns	ns	ns	s	ns
ILMN_1658624	80700	UBXD1	s	ns	ns	ns	ns	ns	ns	ns	ns	ns	ns	ns	ns	ns	s	ns
ILMN_1658706	10610	ST6GALNAC2	ns	ns	ns	ns	ns	ns	ns	ns	ns	ns	ns	ns	ns	ns	s	ns
ILMN_1658740	285189	PLGLA1	s	ns	ns	ns	ns	ns	ns	ns	ns	ns	ns	ns	ns	ns	s	ns
ILMN_1658800	27154	BRPF3	ns	ns	ns	ns	ns	ns	ns	ns	ns	ns	ns	ns	ns	ns	s	ns
ILMN_1659047	8337	HIST2H2AA3	s	ns	ns	ns	ns	ns	ns	ns	ns	ns	ns	ns	ns	ns	s	ns
ILMN_1659411	5432	POLR2C	ns	s	ns	ns	ns	ns	ns	ns	ns	ns	ns	ns	ns	ns	s	ns
ILMN_1659463	317	APAF1	ns	s	ns	ns	ns	ns	ns	ns	ns	ns	ns	ns	ns	ns	s	ns
ILMN_1659523	10713	USP39	ns	s	ns	ns	ns	ns	ns	ns	ns	ns	ns	ns	ns	ns	s	ns
ILMN_1659564	29927	SEC61A1	ns	s	ns	ns	ns	ns	ns	ns	ns	ns	ns	ns	ns	ns	s	ns
ILMN_1659620	26292	MYCBP	s	ns	ns	ns	ns	ns	ns	ns	ns	ns	ns	ns	ns	ns	s	ns
ILMN_1659752	730996	LOC730996	ns	s	ns	ns	ns	ns	ns	ns	ns	ns	ns	ns	ns	ns	s	ns
ILMN_1659777	80230	RUFY1	ns	s	ns	ns	ns	ns	ns	ns	ns	ns	ns	ns	ns	ns	s	ns
ILMN_1659843	5611	DNAJC3	ns	s	ns	ns	ns	ns	ns	ns	ns	ns	ns	ns	ns	ns	s	ns
ILMN_1659874	57466	SFRS15	s	ns	ns	ns	ns	ns	ns	ns	ns	ns	ns	ns	ns	ns	s	ns
ILMN_1659936	23645	PPP1R15A	s	ns	ns	ns	ns	ns	ns	ns	ns	ns	ns	ns	ns	ns	s	ns
ILMN_1660232	5830	PEX5	ns	s	ns	ns	ns	ns	ns	ns	ns	ns	ns	ns	ns	ns	s	ns
ILMN_1660345	51335	NGRN	ns	ns	ns	ns	ns	ns	ns	ns	ns	ns	ns	ns	ns	ns	s	ns
ILMN_1660498	6232	RPS27	s	ns	ns	ns	ns	ns	ns	ns	ns	ns	ns	ns	ns	ns	s	ns
ILMN_1660549	79971	GPR177	s	ns	ns	ns	ns	ns	ns	ns	ns	ns	ns	ns	ns	ns	s	ns
ILMN_1660585	123207	C15orf40	s	ns	ns	ns	ns	ns	ns	ns	ns	ns	ns	ns	ns	ns	s	ns
ILMN_1660635	51110	LACTB2	s	ns	ns	ns	ns	ns	ns	ns	ns	ns	ns	ns	ns	ns	s	ns
ILMN_1660661	6950	TCP1	ns	ns	ns	ns	ns	ns	ns	ns	ns	ns	ns	ns	ns	ns	s	ns
ILMN_1660691	11031	RAB31	s	ns	ns	ns	ns	ns	ns	ns	ns	ns	ns	ns	ns	ns	s	ns
ILMN_1660723	112724	RDH13	ns	s	ns	ns	ns	ns	ns	ns	ns	ns	ns	ns	ns	ns	s	ns
ILMN_1660727	59084	ENPP5	ns	s	ns	ns	ns	ns	ns	ns	ns	ns	ns	ns	ns	ns	s	ns
ILMN_1660810	55761	TTC17	s	ns	ns	ns	ns	ns	ns	ns	ns	ns	ns	ns	ns	ns	s	ns
ILMN_1660856	440138	ALG11	ns	s	ns	ns	ns	ns	ns	ns	ns	ns	ns	ns	ns	ns	s	ns
ILMN_1660900	NA	SNORA7B	ns	s	ns	ns	ns	ns	ns	ns	ns	ns	ns	ns	ns	ns	s	ns
ILMN_1661039	51263	MRPL30	s	ns	ns	ns	ns	ns	ns	ns	ns	ns	ns	ns	ns	ns	s	ns
ILMN_1661158	284701	LOC284701	s	ns	ns	ns	ns	ns	ns	ns	ns	ns	ns	ns	ns	ns	s	ns
ILMN_1661174	731640	LOC731640	s	ns	ns	ns	ns	ns	ns	ns	ns	ns	ns	ns	ns	ns	s	ns
ILMN_1661359	158830	LOC158830	s	ns	ns	ns	ns	ns	ns	ns	ns	ns	ns	ns	ns	ns	s	ns
ILMN_1661439	10211	FLOT1	ns	s	ns	ns	ns	ns	ns	ns	ns	ns	ns	ns	ns	ns	s	ns
ILMN_1661484	84878	ZBTB45	ns	ns	ns	ns	ns	ns	ns	ns	ns	ns	ns	ns	ns	ns	s	ns
ILMN_1661554	1729	DIAPH1	s	ns	ns	ns	ns	ns	ns	ns	ns	ns	ns	ns	ns	ns	s	ns
ILMN_1661589	977	CD151	s	ns	ns	ns	ns	ns	ns	ns	ns	ns	ns	ns	ns	ns	s	ns
ILMN_1661647	646144	LOC646144	s	ns	ns	ns	ns	ns	ns	ns	ns	ns	ns	ns	ns	ns	s	ns
ILMN_1661650	57223	SMEK2	ns	s	ns	ns	ns	ns	ns	ns	ns	ns	ns	ns	ns	ns	s	ns
ILMN_1661809	79056	PRRG4	ns	ns	ns	ns	ns	ns	ns	ns	ns	ns	ns	ns	ns	ns	s	ns
ILMN_1661833	23253	ANKRD12	s	ns	ns	ns	ns	ns	ns	ns	ns	ns	ns	ns	ns	ns	s	ns
ILMN_1661940	23261	CAMTA1	ns	s	ns	ns	ns	ns	ns	ns	ns	ns	ns	ns	ns	ns	s	ns
ILMN_1662065	116143	WDR92	ns	ns	ns	ns	ns	ns	ns	ns	ns	ns	ns	ns	ns	ns	s	ns
ILMN_1662192	57209	ZNF248	s	ns	ns	ns	ns	ns	ns	ns	ns	ns	ns	ns	ns	ns	s	ns
ILMN_1662358	4599	MX1	ns	s	ns	ns	ns	ns	ns	ns	ns	ns	ns	ns	ns	ns	s	ns
ILMN_1662378	64096	GFRA4	ns	s	ns	ns	ns	ns	ns	ns	ns	ns	ns	ns	ns	ns	s	ns
ILMN_1662617	55012	PPP2R3C	ns	ns	ns	ns	ns	ns	ns	ns	ns	ns	ns	ns	ns	ns	s	ns
ILMN_1662741	9170	EDG4	s	ns	ns	ns	ns	ns	ns	ns	ns	ns	ns	ns	ns	ns	s	ns
ILMN_1662880	202299	FIS	ns	s	ns	ns	ns	ns	ns	ns	ns	ns	ns	ns	ns	ns	s	ns
ILMN_1662952	57592	ZNF687	s	ns	ns	ns	ns	ns	ns	ns	ns	ns	ns	ns	ns	ns	s	ns
ILMN_1663033	92305	TMEM129	s	ns	ns	ns	ns	ns	ns	ns	ns	ns	ns	ns	ns	ns	s	ns
ILMN_1663511	644625	LOC644625	s	ns	ns	ns	ns	ns	ns	ns	ns	ns	ns	ns	ns	ns	s	ns
ILMN_1663538	171425	CLYBL	ns	s	ns	ns	ns	ns	ns	ns	ns	ns	ns	ns	ns	ns	s	ns
ILMN_1663616	7266	DNAJC7	ns	ns	ns	ns	ns	ns	ns	ns	ns	ns	ns	ns	ns	ns	s	ns
ILMN_1663751	NA	CYCSL1	s	ns	ns	ns	ns	ns	ns	ns	ns	ns	ns	ns	ns	ns	s	ns
ILMN_1663866	7045	TGFBI	s	ns	ns	ns	ns	ns	ns	ns	ns	ns	ns	ns	ns	ns	s	ns
ILMN_1664068	57222	ERGIC1	ns	s	ns	ns	ns	ns	ns	ns	ns	ns	ns	ns	ns	ns	s	ns
ILMN_1664118	643665	LOC643665	s	ns	ns	ns	ns	ns	ns	ns	ns	ns	ns	ns	ns	ns	s	ns
ILMN_1664168	8402	SLC25A11	ns	s	ns	ns	ns	ns	ns	ns	ns	ns	ns	ns	ns	ns	s	ns
ILMN_1664186	55669	MFN1	ns	s	ns	ns	ns	ns	ns	ns	ns	ns	ns	ns	ns	ns	s	ns
ILMN_1664236	10863	ADAM28	s	ns	ns	ns	ns	ns	ns	ns	ns	ns	ns	ns	ns	ns	s	ns
ILMN_1664303	10553	HTATIP2	s	ns	ns	ns	ns	ns	ns	ns	ns	ns	ns	ns	ns	ns	s	ns
ILMN_1664369	55526	DHTKD1	ns	s	ns	ns	ns	ns	ns	ns	ns	ns	ns	ns	ns	ns	s	ns
ILMN_1664525	53829	P2RY13	ns	s	ns	ns	ns	ns	ns	ns	ns	ns	ns	ns	ns	ns	s	ns
ILMN_1664543	3437	IFIT3	ns	s	ns	ns	ns	ns	ns	ns	ns	ns	ns	ns	ns	ns	s	ns
ILMN_1664718	1595	CYP51A1	s	ns	ns	ns	ns	ns	ns	ns	ns	ns	ns	ns	ns	ns	s	ns
ILMN_1664756	3840	KPNA4	s	ns	ns	ns	ns	ns	ns	ns	ns	ns	ns	ns	ns	ns	s	ns
ILMN_1664761	51524	TMEM138	ns	s	ns	ns	ns	ns	ns	ns	ns	ns	ns	ns	ns	ns	s	ns
ILMN_1664776	23167	EFR3A	ns	s	ns	ns	ns	ns	ns	ns	ns	ns	ns	ns	ns	ns	s	ns
ILMN_1664955	642109	LOC642109	s	ns	ns	ns	ns	ns	ns	ns	ns	ns	ns	ns	ns	ns	s	ns
ILMN_1665058	84260	TCHP	s	ns	ns	ns	ns	ns	ns	ns	ns	ns	ns	ns	ns	ns	s	ns
ILMN_1665066	84273	C4orf14	ns	s	ns	ns	ns	ns	ns	ns	ns	ns	ns	ns	ns	ns	s	ns
ILMN_1665100	5742	PTGS1	s	ns	ns	ns	ns	ns	ns	ns	ns	ns	ns	ns	ns	ns	s	ns
ILMN_1665117	221477	C6orf89	ns	s	ns	ns	ns	ns	ns	ns	ns	ns	ns	ns	ns	ns	s	ns
ILMN_1665164	9646	CTR9	s	ns	ns	ns	ns	ns	ns	ns	ns	ns	ns	ns	ns	ns	s	ns
ILMN_1665327	168374	ZNF92	s	ns	ns	ns	ns	ns	ns	ns	ns	ns	ns	ns	ns	ns	s	ns
ILMN_1665428	79792	GSDMDC1	s	ns	ns	ns	ns	ns	ns	ns	ns	ns	ns	ns	ns	ns	s	ns
ILMN_1665737	7353	UFD1L	s	ns	ns	ns	ns	ns	ns	ns	ns	ns	ns	ns	ns	ns	s	ns
ILMN_1665964	9846	GAB2	ns	s	ns	ns	ns	ns	ns	ns	ns	ns	ns	ns	ns	ns	s	ns
ILMN_1666384	151579	LOC151579	s	ns	ns	ns	ns	ns	ns	ns	ns	ns	ns	ns	ns	ns	s	ns
ILMN_1666444	5937	RBMS1	s	ns	ns	ns	ns	ns	ns	ns	ns	ns	ns	ns	ns	ns	s	ns
ILMN_1666553	60386	SLC25A19	ns	s	ns	ns	ns	ns	ns	ns	ns	ns	ns	ns	ns	ns	s	ns
ILMN_1666609	23326	USP22	ns	s	ns	ns	ns	ns	ns	ns	ns	ns	ns	ns	ns	ns	s	ns
ILMN_1666635	6208	RPS14	s	ns	ns	ns	ns	ns	ns	ns	ns	ns	ns	ns	ns	ns	s	ns
ILMN_1666757	NA	SDHALP1	s	ns	ns	ns	ns	ns	ns	ns	ns	ns	ns	ns	ns	ns	s	ns
ILMN_1666853	644482	LOC644482	ns	ns	ns	ns	ns	ns	ns	ns	ns	ns	ns	ns	ns	ns	s	ns
ILMN_1666875	645914	LOC645914	s	ns	ns	ns	ns	ns	ns	ns	ns	ns	ns	ns	ns	ns	s	ns
ILMN_1666924	65018	PINK1	s	ns	ns	ns	ns	ns	ns	ns	ns	ns	ns	ns	ns	ns	s	ns
ILMN_1667043	9775	EIF4A3	ns	ns	ns	ns	ns	ns	ns	ns	ns	ns	ns	ns	ns	ns	s	ns
ILMN_1667110	642960	LOC642960	s	ns	ns	ns	ns	ns	ns	ns	ns	ns	ns	ns	ns	ns	s	ns
ILMN_1667260	5595	MAPK3	ns	s	ns	ns	ns	ns	ns	ns	ns	ns	ns	ns	ns	ns	s	ns
ILMN_1667319	64748	LPPR2	ns	ns	ns	ns	ns	ns	ns	ns	ns	ns	ns	ns	ns	ns	s	ns
ILMN_1667361	51226	COPZ2	s	ns	ns	ns	ns	ns	ns	ns	ns	ns	ns	ns	ns	ns	s	ns
ILMN_1667371	6503	SLA	ns	ns	ns	ns	ns	ns	ns	ns	ns	ns	ns	ns	ns	ns	s	ns
ILMN_1667408	2035	EPB41	ns	s	ns	ns	ns	ns	ns	ns	ns	ns	ns	ns	ns	ns	s	ns
ILMN_1667561	3475	IFRD1	ns	s	ns	ns	ns	ns	ns	ns	ns	ns	ns	ns	ns	ns	s	ns
ILMN_1667578	78986	DUSP26	s	ns	ns	ns	ns	ns	ns	ns	ns	ns	ns	ns	ns	ns	s	ns
ILMN_1667711	11145	HRASLS3	s	ns	ns	ns	ns	ns	ns	ns	ns	ns	ns	ns	ns	ns	s	ns
ILMN_1667796	3040	HBA2	ns	ns	ns	ns	ns	ns	ns	ns	ns	ns	ns	ns	ns	ns	s	ns
ILMN_1667813	648000	LOC648000	ns	s	ns	ns	ns	ns	ns	ns	ns	ns	ns	ns	ns	ns	s	ns
ILMN_1667858	284443	ZNF493	ns	ns	ns	ns	ns	ns	ns	ns	ns	ns	ns	ns	ns	ns	s	ns
ILMN_1668408	9131	AIFM1	ns	ns	ns	ns	ns	ns	ns	ns	ns	ns	ns	ns	ns	ns	s	ns
ILMN_1668535	9929	JOSD1	ns	ns	ns	ns	ns	ns	ns	ns	ns	ns	ns	ns	ns	ns	s	ns
ILMN_1668582	51185	CRBN	ns	s	ns	ns	ns	ns	ns	ns	ns	ns	ns	ns	ns	ns	s	ns
ILMN_1668586	3750	KCND1	ns	ns	ns	ns	ns	ns	ns	ns	ns	ns	ns	ns	ns	ns	s	ns
ILMN_1668629	401115	LOC401115	s	ns	ns	ns	ns	ns	ns	ns	ns	ns	ns	ns	ns	ns	s	ns
ILMN_1668639	26000	TBC1D10B	ns	s	ns	ns	ns	ns	ns	ns	ns	ns	ns	ns	ns	ns	s	ns
ILMN_1668960	58526	MID1IP1	ns	s	ns	ns	ns	ns	ns	ns	ns	ns	ns	ns	ns	ns	s	ns
ILMN_1668996	708	C1QBP	ns	s	ns	ns	ns	ns	ns	ns	ns	ns	ns	ns	ns	ns	s	ns
ILMN_1669015	7511	XPNPEP1	ns	s	ns	ns	ns	ns	ns	ns	ns	ns	ns	ns	ns	ns	s	ns
ILMN_1669122	221756	MGC39372	ns	ns	ns	ns	ns	ns	ns	ns	ns	ns	ns	ns	ns	ns	s	ns
ILMN_1669172	5801	PTPRR	ns	ns	ns	ns	ns	ns	ns	ns	ns	ns	ns	ns	ns	ns	s	ns
ILMN_1669317	27202	GPR77	s	ns	ns	ns	ns	ns	ns	ns	ns	ns	ns	ns	ns	ns	s	ns
ILMN_1669424	646531	LOC646531	s	ns	ns	ns	ns	ns	ns	ns	ns	ns	ns	ns	ns	ns	s	ns
ILMN_1669508	54623	PAF1	ns	ns	ns	ns	ns	ns	ns	ns	ns	ns	ns	ns	ns	ns	s	ns
ILMN_1669584	3609	ILF3	s	ns	ns	ns	ns	ns	ns	ns	ns	ns	ns	ns	ns	ns	s	ns
ILMN_1669657	440345	LOC440345	ns	s	ns	ns	ns	ns	ns	ns	ns	ns	ns	ns	ns	ns	s	ns
ILMN_1669674	10695	CNPY3	ns	ns	ns	ns	ns	ns	ns	ns	ns	ns	ns	ns	ns	ns	s	ns
ILMN_1669832	6938	TCF12	s	ns	ns	ns	ns	ns	ns	ns	ns	ns	ns	ns	ns	ns	s	ns
ILMN_1669833	10603	SH2B2	ns	s	ns	ns	ns	ns	ns	ns	ns	ns	ns	ns	ns	ns	s	ns
ILMN_1669851	64940	STAG3L4	ns	s	ns	ns	ns	ns	ns	ns	ns	ns	ns	ns	ns	ns	s	ns
ILMN_1670188	407977	TNFSF12-TNFSF13	ns	ns	ns	ns	ns	ns	ns	ns	ns	ns	ns	ns	ns	ns	s	ns
ILMN_1670238	8318	CDC45L	ns	ns	ns	ns	ns	ns	ns	ns	ns	ns	ns	ns	ns	ns	s	ns
ILMN_1670256	5163	PDK1	s	ns	ns	ns	ns	ns	ns	ns	ns	ns	ns	ns	ns	ns	s	ns
ILMN_1670472	23197	UBXD8	ns	ns	ns	ns	ns	ns	ns	ns	ns	ns	ns	ns	ns	ns	s	ns
ILMN_1670723	10943	MSL3L1	ns	ns	ns	ns	ns	ns	ns	ns	ns	ns	ns	ns	ns	ns	s	ns
ILMN_1671142	8111	GPR68	s	ns	ns	ns	ns	ns	ns	ns	ns	ns	ns	ns	ns	ns	s	ns
ILMN_1671260	79971	GPR177	s	ns	ns	ns	ns	ns	ns	ns	ns	ns	ns	ns	ns	ns	s	ns
ILMN_1671482	130589	GALM	ns	s	ns	ns	ns	ns	ns	ns	ns	ns	ns	ns	ns	ns	s	ns
ILMN_1671568	55268	ECHDC2	ns	ns	ns	ns	ns	ns	ns	ns	ns	ns	ns	ns	ns	ns	s	ns
ILMN_1672606	4938	OAS1	ns	s	ns	ns	ns	ns	ns	ns	ns	ns	ns	ns	ns	ns	s	ns
ILMN_1672811	54991	C1orf159	ns	ns	ns	ns	ns	ns	ns	ns	ns	ns	ns	ns	ns	ns	s	ns
ILMN_1672878	29	ABR	ns	ns	ns	ns	ns	ns	ns	ns	ns	ns	ns	ns	ns	ns	s	ns
ILMN_1672940	54811	ZNF562	s	ns	ns	ns	ns	ns	ns	ns	ns	ns	ns	ns	ns	ns	s	ns
ILMN_1673030	1240	CMKLR1	ns	ns	ns	ns	ns	ns	ns	ns	ns	ns	ns	ns	ns	ns	s	ns
ILMN_1673299	7634	ZNF80	s	ns	ns	ns	ns	ns	ns	ns	ns	ns	ns	ns	ns	ns	s	ns
ILMN_1673586	6533	SLC6A6	s	ns	ns	ns	ns	ns	ns	ns	ns	ns	ns	ns	ns	ns	s	ns
ILMN_1673757	841	CASP8	s	ns	ns	ns	ns	ns	ns	ns	ns	ns	ns	ns	ns	ns	s	ns
ILMN_1673917	2969	GTF2I	ns	ns	ns	ns	ns	ns	ns	ns	ns	ns	ns	ns	ns	ns	s	ns
ILMN_1674152	4793	NFKBIB	ns	ns	ns	ns	ns	ns	ns	ns	ns	ns	ns	ns	ns	ns	s	ns
ILMN_1674265	10677	AVIL	ns	ns	ns	ns	ns	ns	ns	ns	ns	ns	ns	ns	ns	ns	s	ns
ILMN_1675083	2157	F8	ns	ns	ns	ns	ns	ns	ns	ns	ns	ns	ns	ns	ns	ns	s	ns
ILMN_1675190	56729	RETN	ns	ns	ns	ns	ns	ns	ns	ns	ns	ns	ns	ns	ns	ns	s	ns
ILMN_1675266	51172	NAGPA	ns	s	ns	ns	ns	ns	ns	ns	ns	ns	ns	ns	ns	ns	s	ns
ILMN_1675483	51281	ANKMY1	ns	ns	ns	ns	ns	ns	ns	ns	ns	ns	ns	ns	ns	ns	s	ns
ILMN_1675577	115708	C14orf172	ns	ns	ns	ns	ns	ns	ns	ns	ns	ns	ns	ns	ns	ns	s	ns
ILMN_1675674	10277	UBE4B	ns	ns	ns	ns	ns	ns	ns	ns	ns	ns	ns	ns	ns	ns	s	ns
ILMN_1675788	7728	ZNF175	ns	ns	ns	ns	ns	ns	ns	ns	ns	ns	ns	ns	ns	ns	s	ns
ILMN_1652309	123016	TTC8	s	ns	ns	ns	ns	ns	ns	s	ns	ns	ns	ns	ns	s	ns	ns
ILMN_1652907	988	CDC5L	s	ns	ns	ns	ns	ns	ns	ns	ns	ns	ns	ns	ns	s	ns	ns
ILMN_1653120	6480	ST6GAL1	s	ns	ns	ns	ns	ns	ns	s	ns	ns	ns	ns	ns	s	ns	ns
ILMN_1653143	11319	ECD	s	ns	ns	ns	ns	ns	ns	ns	ns	ns	ns	ns	ns	s	ns	ns
ILMN_1653797	81688	C6orf62	ns	s	ns	ns	ns	ns	ns	ns	ns	ns	ns	ns	ns	s	ns	ns
ILMN_1654001	79677	SMC6	s	ns	ns	ns	ns	ns	ns	ns	ns	ns	ns	ns	ns	s	ns	ns
ILMN_1651652	10313	RTN3	ns	s	ns	ns	ns	ns	ns	ns	ns	ns	ns	ns	s	ns	ns	ns
ILMN_1651735	10618	TGOLN2	ns	s	ns	ns	ns	ns	s	ns	ns	ns	ns	ns	s	ns	ns	ns
ILMN_1652185	3566	IL4R	ns	s	ns	ns	ns	ns	ns	s	ns	ns	ns	ns	s	ns	ns	ns
ILMN_1652631	152007	C9orf19	ns	s	ns	ns	ns	ns	ns	ns	ns	s	ns	s	s	ns	ns	ns
ILMN_1652749	2077	ERF	s	ns	ns	ns	ns	ns	ns	s	s	ns	ns	ns	s	ns	ns	ns
ILMN_1653205	401466	C8orf59	ns	s	ns	ns	ns	ns	ns	s	ns	ns	ns	ns	s	ns	ns	ns
ILMN_1653220	9600	PITPNM1	ns	s	ns	ns	ns	ns	ns	ns	ns	ns	ns	ns	s	ns	ns	ns
ILMN_1653404	28511	NKIRAS2	s	ns	ns	ns	ns	ns	ns	ns	ns	ns	ns	ns	s	ns	ns	ns
ILMN_1653429	23443	SLC35A3	ns	s	ns	ns	ns	ns	ns	ns	ns	ns	ns	ns	s	ns	ns	ns
ILMN_1653469	6136	RPL12	ns	s	ns	ns	ns	ns	ns	ns	ns	ns	ns	ns	s	ns	ns	ns
ILMN_1653496	2752	GLUL	s	ns	ns	ns	ns	ns	ns	ns	ns	s	ns	ns	s	ns	ns	ns
ILMN_1653646	84993	UBL7	ns	s	ns	ns	ns	ns	ns	ns	ns	ns	ns	ns	s	ns	ns	ns
ILMN_1654112	50855	PARD6A	s	ns	ns	ns	ns	ns	ns	ns	ns	ns	ns	ns	s	ns	ns	ns
ILMN_1652486	80764	THAP7	ns	s	ns	ns	ns	ns	s	ns	ns	ns	ns	s	ns	ns	ns	ns
ILMN_1652735	5994	RFXAP	ns	s	ns	ns	ns	ns	s	ns	ns	ns	ns	s	ns	ns	ns	ns
ILMN_1652000	29057	FAM156A	s	ns	ns	ns	ns	ns	ns	s	ns	ns	s	ns	ns	ns	ns	ns
ILMN_1652160	987	LRBA	ns	s	ns	ns	ns	ns	ns	s	ns	ns	s	ns	ns	ns	ns	ns
ILMN_1652164	729196	LOC729196	ns	s	ns	ns	ns	ns	ns	ns	ns	ns	s	ns	ns	ns	ns	ns
ILMN_1652409	55812	SPATA7	s	ns	ns	ns	ns	ns	ns	s	ns	ns	s	ns	ns	ns	ns	ns
ILMN_1652490	54682	MANSC1	ns	s	ns	ns	ns	ns	s	ns	s	ns	s	ns	ns	ns	ns	ns
ILMN_1653129	1478	CSTF2	ns	s	ns	ns	ns	ns	ns	ns	ns	ns	s	ns	ns	ns	ns	ns
ILMN_1653711	2535	FZD2	ns	s	ns	ns	ns	ns	ns	ns	ns	s	ns	ns	ns	ns	ns	ns
ILMN_1652379	8801	SUCLG2	ns	s	ns	ns	ns	ns	ns	ns	s	ns	ns	ns	ns	ns	ns	ns
ILMN_1652906	26301	GBGT1	ns	s	ns	ns	ns	ns	s	ns	s	ns	ns	ns	ns	ns	ns	ns
ILMN_1653115	1891	ECH1	s	ns	ns	ns	ns	ns	ns	s	s	ns	ns	ns	ns	ns	ns	ns
ILMN_1653292	5210	PFKFB4	s	ns	ns	ns	ns	ns	ns	ns	s	ns	ns	ns	ns	ns	ns	ns
ILMN_1653443	1017	CDK2	ns	s	ns	ns	ns	ns	ns	ns	s	ns	ns	ns	ns	ns	ns	ns
ILMN_1653612	54793	KCTD9	ns	s	ns	ns	ns	ns	ns	ns	s	ns	ns	ns	ns	ns	ns	ns
ILMN_1653709	26520	TIMM9	ns	s	ns	ns	ns	ns	ns	ns	s	ns	ns	ns	ns	ns	ns	ns
ILMN_1653718	130617	ZFAND2B	ns	s	ns	ns	ns	ns	ns	ns	s	ns	ns	ns	ns	ns	ns	ns
ILMN_1654010	56894	AGPAT3	s	ns	ns	ns	ns	ns	ns	ns	s	ns	ns	ns	ns	ns	ns	ns
ILMN_1654212	285489	DOK7	ns	s	ns	ns	ns	ns	ns	ns	s	ns	ns	ns	ns	ns	ns	ns
ILMN_1654398	23179	RGL1	ns	s	ns	ns	ns	ns	ns	ns	s	ns	ns	ns	ns	ns	ns	ns
ILMN_1654445	347292	LOC347292	ns	s	ns	ns	ns	ns	ns	ns	s	ns	ns	ns	ns	ns	ns	ns
ILMN_1651964	10057	ABCC5	ns	s	ns	ns	ns	ns	ns	s	ns	ns	ns	ns	ns	ns	ns	ns
ILMN_1652647	3631	INPP4A	s	ns	ns	ns	ns	ns	ns	ns	ns	ns	ns	ns	ns	ns	ns	ns
ILMN_1652762	23119	HIC2	ns	s	ns	ns	ns	ns	ns	s	ns	ns	ns	ns	ns	ns	ns	ns
ILMN_1653355	23784	A26C3	ns	s	ns	ns	ns	ns	ns	ns	ns	ns	ns	ns	ns	ns	ns	ns
ILMN_1653856	84959	STS-1	ns	s	ns	ns	ns	ns	ns	ns	ns	ns	ns	ns	ns	ns	ns	ns
ILMN_1654322	483	ATP1B3	ns	s	ns	ns	ns	ns	ns	ns	ns	ns	ns	ns	ns	ns	ns	ns
ILMN_1651228	6234	RPS28	ns	s	ns	ns	ns	ns	s	ns	ns	ns	ns	ns	ns	ns	ns	ns
ILMN_1651254	4026	LPP	s	ns	ns	ns	ns	ns	ns	s	ns	ns	ns	ns	ns	ns	ns	ns
ILMN_1651336	23417	MLYCD	ns	s	ns	ns	ns	ns	s	ns	ns	ns	ns	ns	ns	ns	ns	ns
ILMN_1651347	9792	SERTAD2	s	ns	ns	ns	ns	ns	ns	ns	ns	ns	ns	ns	ns	ns	ns	ns
ILMN_1651364	84105	PCBD2	s	ns	ns	ns	ns	ns	ns	ns	ns	ns	ns	ns	ns	ns	ns	ns
ILMN_1651378	550	AUP1	s	ns	ns	ns	ns	ns	ns	ns	ns	ns	ns	ns	ns	ns	ns	ns
ILMN_1651403	642161	LOC642161	ns	ns	ns	ns	ns	ns	ns	s	ns	ns	ns	ns	ns	ns	ns	ns
ILMN_1651496	3017	HIST1H2BD	s	ns	ns	ns	ns	ns	ns	s	ns	ns	ns	ns	ns	ns	ns	ns
ILMN_1651501	5826	ABCD4	ns	s	ns	ns	ns	ns	ns	s	ns	ns	ns	ns	ns	ns	ns	ns
ILMN_1651504	8603	C4orf8	ns	s	ns	ns	ns	ns	ns	s	ns	ns	ns	ns	ns	ns	ns	ns
ILMN_1651936	387893	SETD8	s	ns	ns	ns	ns	ns	ns	s	ns	ns	ns	ns	ns	ns	ns	ns
ILMN_1652073	653658	LOC653658	s	ns	ns	ns	ns	ns	ns	s	ns	ns	ns	ns	ns	ns	ns	ns
ILMN_1652459	654161	LOC654161	s	ns	ns	ns	ns	ns	ns	ns	ns	ns	ns	ns	ns	ns	ns	ns
ILMN_1652913	2146	EZH2	s	ns	ns	ns	ns	ns	ns	ns	ns	ns	ns	ns	ns	ns	ns	ns
ILMN_1653166	10462	CLEC10A	s	ns	ns	ns	ns	ns	ns	ns	ns	ns	ns	ns	ns	ns	ns	ns
ILMN_1653319	4157	MC1R	ns	s	ns	ns	ns	ns	ns	ns	ns	ns	ns	ns	ns	ns	ns	ns
ILMN_1653367	6883	TAF12	s	ns	ns	ns	ns	ns	ns	ns	ns	ns	ns	ns	ns	ns	ns	ns
ILMN_1653386	391365	SULT6B1	s	ns	ns	ns	ns	ns	ns	ns	ns	ns	ns	ns	ns	ns	ns	ns
ILMN_1653412	84839	RAXL1	ns	s	ns	ns	ns	ns	ns	ns	ns	ns	ns	ns	ns	ns	ns	ns
ILMN_1654262	64393	ZMAT3	ns	s	ns	ns	ns	ns	ns	ns	ns	ns	ns	ns	ns	ns	ns	ns
ILMN_1654392	23351	KIAA0323	s	ns	ns	ns	ns	ns	ns	ns	ns	ns	ns	ns	ns	ns	ns	ns
ILMN_1651498	10912	GADD45G	ns	s	ns	ns	ns	ns	ns	s	ns	ns	ns	ns	ns	ns	ns	ns
ILMN_1651899	653314	LOC653314	s	ns	ns	ns	ns	ns	ns	ns	ns	ns	ns	ns	ns	ns	ns	ns
ILMN_1651958	4256	MGP	ns	s	ns	ns	ns	ns	ns	s	ns	ns	ns	ns	ns	ns	ns	ns
ILMN_1652008	90417	C15orf23	ns	s	ns	ns	ns	ns	ns	ns	ns	ns	ns	ns	ns	ns	ns	ns
ILMN_1652082	2000	ELF4	s	ns	ns	ns	ns	ns	ns	ns	ns	ns	ns	ns	ns	ns	ns	ns
ILMN_1652650	30011	SH3KBP1	ns	s	ns	ns	ns	ns	ns	s	ns	ns	ns	ns	ns	ns	ns	ns
ILMN_1653200	51310	SLC22A17	ns	s	ns	ns	ns	ns	ns	s	ns	ns	ns	ns	ns	ns	ns	ns
ILMN_1654210	911	CD1C	s	ns	ns	ns	ns	ns	ns	ns	ns	ns	ns	ns	ns	ns	ns	ns
ILMN_1654268	3148	HMGB2	ns	s	ns	ns	ns	ns	ns	ns	ns	ns	ns	ns	ns	ns	ns	ns
ILMN_1654516	83862	TMEM120A	ns	s	ns	ns	ns	ns	ns	ns	ns	ns	ns	ns	ns	ns	ns	ns
ILMN_1654609	114915	TIGA1	ns	s	ns	ns	ns	ns	ns	ns	ns	ns	ns	ns	ns	ns	ns	ns
ILMN_1654812	81622	UNC93B1	s	ns	ns	ns	ns	ns	ns	ns	ns	ns	ns	ns	ns	ns	ns	ns
ILMN_1654875	1178	CLC	s	ns	ns	ns	ns	ns	ns	ns	ns	ns	ns	ns	ns	ns	ns	ns
ILMN_1655577	7074	TIAM1	ns	s	ns	ns	ns	ns	ns	ns	ns	ns	ns	ns	ns	ns	ns	ns
ILMN_1656293	9570	GOSR2	s	ns	ns	ns	ns	ns	ns	ns	ns	ns	ns	ns	ns	ns	ns	ns
ILMN_1656560	25849	DKFZP564O0823	ns	s	ns	ns	ns	ns	ns	ns	ns	ns	ns	ns	ns	ns	ns	ns
ILMN_1651328	NA	LAT1-3TM	s	ns	ns	ns	ns	ns	ns	s	ns	ns	ns	ns	ns	ns	ns	ns
ILMN_1651373	6007	RHD	s	ns	ns	ns	ns	ns	ns	s	ns	ns	ns	ns	ns	ns	ns	ns
ILMN_1651405	65980	BRD9	s	ns	ns	ns	ns	ns	ns	s	ns	ns	ns	ns	ns	ns	ns	ns
ILMN_1651492	7482	WNT2B	ns	s	ns	ns	ns	ns	ns	s	ns	ns	ns	ns	ns	ns	ns	ns
ILMN_1651499	57222	ERGIC1	ns	s	ns	ns	ns	ns	ns	s	ns	ns	ns	ns	ns	ns	ns	ns
ILMN_1651705	847	CAT	ns	s	ns	ns	ns	ns	s	ns	ns	ns	ns	ns	ns	ns	ns	ns
ILMN_1651950	8460	TPST1	s	ns	ns	ns	ns	ns	ns	s	ns	ns	ns	ns	ns	ns	ns	ns
ILMN_1652163	1856	DVL2	ns	s	ns	ns	ns	ns	ns	s	ns	ns	ns	ns	ns	ns	ns	ns
ILMN_1652242	643206	LOC643206	s	ns	ns	ns	ns	ns	ns	s	ns	ns	ns	ns	ns	ns	ns	ns
ILMN_1652609	64283	RGNEF	ns	s	ns	ns	ns	ns	s	ns	ns	ns	ns	ns	ns	ns	ns	ns
ILMN_1652955	648622	LOC648622	ns	s	ns	ns	ns	ns	ns	s	ns	ns	ns	ns	ns	ns	ns	ns
ILMN_1653180	7171	TPM4	s	ns	ns	ns	ns	ns	ns	ns	ns	ns	ns	ns	ns	ns	ns	ns
ILMN_1653438	9678	PHF14	s	ns	ns	ns	ns	ns	ns	ns	ns	ns	ns	ns	ns	ns	ns	ns
ILMN_1653466	57801	HES4	ns	s	ns	ns	ns	ns	ns	ns	ns	ns	ns	ns	ns	ns	ns	ns
ILMN_1653618	26009	ZZZ3	s	ns	ns	ns	ns	ns	ns	ns	ns	ns	ns	ns	ns	ns	ns	ns
ILMN_1654016	103910	MRLC2	ns	s	ns	ns	ns	ns	ns	ns	ns	ns	ns	ns	ns	ns	ns	ns
ILMN_1655307	84908	FAM136A	s	ns	ns	ns	ns	ns	ns	ns	ns	ns	ns	ns	ns	ns	ns	ns
ILMN_1655377	56945	MRPS22	ns	s	ns	ns	ns	ns	ns	ns	ns	ns	ns	ns	ns	ns	ns	ns
ILMN_1655561	10094	ARPC3	s	ns	ns	ns	ns	ns	ns	ns	ns	ns	ns	ns	ns	ns	ns	ns
ILMN_1655720	26504	CNNM4	s	ns	ns	ns	ns	ns	ns	ns	ns	ns	ns	ns	ns	ns	ns	ns
ILMN_1655844	9015	TAF1A	s	ns	ns	ns	ns	ns	ns	ns	ns	ns	ns	ns	ns	ns	ns	ns
ILMN_1655864	653853	LOC653853	s	ns	ns	ns	ns	ns	ns	ns	ns	ns	ns	ns	ns	ns	ns	ns
ILMN_1656159	57205	ATP10D	s	ns	ns	ns	ns	ns	ns	ns	ns	ns	ns	ns	ns	ns	ns	ns
ILMN_1656521	27341	CGI-96	ns	s	ns	ns	ns	ns	ns	ns	ns	ns	ns	ns	ns	ns	ns	ns
ILMN_1656530	642788	LOC642788	ns	s	ns	ns	ns	ns	ns	ns	ns	ns	ns	ns	ns	ns	ns	ns
ILMN_1656628	10785	WDR4	s	ns	ns	ns	ns	ns	ns	ns	ns	ns	ns	ns	ns	ns	ns	ns
ILMN_1656718	54849	DEF8	ns	s	ns	ns	ns	ns	ns	ns	ns	ns	ns	ns	ns	ns	ns	ns
ILMN_1656925	401180	LOC401180	ns	s	ns	ns	ns	ns	ns	ns	ns	ns	ns	ns	ns	ns	ns	ns
ILMN_1651557	143888	KDELC2	ns	s	ns	ns	ns	ns	ns	s	ns	ns	ns	ns	ns	ns	ns	ns
ILMN_1652199	642113	LOC642113	ns	ns	ns	ns	ns	ns	ns	s	ns	ns	ns	ns	ns	ns	ns	ns
ILMN_1652417	389760	DC36	s	ns	ns	ns	ns	ns	ns	s	ns	ns	ns	ns	ns	ns	ns	ns
ILMN_1652487	83732	RIOK1	ns	s	ns	ns	ns	ns	ns	s	ns	ns	ns	ns	ns	ns	ns	ns
ILMN_1652505	27301	APEX2	ns	s	ns	ns	ns	ns	ns	s	ns	ns	ns	ns	ns	ns	ns	ns
ILMN_1652512	25966	C2CD2	ns	s	ns	ns	ns	ns	ns	s	ns	ns	ns	ns	ns	ns	ns	ns
ILMN_1652580	5424	POLD1	s	ns	ns	ns	ns	ns	ns	s	ns	ns	ns	ns	ns	ns	ns	ns
ILMN_1652594	79913	ACTR5	ns	ns	ns	ns	ns	ns	ns	s	ns	ns	ns	ns	ns	ns	ns	ns
ILMN_1652753	80227	PAAF1	ns	s	ns	ns	ns	ns	ns	s	ns	ns	ns	ns	ns	ns	ns	ns
ILMN_1652754	126299	ZNF428	ns	s	ns	ns	ns	ns	ns	s	ns	ns	ns	ns	ns	ns	ns	ns
ILMN_1652777	10435	CDC42EP2	s	ns	ns	ns	ns	ns	ns	s	ns	ns	ns	ns	ns	ns	ns	ns
ILMN_1652790	1195	CLK1	s	ns	ns	ns	ns	ns	ns	s	ns	ns	ns	ns	ns	ns	ns	ns
ILMN_1652819	80207	OPA3	ns	ns	ns	ns	ns	ns	ns	s	ns	ns	ns	ns	ns	ns	ns	ns
ILMN_1652872	22888	UBOX5	s	ns	ns	ns	ns	ns	ns	s	ns	ns	ns	ns	ns	ns	ns	ns
ILMN_1653039	642934	LOC642934	ns	s	ns	ns	ns	ns	ns	s	ns	ns	ns	ns	ns	ns	ns	ns
ILMN_1653047	79665	DHX40	ns	s	ns	ns	ns	ns	ns	s	ns	ns	ns	ns	ns	ns	ns	ns
ILMN_1653203	30008	EFEMP2	s	ns	ns	ns	ns	ns	ns	s	ns	ns	ns	ns	ns	ns	ns	ns
ILMN_1651429	140606	SELM	s	ns	ns	ns	ns	ns	s	ns	ns	ns	ns	ns	ns	ns	ns	ns
ILMN_1651684	9786	KIAA0586	s	ns	ns	ns	ns	ns	s	ns	ns	ns	ns	ns	ns	ns	ns	ns
ILMN_1651872	29914	UBIAD1	ns	s	ns	ns	ns	ns	s	ns	ns	ns	ns	ns	ns	ns	ns	ns
ILMN_1651886	55280	CWF19L1	ns	s	ns	ns	ns	ns	s	ns	ns	ns	ns	ns	ns	ns	ns	ns
ILMN_1652207	1327	COX4I1	ns	s	ns	ns	ns	ns	s	ns	ns	ns	ns	ns	ns	ns	ns	ns
ILMN_1652277	6398	SECTM1	ns	s	ns	ns	ns	ns	s	ns	ns	ns	ns	ns	ns	ns	ns	ns
ILMN_1652472	673	BRAF	ns	s	ns	ns	ns	ns	s	ns	ns	ns	ns	ns	ns	ns	ns	ns
ILMN_1652521	66036	MTMR9	ns	s	ns	ns	ns	ns	s	ns	ns	ns	ns	ns	ns	ns	ns	ns
ILMN_1652989	23279	NUP160	ns	s	ns	ns	ns	ns	s	ns	ns	ns	ns	ns	ns	ns	ns	ns
ILMN_1653165	14	AAMP	s	ns	ns	ns	ns	ns	s	ns	ns	ns	ns	ns	ns	ns	ns	ns
ILMN_1651513	23517	SKIV2L2	ns	s	ns	ns	ns	ns	ns	ns	ns	ns	ns	ns	ns	ns	ns	ns
ILMN_1651799	54407	SLC38A2	ns	s	ns	ns	ns	ns	ns	ns	ns	ns	ns	ns	ns	ns	ns	ns
ILMN_1653026	51316	PLAC8	ns	s	ns	ns	ns	ns	ns	ns	ns	ns	ns	ns	ns	ns	ns	ns
ILMN_1653480	202243	KENAE	ns	s	ns	ns	ns	ns	ns	ns	ns	ns	ns	ns	ns	ns	ns	ns
ILMN_1653504	1901	EDG1	ns	s	ns	ns	ns	ns	ns	ns	ns	ns	ns	ns	ns	ns	ns	ns
ILMN_1653514	5928	RBBP4	ns	s	ns	ns	ns	ns	ns	ns	ns	ns	ns	ns	ns	ns	ns	ns
ILMN_1653553	283643	C14orf80	ns	s	ns	ns	ns	ns	ns	ns	ns	ns	ns	ns	ns	ns	ns	ns
ILMN_1653599	513	ATP5D	ns	s	ns	ns	ns	ns	ns	ns	ns	ns	ns	ns	ns	ns	ns	ns
ILMN_1653708	57175	CORO1B	ns	s	ns	ns	ns	ns	ns	ns	ns	ns	ns	ns	ns	ns	ns	ns
ILMN_1653730	64064	OXCT2	ns	s	ns	ns	ns	ns	ns	ns	ns	ns	ns	ns	ns	ns	ns	ns
ILMN_1653871	10135	NAMPT	ns	s	ns	ns	ns	ns	ns	ns	ns	ns	ns	ns	ns	ns	ns	ns
ILMN_1654287	115	ADCY9	ns	s	ns	ns	ns	ns	ns	ns	ns	ns	ns	ns	ns	ns	ns	ns
ILMN_1654320	644250	LOC644250	ns	s	ns	ns	ns	ns	ns	ns	ns	ns	ns	ns	ns	ns	ns	ns
ILMN_1654370	10420	TESK2	ns	s	ns	ns	ns	ns	ns	ns	ns	ns	ns	ns	ns	ns	ns	ns
ILMN_1654488	7403	UTX	ns	s	ns	ns	ns	ns	ns	ns	ns	ns	ns	ns	ns	ns	ns	ns
ILMN_1654497	84896	ATAD1	ns	s	ns	ns	ns	ns	ns	ns	ns	ns	ns	ns	ns	ns	ns	ns
ILMN_1654542	83989	C5orf21	ns	s	ns	ns	ns	ns	ns	ns	ns	ns	ns	ns	ns	ns	ns	ns
ILMN_1654560	10333	TLR6	ns	s	ns	ns	ns	ns	ns	ns	ns	ns	ns	ns	ns	ns	ns	ns
ILMN_1654629	84286	TMEM175	ns	s	ns	ns	ns	ns	ns	ns	ns	ns	ns	ns	ns	ns	ns	ns
ILMN_1654639	55008	HERC6	ns	s	ns	ns	ns	ns	ns	ns	ns	ns	ns	ns	ns	ns	ns	ns
ILMN_1654685	79772	MCTP1	ns	s	ns	ns	ns	ns	ns	ns	ns	ns	ns	ns	ns	ns	ns	ns
ILMN_1654690	27440	CECR5	ns	s	ns	ns	ns	ns	ns	ns	ns	ns	ns	ns	ns	ns	ns	ns
ILMN_1654735	28232	SLCO3A1	ns	s	ns	ns	ns	ns	ns	ns	ns	ns	ns	ns	ns	ns	ns	ns
ILMN_1654773	8573	CASK	ns	s	ns	ns	ns	ns	ns	ns	ns	ns	ns	ns	ns	ns	ns	ns
ILMN_1654823	284942	MGC70863	ns	s	ns	ns	ns	ns	ns	ns	ns	ns	ns	ns	ns	ns	ns	ns
ILMN_1654851	79137	FAM134A	ns	s	ns	ns	ns	ns	ns	ns	ns	ns	ns	ns	ns	ns	ns	ns
ILMN_1654861	50	ACO2	ns	s	ns	ns	ns	ns	ns	ns	ns	ns	ns	ns	ns	ns	ns	ns
ILMN_1654864	148362	C1orf58	ns	s	ns	ns	ns	ns	ns	ns	ns	ns	ns	ns	ns	ns	ns	ns
ILMN_1655068	146691	TOM1L2	ns	s	ns	ns	ns	ns	ns	ns	ns	ns	ns	ns	ns	ns	ns	ns
ILMN_1655077	639	PRDM1	ns	s	ns	ns	ns	ns	ns	ns	ns	ns	ns	ns	ns	ns	ns	ns
ILMN_1655126	375133	PI4KAP2	ns	s	ns	ns	ns	ns	ns	ns	ns	ns	ns	ns	ns	ns	ns	ns
ILMN_1655163	8428	STK24	ns	s	ns	ns	ns	ns	ns	ns	ns	ns	ns	ns	ns	ns	ns	ns
ILMN_1655165	51444	RNF138	ns	s	ns	ns	ns	ns	ns	ns	ns	ns	ns	ns	ns	ns	ns	ns
ILMN_1655191	54897	CASZ1	ns	s	ns	ns	ns	ns	ns	ns	ns	ns	ns	ns	ns	ns	ns	ns
ILMN_1655195	11039	SMA4	ns	s	ns	ns	ns	ns	ns	ns	ns	ns	ns	ns	ns	ns	ns	ns
ILMN_1655312	11234	HPS5	ns	s	ns	ns	ns	ns	ns	ns	ns	ns	ns	ns	ns	ns	ns	ns
ILMN_1655329	55781	RIOK2	ns	s	ns	ns	ns	ns	ns	ns	ns	ns	ns	ns	ns	ns	ns	ns
ILMN_1655429	7126	TNFAIP1	ns	s	ns	ns	ns	ns	ns	ns	ns	ns	ns	ns	ns	ns	ns	ns
ILMN_1655433	594	BCKDHB	ns	s	ns	ns	ns	ns	ns	ns	ns	ns	ns	ns	ns	ns	ns	ns
ILMN_1655469	10099	TSPAN3	ns	s	ns	ns	ns	ns	ns	ns	ns	ns	ns	ns	ns	ns	ns	ns
ILMN_1655557	26512	INTS6	ns	s	ns	ns	ns	ns	ns	ns	ns	ns	ns	ns	ns	ns	ns	ns
ILMN_1655611	128553	TSHZ2	ns	s	ns	ns	ns	ns	ns	ns	ns	ns	ns	ns	ns	ns	ns	ns
ILMN_1655614	1832	DSP	ns	s	ns	ns	ns	ns	ns	ns	ns	ns	ns	ns	ns	ns	ns	ns
ILMN_1655622	5612	PRKRIR	ns	s	ns	ns	ns	ns	ns	ns	ns	ns	ns	ns	ns	ns	ns	ns
ILMN_1655654	9526	MPDU1	ns	s	ns	ns	ns	ns	ns	ns	ns	ns	ns	ns	ns	ns	ns	ns
ILMN_1655734	80135	BXDC5	ns	s	ns	ns	ns	ns	ns	ns	ns	ns	ns	ns	ns	ns	ns	ns
ILMN_1655827	9318	COPS2	ns	s	ns	ns	ns	ns	ns	ns	ns	ns	ns	ns	ns	ns	ns	ns
ILMN_1655876	57146	TMEM159	ns	s	ns	ns	ns	ns	ns	ns	ns	ns	ns	ns	ns	ns	ns	ns
ILMN_1655930	22936	ELL2	ns	s	ns	ns	ns	ns	ns	ns	ns	ns	ns	ns	ns	ns	ns	ns
ILMN_1655941	84222	DKFZp434N035	ns	s	ns	ns	ns	ns	ns	ns	ns	ns	ns	ns	ns	ns	ns	ns
ILMN_1655952	375690	FAM39E	ns	s	ns	ns	ns	ns	ns	ns	ns	ns	ns	ns	ns	ns	ns	ns
ILMN_1655961	27099	C7orf54	ns	s	ns	ns	ns	ns	ns	ns	ns	ns	ns	ns	ns	ns	ns	ns
ILMN_1656019	642003	LOC642003	ns	s	ns	ns	ns	ns	ns	ns	ns	ns	ns	ns	ns	ns	ns	ns
ILMN_1656129	57181	SLC39A10	ns	s	ns	ns	ns	ns	ns	ns	ns	ns	ns	ns	ns	ns	ns	ns
ILMN_1656184	NA	PI4KAP1	ns	s	ns	ns	ns	ns	ns	ns	ns	ns	ns	ns	ns	ns	ns	ns
ILMN_1656196	1876	E2F6	ns	s	ns	ns	ns	ns	ns	ns	ns	ns	ns	ns	ns	ns	ns	ns
ILMN_1656232	202134	LOC202134	ns	s	ns	ns	ns	ns	ns	ns	ns	ns	ns	ns	ns	ns	ns	ns
ILMN_1656368	8659	ALDH4A1	ns	s	ns	ns	ns	ns	ns	ns	ns	ns	ns	ns	ns	ns	ns	ns
ILMN_1656372	23481	PES1	ns	s	ns	ns	ns	ns	ns	ns	ns	ns	ns	ns	ns	ns	ns	ns
ILMN_1656420	79014	MGC3020	ns	s	ns	ns	ns	ns	ns	ns	ns	ns	ns	ns	ns	ns	ns	ns
ILMN_1656477	410	ARSA	ns	s	ns	ns	ns	ns	ns	ns	ns	ns	ns	ns	ns	ns	ns	ns
ILMN_1656482	9885	OSBPL2	ns	s	ns	ns	ns	ns	ns	ns	ns	ns	ns	ns	ns	ns	ns	ns
ILMN_1656486	54431	DNAJC10	ns	s	ns	ns	ns	ns	ns	ns	ns	ns	ns	ns	ns	ns	ns	ns
ILMN_1656501	1847	DUSP5	ns	s	ns	ns	ns	ns	ns	ns	ns	ns	ns	ns	ns	ns	ns	ns
ILMN_1656504	57343	ZNF304	ns	s	ns	ns	ns	ns	ns	ns	ns	ns	ns	ns	ns	ns	ns	ns
ILMN_1656589	652537	LOC652537	ns	s	ns	ns	ns	ns	ns	ns	ns	ns	ns	ns	ns	ns	ns	ns
ILMN_1656625	6229	RPS24	ns	s	ns	ns	ns	ns	ns	ns	ns	ns	ns	ns	ns	ns	ns	ns
ILMN_1656678	440423	SUZ12P	ns	s	ns	ns	ns	ns	ns	ns	ns	ns	ns	ns	ns	ns	ns	ns
ILMN_1656822	1785	DNM2	ns	s	ns	ns	ns	ns	ns	ns	ns	ns	ns	ns	ns	ns	ns	ns
ILMN_1656826	57630	SH3RF1	ns	s	ns	ns	ns	ns	ns	ns	ns	ns	ns	ns	ns	ns	ns	ns
ILMN_1656840	55187	VPS13D	ns	s	ns	ns	ns	ns	ns	ns	ns	ns	ns	ns	ns	ns	ns	ns
ILMN_1656886	55957	LIN37	ns	s	ns	ns	ns	ns	ns	ns	ns	ns	ns	ns	ns	ns	ns	ns
ILMN_1656902	79654	HECTD3	ns	s	ns	ns	ns	ns	ns	ns	ns	ns	ns	ns	ns	ns	ns	ns
ILMN_1656913	4190	MDH1	ns	s	ns	ns	ns	ns	ns	ns	ns	ns	ns	ns	ns	ns	ns	ns
ILMN_1656934	9185	REPS2	ns	s	ns	ns	ns	ns	ns	ns	ns	ns	ns	ns	ns	ns	ns	ns
ILMN_1656938	731486	LOC731486	ns	s	ns	ns	ns	ns	ns	ns	ns	ns	ns	ns	ns	ns	ns	ns
ILMN_1656940	22885	ABLIM3	ns	s	ns	ns	ns	ns	ns	ns	ns	ns	ns	ns	ns	ns	ns	ns
ILMN_1657129	8935	SKAP2	ns	s	ns	ns	ns	ns	ns	ns	ns	ns	ns	ns	ns	ns	ns	ns
ILMN_1657144	200205	C1orf69	ns	s	ns	ns	ns	ns	ns	ns	ns	ns	ns	ns	ns	ns	ns	ns
ILMN_1657145	4222	MEOX1	ns	s	ns	ns	ns	ns	ns	ns	ns	ns	ns	ns	ns	ns	ns	ns
ILMN_1657153	10096	ACTR3	ns	s	ns	ns	ns	ns	ns	ns	ns	ns	ns	ns	ns	ns	ns	ns
ILMN_1657204	10055	SAE1	ns	s	ns	ns	ns	ns	ns	ns	ns	ns	ns	ns	ns	ns	ns	ns
ILMN_1657237	10101	NUBP2	ns	s	ns	ns	ns	ns	ns	ns	ns	ns	ns	ns	ns	ns	ns	ns
ILMN_1657361	23492	CBX7	ns	s	ns	ns	ns	ns	ns	ns	ns	ns	ns	ns	ns	ns	ns	ns
ILMN_1657395	3156	HMGCR	ns	s	ns	ns	ns	ns	ns	ns	ns	ns	ns	ns	ns	ns	ns	ns
ILMN_1657398	284757	LOC284757	ns	s	ns	ns	ns	ns	ns	ns	ns	ns	ns	ns	ns	ns	ns	ns
ILMN_1657451	6733	SRPK2	ns	s	ns	ns	ns	ns	ns	ns	ns	ns	ns	ns	ns	ns	ns	ns
ILMN_1657509	283989	TSEN54	ns	s	ns	ns	ns	ns	ns	ns	ns	ns	ns	ns	ns	ns	ns	ns
ILMN_1657547	91057	CCDC34	ns	s	ns	ns	ns	ns	ns	ns	ns	ns	ns	ns	ns	ns	ns	ns
ILMN_1657554	64061	TSPYL2	ns	s	ns	ns	ns	ns	ns	ns	ns	ns	ns	ns	ns	ns	ns	ns
ILMN_1657619	79982	DNAJB14	ns	s	ns	ns	ns	ns	ns	ns	ns	ns	ns	ns	ns	ns	ns	ns
ILMN_1657624	55968	NSFL1C	ns	s	ns	ns	ns	ns	ns	ns	ns	ns	ns	ns	ns	ns	ns	ns
ILMN_1657627	863	CBFA2T3	ns	s	ns	ns	ns	ns	ns	ns	ns	ns	ns	ns	ns	ns	ns	ns
ILMN_1657701	NA	TMEM137	ns	s	ns	ns	ns	ns	ns	ns	ns	ns	ns	ns	ns	ns	ns	ns
ILMN_1657728	643831	LOC643831	ns	s	ns	ns	ns	ns	ns	ns	ns	ns	ns	ns	ns	ns	ns	ns
ILMN_1657754	79871	RPAP2	ns	s	ns	ns	ns	ns	ns	ns	ns	ns	ns	ns	ns	ns	ns	ns
ILMN_1657790	9295	SFRS11	ns	s	ns	ns	ns	ns	ns	ns	ns	ns	ns	ns	ns	ns	ns	ns
ILMN_1657797	9158	FIBP	ns	s	ns	ns	ns	ns	ns	ns	ns	ns	ns	ns	ns	ns	ns	ns
ILMN_1657810	132160	PPM1M	ns	s	ns	ns	ns	ns	ns	ns	ns	ns	ns	ns	ns	ns	ns	ns
ILMN_1657857	51522	TMEM14C	ns	s	ns	ns	ns	ns	ns	ns	ns	ns	ns	ns	ns	ns	ns	ns
ILMN_1657893	10587	TXNRD2	ns	s	ns	ns	ns	ns	ns	ns	ns	ns	ns	ns	ns	ns	ns	ns
ILMN_1657950	401470	RPS26P10	ns	s	ns	ns	ns	ns	ns	ns	ns	ns	ns	ns	ns	ns	ns	ns
ILMN_1657968	5605	MAP2K2	ns	s	ns	ns	ns	ns	ns	ns	ns	ns	ns	ns	ns	ns	ns	ns
ILMN_1658015	10150	MBNL2	ns	s	ns	ns	ns	ns	ns	ns	ns	ns	ns	ns	ns	ns	ns	ns
ILMN_1658053	83658	DYNLRB1	ns	s	ns	ns	ns	ns	ns	ns	ns	ns	ns	ns	ns	ns	ns	ns
ILMN_1658071	481	ATP1B1	ns	s	ns	ns	ns	ns	ns	ns	ns	ns	ns	ns	ns	ns	ns	ns
ILMN_1658083	29777	ABT1	ns	s	ns	ns	ns	ns	ns	ns	ns	ns	ns	ns	ns	ns	ns	ns
ILMN_1658104	89890	KBTBD6	ns	s	ns	ns	ns	ns	ns	ns	ns	ns	ns	ns	ns	ns	ns	ns
ILMN_1658110	125228	C18orf19	ns	s	ns	ns	ns	ns	ns	ns	ns	ns	ns	ns	ns	ns	ns	ns
ILMN_1658176	9619	ABCG1	ns	s	ns	ns	ns	ns	ns	ns	ns	ns	ns	ns	ns	ns	ns	ns
ILMN_1658247	4938	OAS1	ns	s	ns	ns	ns	ns	ns	ns	ns	ns	ns	ns	ns	ns	ns	ns
ILMN_1658283	6139	RPL17	ns	s	ns	ns	ns	ns	ns	ns	ns	ns	ns	ns	ns	ns	ns	ns
ILMN_1658337	79647	C1orf108	ns	s	ns	ns	ns	ns	ns	ns	ns	ns	ns	ns	ns	ns	ns	ns
ILMN_1658351	51024	FIS1	ns	s	ns	ns	ns	ns	ns	ns	ns	ns	ns	ns	ns	ns	ns	ns
ILMN_1658383	3310	HSPA6	ns	s	ns	ns	ns	ns	ns	ns	ns	ns	ns	ns	ns	ns	ns	ns
ILMN_1658407	29015	SLC43A3	ns	s	ns	ns	ns	ns	ns	ns	ns	ns	ns	ns	ns	ns	ns	ns
ILMN_1658469	11257	TP53AP1	ns	s	ns	ns	ns	ns	ns	ns	ns	ns	ns	ns	ns	ns	ns	ns
ILMN_1658481	1716	DGUOK	ns	s	ns	ns	ns	ns	ns	ns	ns	ns	ns	ns	ns	ns	ns	ns
ILMN_1658486	116541	MRPL54	ns	s	ns	ns	ns	ns	ns	ns	ns	ns	ns	ns	ns	ns	ns	ns
ILMN_1658519	64849	SLC13A3	ns	s	ns	ns	ns	ns	ns	ns	ns	ns	ns	ns	ns	ns	ns	ns
ILMN_1658526	6259	RYK	ns	s	ns	ns	ns	ns	ns	ns	ns	ns	ns	ns	ns	ns	ns	ns
ILMN_1658531	653702	LOC653702	ns	s	ns	ns	ns	ns	ns	ns	ns	ns	ns	ns	ns	ns	ns	ns
ILMN_1658632	199713	NLRP7	ns	s	ns	ns	ns	ns	ns	ns	ns	ns	ns	ns	ns	ns	ns	ns
ILMN_1658678	113174	SAAL1	ns	s	ns	ns	ns	ns	ns	ns	ns	ns	ns	ns	ns	ns	ns	ns
ILMN_1658684	374868	ATP9B	ns	s	ns	ns	ns	ns	ns	ns	ns	ns	ns	ns	ns	ns	ns	ns
ILMN_1658697	730953	LOC730953	ns	s	ns	ns	ns	ns	ns	ns	ns	ns	ns	ns	ns	ns	ns	ns
ILMN_1658717	9681	DEPDC5	ns	s	ns	ns	ns	ns	ns	ns	ns	ns	ns	ns	ns	ns	ns	ns
ILMN_1658728	7597	ZBTB25	ns	s	ns	ns	ns	ns	ns	ns	ns	ns	ns	ns	ns	ns	ns	ns
ILMN_1658821	90378	SAMD1	ns	s	ns	ns	ns	ns	ns	ns	ns	ns	ns	ns	ns	ns	ns	ns
ILMN_1658834	124245	ZC3H18	ns	s	ns	ns	ns	ns	ns	ns	ns	ns	ns	ns	ns	ns	ns	ns
ILMN_1658835	858	CAV2	ns	s	ns	ns	ns	ns	ns	ns	ns	ns	ns	ns	ns	ns	ns	ns
ILMN_1658853	9938	ARHGAP25	ns	s	ns	ns	ns	ns	ns	ns	ns	ns	ns	ns	ns	ns	ns	ns
ILMN_1658883	369	ARAF	ns	s	ns	ns	ns	ns	ns	ns	ns	ns	ns	ns	ns	ns	ns	ns
ILMN_1658885	221955	DAGLB	ns	s	ns	ns	ns	ns	ns	ns	ns	ns	ns	ns	ns	ns	ns	ns
ILMN_1658909	64172	OSGEPL1	ns	s	ns	ns	ns	ns	ns	ns	ns	ns	ns	ns	ns	ns	ns	ns
ILMN_1658950	400890	LOC400890	ns	s	ns	ns	ns	ns	ns	ns	ns	ns	ns	ns	ns	ns	ns	ns
ILMN_1658995	23597	ACOT9	ns	s	ns	ns	ns	ns	ns	ns	ns	ns	ns	ns	ns	ns	ns	ns
ILMN_1659017	119710	C11orf74	ns	s	ns	ns	ns	ns	ns	ns	ns	ns	ns	ns	ns	ns	ns	ns
ILMN_1659029	414918	FAM116B	ns	s	ns	ns	ns	ns	ns	ns	ns	ns	ns	ns	ns	ns	ns	ns
ILMN_1659054	1120	CHKB	ns	s	ns	ns	ns	ns	ns	ns	ns	ns	ns	ns	ns	ns	ns	ns
ILMN_1659058	5514	PPP1R10	ns	s	ns	ns	ns	ns	ns	ns	ns	ns	ns	ns	ns	ns	ns	ns
ILMN_1659075	3111	HLA-DOA	ns	s	ns	ns	ns	ns	ns	ns	ns	ns	ns	ns	ns	ns	ns	ns
ILMN_1659077	959	CD40LG	ns	s	ns	ns	ns	ns	ns	ns	ns	ns	ns	ns	ns	ns	ns	ns
ILMN_1659156	54522	ANKRD16	ns	s	ns	ns	ns	ns	ns	ns	ns	ns	ns	ns	ns	ns	ns	ns
ILMN_1659158	154075	SAMD3	ns	s	ns	ns	ns	ns	ns	ns	ns	ns	ns	ns	ns	ns	ns	ns
ILMN_1659189	84270	C9orf89	ns	s	ns	ns	ns	ns	ns	ns	ns	ns	ns	ns	ns	ns	ns	ns
ILMN_1659206	5914	RARA	ns	s	ns	ns	ns	ns	ns	ns	ns	ns	ns	ns	ns	ns	ns	ns
ILMN_1659240	64419	MTMR14	ns	s	ns	ns	ns	ns	ns	ns	ns	ns	ns	ns	ns	ns	ns	ns
ILMN_1659255	6102	RP2	ns	s	ns	ns	ns	ns	ns	ns	ns	ns	ns	ns	ns	ns	ns	ns
ILMN_1659339	26610	ELP4	ns	s	ns	ns	ns	ns	ns	ns	ns	ns	ns	ns	ns	ns	ns	ns
ILMN_1659343	552900	BOLA2	ns	s	ns	ns	ns	ns	ns	ns	ns	ns	ns	ns	ns	ns	ns	ns
ILMN_1659365	653071	LOC653071	ns	s	ns	ns	ns	ns	ns	ns	ns	ns	ns	ns	ns	ns	ns	ns
ILMN_1659444	23095	KIF1B	ns	s	ns	ns	ns	ns	ns	ns	ns	ns	ns	ns	ns	ns	ns	ns
ILMN_1659495	10767	HBS1L	ns	s	ns	ns	ns	ns	ns	ns	ns	ns	ns	ns	ns	ns	ns	ns
ILMN_1659517	112840	WDR89	ns	s	ns	ns	ns	ns	ns	ns	ns	ns	ns	ns	ns	ns	ns	ns
ILMN_1659536	196792	FAM24B	ns	s	ns	ns	ns	ns	ns	ns	ns	ns	ns	ns	ns	ns	ns	ns
ILMN_1659544	6809	STX3	ns	s	ns	ns	ns	ns	ns	ns	ns	ns	ns	ns	ns	ns	ns	ns
ILMN_1659553	64682	ANAPC1	ns	s	ns	ns	ns	ns	ns	ns	ns	ns	ns	ns	ns	ns	ns	ns
ILMN_1659688	3959	LGALS3BP	ns	s	ns	ns	ns	ns	ns	ns	ns	ns	ns	ns	ns	ns	ns	ns
ILMN_1659727	146059	CDAN1	ns	s	ns	ns	ns	ns	ns	ns	ns	ns	ns	ns	ns	ns	ns	ns
ILMN_1659761	92017	SNX29	ns	s	ns	ns	ns	ns	ns	ns	ns	ns	ns	ns	ns	ns	ns	ns
ILMN_1659762	689	BTF3	ns	s	ns	ns	ns	ns	ns	ns	ns	ns	ns	ns	ns	ns	ns	ns
ILMN_1659800	53335	BCL11A	ns	s	ns	ns	ns	ns	ns	ns	ns	ns	ns	ns	ns	ns	ns	ns
ILMN_1659801	528	ATP6V1C1	ns	s	ns	ns	ns	ns	ns	ns	ns	ns	ns	ns	ns	ns	ns	ns
ILMN_1659845	9710	KIAA0355	ns	s	ns	ns	ns	ns	ns	ns	ns	ns	ns	ns	ns	ns	ns	ns
ILMN_1659854	55660	PRPF40A	ns	s	ns	ns	ns	ns	ns	ns	ns	ns	ns	ns	ns	ns	ns	ns
ILMN_1659857	9342	SNAP29	ns	s	ns	ns	ns	ns	ns	ns	ns	ns	ns	ns	ns	ns	ns	ns
ILMN_1659878	5062	PAK2	ns	s	ns	ns	ns	ns	ns	ns	ns	ns	ns	ns	ns	ns	ns	ns
ILMN_1659888	26472	PPP1R14B	ns	s	ns	ns	ns	ns	ns	ns	ns	ns	ns	ns	ns	ns	ns	ns
ILMN_1659937	9841	ZBTB24	ns	s	ns	ns	ns	ns	ns	ns	ns	ns	ns	ns	ns	ns	ns	ns
ILMN_1660000	8926	SNURF	ns	s	ns	ns	ns	ns	ns	ns	ns	ns	ns	ns	ns	ns	ns	ns
ILMN_1660021	10226	M6PRBP1	ns	s	ns	ns	ns	ns	ns	ns	ns	ns	ns	ns	ns	ns	ns	ns
ILMN_1660104	650188	LOC650188	ns	s	ns	ns	ns	ns	ns	ns	ns	ns	ns	ns	ns	ns	ns	ns
ILMN_1660111	7347	UCHL3	ns	s	ns	ns	ns	ns	ns	ns	ns	ns	ns	ns	ns	ns	ns	ns
ILMN_1660193	57711	ZNF529	ns	s	ns	ns	ns	ns	ns	ns	ns	ns	ns	ns	ns	ns	ns	ns
ILMN_1660204	22997	IGSF9B	ns	s	ns	ns	ns	ns	ns	ns	ns	ns	ns	ns	ns	ns	ns	ns
ILMN_1660277	731999	LOC731999	ns	s	ns	ns	ns	ns	ns	ns	ns	ns	ns	ns	ns	ns	ns	ns
ILMN_1660307	649580	LOC649580	ns	s	ns	ns	ns	ns	ns	ns	ns	ns	ns	ns	ns	ns	ns	ns
ILMN_1660341	4043	LRPAP1	ns	s	ns	ns	ns	ns	ns	ns	ns	ns	ns	ns	ns	ns	ns	ns
ILMN_1660343	653080	LOC653080	ns	s	ns	ns	ns	ns	ns	ns	ns	ns	ns	ns	ns	ns	ns	ns
ILMN_1660364	27128	PSCD4	ns	s	ns	ns	ns	ns	ns	ns	ns	ns	ns	ns	ns	ns	ns	ns
ILMN_1660426	10898	CPSF4	ns	s	ns	ns	ns	ns	ns	ns	ns	ns	ns	ns	ns	ns	ns	ns
ILMN_1660439	651149	LOC651149	ns	s	ns	ns	ns	ns	ns	ns	ns	ns	ns	ns	ns	ns	ns	ns
ILMN_1660533	6184	RPN1	ns	s	ns	ns	ns	ns	ns	ns	ns	ns	ns	ns	ns	ns	ns	ns
ILMN_1660551	57585	CRAMP1L	ns	s	ns	ns	ns	ns	ns	ns	ns	ns	ns	ns	ns	ns	ns	ns
ILMN_1660576	646604	LOC646604	ns	s	ns	ns	ns	ns	ns	ns	ns	ns	ns	ns	ns	ns	ns	ns
ILMN_1660579	51379	CRLF3	ns	s	ns	ns	ns	ns	ns	ns	ns	ns	ns	ns	ns	ns	ns	ns
ILMN_1660582	3980	LIG3	ns	s	ns	ns	ns	ns	ns	ns	ns	ns	ns	ns	ns	ns	ns	ns
ILMN_1660602	25912	C1orf43	ns	s	ns	ns	ns	ns	ns	ns	ns	ns	ns	ns	ns	ns	ns	ns
ILMN_1660669	653073	LOC653073	ns	s	ns	ns	ns	ns	ns	ns	ns	ns	ns	ns	ns	ns	ns	ns
ILMN_1660698	29083	GTPBP8	ns	s	ns	ns	ns	ns	ns	ns	ns	ns	ns	ns	ns	ns	ns	ns
ILMN_1660732	5521	PPP2R2B	ns	s	ns	ns	ns	ns	ns	ns	ns	ns	ns	ns	ns	ns	ns	ns
ILMN_1660787	8803	SUCLA2	ns	s	ns	ns	ns	ns	ns	ns	ns	ns	ns	ns	ns	ns	ns	ns
ILMN_1660793	124222	PAQR4	ns	s	ns	ns	ns	ns	ns	ns	ns	ns	ns	ns	ns	ns	ns	ns
ILMN_1660794	81606	LBH	ns	s	ns	ns	ns	ns	ns	ns	ns	ns	ns	ns	ns	ns	ns	ns
ILMN_1660812	55837	C14orf11	ns	s	ns	ns	ns	ns	ns	ns	ns	ns	ns	ns	ns	ns	ns	ns
ILMN_1660817	1643	DDB2	ns	s	ns	ns	ns	ns	ns	ns	ns	ns	ns	ns	ns	ns	ns	ns
ILMN_1660840	51029	FAM152A	ns	s	ns	ns	ns	ns	ns	ns	ns	ns	ns	ns	ns	ns	ns	ns
ILMN_1660907	5791	PTPRE	ns	s	ns	ns	ns	ns	ns	ns	ns	ns	ns	ns	ns	ns	ns	ns
ILMN_1660923	NA	HCG4	ns	s	ns	ns	ns	ns	ns	ns	ns	ns	ns	ns	ns	ns	ns	ns
ILMN_1661000	26750	RPS6KC1	ns	s	ns	ns	ns	ns	ns	ns	ns	ns	ns	ns	ns	ns	ns	ns
ILMN_1661002	64326	RFWD2	ns	s	ns	ns	ns	ns	ns	ns	ns	ns	ns	ns	ns	ns	ns	ns
ILMN_1661172	650034	LOC650034	ns	s	ns	ns	ns	ns	ns	ns	ns	ns	ns	ns	ns	ns	ns	ns
ILMN_1661173	9325	TRIP4	ns	s	ns	ns	ns	ns	ns	ns	ns	ns	ns	ns	ns	ns	ns	ns
ILMN_1661194	23562	CLDN14	ns	s	ns	ns	ns	ns	ns	ns	ns	ns	ns	ns	ns	ns	ns	ns
ILMN_1661197	23529	CLCF1	ns	s	ns	ns	ns	ns	ns	ns	ns	ns	ns	ns	ns	ns	ns	ns
ILMN_1661293	7767	ZNF224	ns	s	ns	ns	ns	ns	ns	ns	ns	ns	ns	ns	ns	ns	ns	ns
ILMN_1661399	649604	LOC649604	ns	s	ns	ns	ns	ns	ns	ns	ns	ns	ns	ns	ns	ns	ns	ns
ILMN_1661424	152815	THAP6	ns	s	ns	ns	ns	ns	ns	ns	ns	ns	ns	ns	ns	ns	ns	ns
ILMN_1661485	23029	RBM34	ns	s	ns	ns	ns	ns	ns	ns	ns	ns	ns	ns	ns	ns	ns	ns
ILMN_1661488	729905	LOC729905	ns	s	ns	ns	ns	ns	ns	ns	ns	ns	ns	ns	ns	ns	ns	ns
ILMN_1661593	51030	FAM18B	ns	s	ns	ns	ns	ns	ns	ns	ns	ns	ns	ns	ns	ns	ns	ns
ILMN_1661599	54541	DDIT4	ns	s	ns	ns	ns	ns	ns	ns	ns	ns	ns	ns	ns	ns	ns	ns
ILMN_1661627	84328	LZIC	ns	s	ns	ns	ns	ns	ns	ns	ns	ns	ns	ns	ns	ns	ns	ns
ILMN_1661631	11026	LILRA3	ns	s	ns	ns	ns	ns	ns	ns	ns	ns	ns	ns	ns	ns	ns	ns
ILMN_1661667	652721	LOC652721	ns	s	ns	ns	ns	ns	ns	ns	ns	ns	ns	ns	ns	ns	ns	ns
ILMN_1661770	23081	JMJD2C	ns	s	ns	ns	ns	ns	ns	ns	ns	ns	ns	ns	ns	ns	ns	ns
ILMN_1661777	4306	NR3C2	ns	s	ns	ns	ns	ns	ns	ns	ns	ns	ns	ns	ns	ns	ns	ns
ILMN_1661875	288	ANK3	ns	s	ns	ns	ns	ns	ns	ns	ns	ns	ns	ns	ns	ns	ns	ns
ILMN_1661903	1539	CYLC2	ns	s	ns	ns	ns	ns	ns	ns	ns	ns	ns	ns	ns	ns	ns	ns
ILMN_1662016	90507	SCRN2	ns	s	ns	ns	ns	ns	ns	ns	ns	ns	ns	ns	ns	ns	ns	ns
ILMN_1662021	284695	ZNF326	ns	s	ns	ns	ns	ns	ns	ns	ns	ns	ns	ns	ns	ns	ns	ns
ILMN_1662128	57461	ISY1	ns	s	ns	ns	ns	ns	ns	ns	ns	ns	ns	ns	ns	ns	ns	ns
ILMN_1662161	54662	TBC1D13	ns	s	ns	ns	ns	ns	ns	ns	ns	ns	ns	ns	ns	ns	ns	ns
ILMN_1662184	375444	C5orf34	ns	s	ns	ns	ns	ns	ns	ns	ns	ns	ns	ns	ns	ns	ns	ns
ILMN_1662340	140467	ZNF358	ns	s	ns	ns	ns	ns	ns	ns	ns	ns	ns	ns	ns	ns	ns	ns
ILMN_1662359	8362	HIST1H4K	ns	s	ns	ns	ns	ns	ns	ns	ns	ns	ns	ns	ns	ns	ns	ns
ILMN_1662453	93166	PRDM6	ns	s	ns	ns	ns	ns	ns	ns	ns	ns	ns	ns	ns	ns	ns	ns
ILMN_1662484	51208	CLDN18	ns	s	ns	ns	ns	ns	ns	ns	ns	ns	ns	ns	ns	ns	ns	ns
ILMN_1662658	80324	PUS1	ns	s	ns	ns	ns	ns	ns	ns	ns	ns	ns	ns	ns	ns	ns	ns
ILMN_1662751	645722	LOC645722	ns	s	ns	ns	ns	ns	ns	ns	ns	ns	ns	ns	ns	ns	ns	ns
ILMN_1662799	63940	GPSM3	ns	s	ns	ns	ns	ns	ns	ns	ns	ns	ns	ns	ns	ns	ns	ns
ILMN_1662839	59338	PLEKHA1	ns	s	ns	ns	ns	ns	ns	ns	ns	ns	ns	ns	ns	ns	ns	ns
ILMN_1662843	963	CD53	ns	s	ns	ns	ns	ns	ns	ns	ns	ns	ns	ns	ns	ns	ns	ns
ILMN_1662846	26996	GPR160	ns	s	ns	ns	ns	ns	ns	ns	ns	ns	ns	ns	ns	ns	ns	ns
ILMN_1662848	79770	TXNDC15	ns	s	ns	ns	ns	ns	ns	ns	ns	ns	ns	ns	ns	ns	ns	ns
ILMN_1662865	55313	FLJ11151	ns	s	ns	ns	ns	ns	ns	ns	ns	ns	ns	ns	ns	ns	ns	ns
ILMN_1663002	30968	STOML2	ns	s	ns	ns	ns	ns	ns	ns	ns	ns	ns	ns	ns	ns	ns	ns
ILMN_1663054	653199	LOC653199	ns	s	ns	ns	ns	ns	ns	ns	ns	ns	ns	ns	ns	ns	ns	ns
ILMN_1663080	3955	LFNG	ns	s	ns	ns	ns	ns	ns	ns	ns	ns	ns	ns	ns	ns	ns	ns
ILMN_1663092	10370	CITED2	ns	s	ns	ns	ns	ns	ns	ns	ns	ns	ns	ns	ns	ns	ns	ns
ILMN_1663113	23170	TTLL12	ns	s	ns	ns	ns	ns	ns	ns	ns	ns	ns	ns	ns	ns	ns	ns
ILMN_1663149	6729	SRP54	ns	s	ns	ns	ns	ns	ns	ns	ns	ns	ns	ns	ns	ns	ns	ns
ILMN_1663347	9381	OTOF	ns	s	ns	ns	ns	ns	ns	ns	ns	ns	ns	ns	ns	ns	ns	ns
ILMN_1663379	79176	FBXL15	ns	s	ns	ns	ns	ns	ns	ns	ns	ns	ns	ns	ns	ns	ns	ns
ILMN_1663383	25929	GEMIN5	ns	s	ns	ns	ns	ns	ns	ns	ns	ns	ns	ns	ns	ns	ns	ns
ILMN_1663390	991	CDC20	ns	s	ns	ns	ns	ns	ns	ns	ns	ns	ns	ns	ns	ns	ns	ns
ILMN_1663422	266747	RGL4	ns	s	ns	ns	ns	ns	ns	ns	ns	ns	ns	ns	ns	ns	ns	ns
ILMN_1663437	54550	NECAB2	ns	s	ns	ns	ns	ns	ns	ns	ns	ns	ns	ns	ns	ns	ns	ns
ILMN_1663484	25764	HYPK	ns	s	ns	ns	ns	ns	ns	ns	ns	ns	ns	ns	ns	ns	ns	ns
ILMN_1663486	11011	TLK2	ns	s	ns	ns	ns	ns	ns	ns	ns	ns	ns	ns	ns	ns	ns	ns
ILMN_1663493	221960	C7orf28B	ns	s	ns	ns	ns	ns	ns	ns	ns	ns	ns	ns	ns	ns	ns	ns
ILMN_1663562	346528	OR2A1	ns	s	ns	ns	ns	ns	ns	ns	ns	ns	ns	ns	ns	ns	ns	ns
ILMN_1663577	64766	S100PBP	ns	s	ns	ns	ns	ns	ns	ns	ns	ns	ns	ns	ns	ns	ns	ns
ILMN_1663618	6774	STAT3	ns	s	ns	ns	ns	ns	ns	ns	ns	ns	ns	ns	ns	ns	ns	ns
ILMN_1663631	54971	BANP	ns	s	ns	ns	ns	ns	ns	ns	ns	ns	ns	ns	ns	ns	ns	ns
ILMN_1663646	1657	DMXL1	ns	s	ns	ns	ns	ns	ns	ns	ns	ns	ns	ns	ns	ns	ns	ns
ILMN_1663667	80308	FLAD1	ns	s	ns	ns	ns	ns	ns	ns	ns	ns	ns	ns	ns	ns	ns	ns
ILMN_1663685	8214	DGCR6	ns	s	ns	ns	ns	ns	ns	ns	ns	ns	ns	ns	ns	ns	ns	ns
ILMN_1663718	375612	LHFPL3	ns	s	ns	ns	ns	ns	ns	ns	ns	ns	ns	ns	ns	ns	ns	ns
ILMN_1663786	2035	EPB41	ns	s	ns	ns	ns	ns	ns	ns	ns	ns	ns	ns	ns	ns	ns	ns
ILMN_1663799	6161	RPL32	ns	s	ns	ns	ns	ns	ns	ns	ns	ns	ns	ns	ns	ns	ns	ns
ILMN_1663802	NA	PLGLA	ns	s	ns	ns	ns	ns	ns	ns	ns	ns	ns	ns	ns	ns	ns	ns
ILMN_1663858	57335	ZNF286A	ns	s	ns	ns	ns	ns	ns	ns	ns	ns	ns	ns	ns	ns	ns	ns
ILMN_1663916	64333	ARHGAP9	ns	s	ns	ns	ns	ns	ns	ns	ns	ns	ns	ns	ns	ns	ns	ns
ILMN_1663954	51497	TH1L	ns	s	ns	ns	ns	ns	ns	ns	ns	ns	ns	ns	ns	ns	ns	ns
ILMN_1664012	124583	CANT1	ns	s	ns	ns	ns	ns	ns	ns	ns	ns	ns	ns	ns	ns	ns	ns
ILMN_1664016	23370	ARHGEF18	ns	s	ns	ns	ns	ns	ns	ns	ns	ns	ns	ns	ns	ns	ns	ns
ILMN_1664098	10922	FASTK	ns	s	ns	ns	ns	ns	ns	ns	ns	ns	ns	ns	ns	ns	ns	ns
ILMN_1664153	64924	SLC30A5	ns	s	ns	ns	ns	ns	ns	ns	ns	ns	ns	ns	ns	ns	ns	ns
ILMN_1664176	10516	FBLN5	ns	s	ns	ns	ns	ns	ns	ns	ns	ns	ns	ns	ns	ns	ns	ns
ILMN_1664216	28512	NKIRAS1	ns	s	ns	ns	ns	ns	ns	ns	ns	ns	ns	ns	ns	ns	ns	ns
ILMN_1664292	55786	ZNF415	ns	s	ns	ns	ns	ns	ns	ns	ns	ns	ns	ns	ns	ns	ns	ns
ILMN_1664294	64175	LEPRE1	ns	s	ns	ns	ns	ns	ns	ns	ns	ns	ns	ns	ns	ns	ns	ns
ILMN_1664424	58486	ZBED5	ns	s	ns	ns	ns	ns	ns	ns	ns	ns	ns	ns	ns	ns	ns	ns
ILMN_1664434	6929	TCF3	ns	s	ns	ns	ns	ns	ns	ns	ns	ns	ns	ns	ns	ns	ns	ns
ILMN_1664449	29880	ALG5	ns	s	ns	ns	ns	ns	ns	ns	ns	ns	ns	ns	ns	ns	ns	ns
ILMN_1664641	29079	MED4	ns	s	ns	ns	ns	ns	ns	ns	ns	ns	ns	ns	ns	ns	ns	ns
ILMN_1664682	1763	DNA2	ns	s	ns	ns	ns	ns	ns	ns	ns	ns	ns	ns	ns	ns	ns	ns
ILMN_1664698	9094	UNC119	ns	s	ns	ns	ns	ns	ns	ns	ns	ns	ns	ns	ns	ns	ns	ns
ILMN_1664738	28970	C11orf54	ns	s	ns	ns	ns	ns	ns	ns	ns	ns	ns	ns	ns	ns	ns	ns
ILMN_1664833	54534	MRPL50	ns	s	ns	ns	ns	ns	ns	ns	ns	ns	ns	ns	ns	ns	ns	ns
ILMN_1664920	83636	C19orf12	ns	s	ns	ns	ns	ns	ns	ns	ns	ns	ns	ns	ns	ns	ns	ns
ILMN_1664921	5537	PPP6C	ns	s	ns	ns	ns	ns	ns	ns	ns	ns	ns	ns	ns	ns	ns	ns
ILMN_1664922	2317	FLNB	ns	s	ns	ns	ns	ns	ns	ns	ns	ns	ns	ns	ns	ns	ns	ns
ILMN_1665205	339324	ZNF260	ns	s	ns	ns	ns	ns	ns	ns	ns	ns	ns	ns	ns	ns	ns	ns
ILMN_1665212	23644	EDC4	ns	s	ns	ns	ns	ns	ns	ns	ns	ns	ns	ns	ns	ns	ns	ns
ILMN_1665217	84984	C3orf34	ns	s	ns	ns	ns	ns	ns	ns	ns	ns	ns	ns	ns	ns	ns	ns
ILMN_1665280	28972	SPCS1	ns	s	ns	ns	ns	ns	ns	ns	ns	ns	ns	ns	ns	ns	ns	ns
ILMN_1665332	653157	LOC653157	ns	s	ns	ns	ns	ns	ns	ns	ns	ns	ns	ns	ns	ns	ns	ns
ILMN_1665335	56616	DIABLO	ns	s	ns	ns	ns	ns	ns	ns	ns	ns	ns	ns	ns	ns	ns	ns
ILMN_1665457	170482	CLEC4C	ns	s	ns	ns	ns	ns	ns	ns	ns	ns	ns	ns	ns	ns	ns	ns
ILMN_1665483	9933	KIAA0020	ns	s	ns	ns	ns	ns	ns	ns	ns	ns	ns	ns	ns	ns	ns	ns
ILMN_1665540	728417	LOC728417	ns	s	ns	ns	ns	ns	ns	ns	ns	ns	ns	ns	ns	ns	ns	ns
ILMN_1665554	55290	BRF2	ns	s	ns	ns	ns	ns	ns	ns	ns	ns	ns	ns	ns	ns	ns	ns
ILMN_1665557	9958	USP15	ns	s	ns	ns	ns	ns	ns	ns	ns	ns	ns	ns	ns	ns	ns	ns
ILMN_1665571	644869	LOC644869	ns	s	ns	ns	ns	ns	ns	ns	ns	ns	ns	ns	ns	ns	ns	ns
ILMN_1665601	728944	LOC728944	ns	s	ns	ns	ns	ns	ns	ns	ns	ns	ns	ns	ns	ns	ns	ns
ILMN_1665823	389787	LOC389787	ns	s	ns	ns	ns	ns	ns	ns	ns	ns	ns	ns	ns	ns	ns	ns
ILMN_1665877	284996	RNF149	ns	s	ns	ns	ns	ns	ns	ns	ns	ns	ns	ns	ns	ns	ns	ns
ILMN_1665887	80349	WDR61	ns	s	ns	ns	ns	ns	ns	ns	ns	ns	ns	ns	ns	ns	ns	ns
ILMN_1665982	64400	AKTIP	ns	s	ns	ns	ns	ns	ns	ns	ns	ns	ns	ns	ns	ns	ns	ns
ILMN_1666004	8976	WASL	ns	s	ns	ns	ns	ns	ns	ns	ns	ns	ns	ns	ns	ns	ns	ns
ILMN_1666078	NA	HLA-H	ns	s	ns	ns	ns	ns	ns	ns	ns	ns	ns	ns	ns	ns	ns	ns
ILMN_1666082	55027	HEATR3	ns	s	ns	ns	ns	ns	ns	ns	ns	ns	ns	ns	ns	ns	ns	ns
ILMN_1666156	9643	MORF4L2	ns	s	ns	ns	ns	ns	ns	ns	ns	ns	ns	ns	ns	ns	ns	ns
ILMN_1666179	126961	HIST2H3C	ns	s	ns	ns	ns	ns	ns	ns	ns	ns	ns	ns	ns	ns	ns	ns
ILMN_1666269	1522	CTSZ	ns	s	ns	ns	ns	ns	ns	ns	ns	ns	ns	ns	ns	ns	ns	ns
ILMN_1666280	1353	COX11	ns	s	ns	ns	ns	ns	ns	ns	ns	ns	ns	ns	ns	ns	ns	ns
ILMN_1666305	1033	CDKN3	ns	s	ns	ns	ns	ns	ns	ns	ns	ns	ns	ns	ns	ns	ns	ns
ILMN_1666546	11072	DUSP14	ns	s	ns	ns	ns	ns	ns	ns	ns	ns	ns	ns	ns	ns	ns	ns
ILMN_1666564	652489	LOC652489	ns	s	ns	ns	ns	ns	ns	ns	ns	ns	ns	ns	ns	ns	ns	ns
ILMN_1666597	5298	PI4KB	ns	s	ns	ns	ns	ns	ns	ns	ns	ns	ns	ns	ns	ns	ns	ns
ILMN_1666615	9581	PREPL	ns	s	ns	ns	ns	ns	ns	ns	ns	ns	ns	ns	ns	ns	ns	ns
ILMN_1666633	202020	FLJ39653	ns	s	ns	ns	ns	ns	ns	ns	ns	ns	ns	ns	ns	ns	ns	ns
ILMN_1666727	54807	ZNF586	ns	s	ns	ns	ns	ns	ns	ns	ns	ns	ns	ns	ns	ns	ns	ns
ILMN_1666742	203228	C9orf72	ns	s	ns	ns	ns	ns	ns	ns	ns	ns	ns	ns	ns	ns	ns	ns
ILMN_1666933	9070	ASH2L	ns	s	ns	ns	ns	ns	ns	ns	ns	ns	ns	ns	ns	ns	ns	ns
ILMN_1666967	51660	BRP44L	ns	s	ns	ns	ns	ns	ns	ns	ns	ns	ns	ns	ns	ns	ns	ns
ILMN_1667022	23178	PASK	ns	s	ns	ns	ns	ns	ns	ns	ns	ns	ns	ns	ns	ns	ns	ns
ILMN_1667081	894	CCND2	ns	s	ns	ns	ns	ns	ns	ns	ns	ns	ns	ns	ns	ns	ns	ns
ILMN_1667169	440349	LOC440349	ns	s	ns	ns	ns	ns	ns	ns	ns	ns	ns	ns	ns	ns	ns	ns
ILMN_1667199	58472	SQRDL	ns	s	ns	ns	ns	ns	ns	ns	ns	ns	ns	ns	ns	ns	ns	ns
ILMN_1667201	282809	WDR51B	ns	s	ns	ns	ns	ns	ns	ns	ns	ns	ns	ns	ns	ns	ns	ns
ILMN_1667213	1676	DFFA	ns	s	ns	ns	ns	ns	ns	ns	ns	ns	ns	ns	ns	ns	ns	ns
ILMN_1667222	4580	MTX1	ns	s	ns	ns	ns	ns	ns	ns	ns	ns	ns	ns	ns	ns	ns	ns
ILMN_1667232	3804	KIR2DL3	ns	s	ns	ns	ns	ns	ns	ns	ns	ns	ns	ns	ns	ns	ns	ns
ILMN_1667306	57610	RANBP10	ns	s	ns	ns	ns	ns	ns	ns	ns	ns	ns	ns	ns	ns	ns	ns
ILMN_1667429	788	SLC25A20	ns	s	ns	ns	ns	ns	ns	ns	ns	ns	ns	ns	ns	ns	ns	ns
ILMN_1667432	8372	HYAL3	ns	s	ns	ns	ns	ns	ns	ns	ns	ns	ns	ns	ns	ns	ns	ns
ILMN_1667460	55959	SULF2	ns	s	ns	ns	ns	ns	ns	ns	ns	ns	ns	ns	ns	ns	ns	ns
ILMN_1667577	9836	LCMT2	ns	s	ns	ns	ns	ns	ns	ns	ns	ns	ns	ns	ns	ns	ns	ns
ILMN_1667670	10166	SLC25A15	ns	s	ns	ns	ns	ns	ns	ns	ns	ns	ns	ns	ns	ns	ns	ns
ILMN_1667716	84336	TMEM101	ns	s	ns	ns	ns	ns	ns	ns	ns	ns	ns	ns	ns	ns	ns	ns
ILMN_1667744	65258	MPPE1	ns	s	ns	ns	ns	ns	ns	ns	ns	ns	ns	ns	ns	ns	ns	ns
ILMN_1667839	55148	C14orf130	ns	s	ns	ns	ns	ns	ns	ns	ns	ns	ns	ns	ns	ns	ns	ns
ILMN_1667883	8563	THOC5	ns	s	ns	ns	ns	ns	ns	ns	ns	ns	ns	ns	ns	ns	ns	ns
ILMN_1667893	64759	TNS3	ns	s	ns	ns	ns	ns	ns	ns	ns	ns	ns	ns	ns	ns	ns	ns
ILMN_1667994	262	AMD1	ns	s	ns	ns	ns	ns	ns	ns	ns	ns	ns	ns	ns	ns	ns	ns
ILMN_1668351	6878	TAF6	ns	s	ns	ns	ns	ns	ns	ns	ns	ns	ns	ns	ns	ns	ns	ns
ILMN_1668359	642815	LOC642815	ns	s	ns	ns	ns	ns	ns	ns	ns	ns	ns	ns	ns	ns	ns	ns
ILMN_1668374	3693	ITGB5	ns	s	ns	ns	ns	ns	ns	ns	ns	ns	ns	ns	ns	ns	ns	ns
ILMN_1668498	143884	CWF19L2	ns	s	ns	ns	ns	ns	ns	ns	ns	ns	ns	ns	ns	ns	ns	ns
ILMN_1668540	54680	C1orf181	ns	s	ns	ns	ns	ns	ns	ns	ns	ns	ns	ns	ns	ns	ns	ns
ILMN_1668605	27163	ASAHL	ns	s	ns	ns	ns	ns	ns	ns	ns	ns	ns	ns	ns	ns	ns	ns
ILMN_1668619	57613	KIAA1467	ns	s	ns	ns	ns	ns	ns	ns	ns	ns	ns	ns	ns	ns	ns	ns
ILMN_1668748	51586	MED15	ns	s	ns	ns	ns	ns	ns	ns	ns	ns	ns	ns	ns	ns	ns	ns
ILMN_1668771	642946	LOC642946	ns	s	ns	ns	ns	ns	ns	ns	ns	ns	ns	ns	ns	ns	ns	ns
ILMN_1668865	144195	SLC2A14	ns	s	ns	ns	ns	ns	ns	ns	ns	ns	ns	ns	ns	ns	ns	ns
ILMN_1668910	27141	CIDEB	ns	s	ns	ns	ns	ns	ns	ns	ns	ns	ns	ns	ns	ns	ns	ns
ILMN_1668924	57596	BEGAIN	ns	s	ns	ns	ns	ns	ns	ns	ns	ns	ns	ns	ns	ns	ns	ns
ILMN_1668929	9720	KIAA0565	ns	s	ns	ns	ns	ns	ns	ns	ns	ns	ns	ns	ns	ns	ns	ns
ILMN_1668985	653855	LOC653855	ns	s	ns	ns	ns	ns	ns	ns	ns	ns	ns	ns	ns	ns	ns	ns
ILMN_1669057	642921	LOC642921	ns	s	ns	ns	ns	ns	ns	ns	ns	ns	ns	ns	ns	ns	ns	ns
ILMN_1669062	1231	CCR2	ns	s	ns	ns	ns	ns	ns	ns	ns	ns	ns	ns	ns	ns	ns	ns
ILMN_1669201	10061	ABCF2	ns	s	ns	ns	ns	ns	ns	ns	ns	ns	ns	ns	ns	ns	ns	ns
ILMN_1669206	23019	CNOT1	ns	s	ns	ns	ns	ns	ns	ns	ns	ns	ns	ns	ns	ns	ns	ns
ILMN_1669281	1201	CLN3	ns	s	ns	ns	ns	ns	ns	ns	ns	ns	ns	ns	ns	ns	ns	ns
ILMN_1669310	89941	RHOT2	ns	s	ns	ns	ns	ns	ns	ns	ns	ns	ns	ns	ns	ns	ns	ns
ILMN_1669393	2678	GGT1	ns	s	ns	ns	ns	ns	ns	ns	ns	ns	ns	ns	ns	ns	ns	ns
ILMN_1669497	114884	OSBPL10	ns	s	ns	ns	ns	ns	ns	ns	ns	ns	ns	ns	ns	ns	ns	ns
ILMN_1669598	51111	SUV420H1	ns	s	ns	ns	ns	ns	ns	ns	ns	ns	ns	ns	ns	ns	ns	ns
ILMN_1669635	79902	NUP85	ns	s	ns	ns	ns	ns	ns	ns	ns	ns	ns	ns	ns	ns	ns	ns
ILMN_1669696	126375	ZNF792	ns	s	ns	ns	ns	ns	ns	ns	ns	ns	ns	ns	ns	ns	ns	ns
ILMN_1669715	285407	LOC285407	ns	s	ns	ns	ns	ns	ns	ns	ns	ns	ns	ns	ns	ns	ns	ns
ILMN_1669940	55151	TMEM38B	ns	s	ns	ns	ns	ns	ns	ns	ns	ns	ns	ns	ns	ns	ns	ns
ILMN_1670000	55827	IQWD1	ns	s	ns	ns	ns	ns	ns	ns	ns	ns	ns	ns	ns	ns	ns	ns
ILMN_1670037	5441	POLR2L	ns	s	ns	ns	ns	ns	ns	ns	ns	ns	ns	ns	ns	ns	ns	ns
ILMN_1670076	27112	FAM155B	ns	s	ns	ns	ns	ns	ns	ns	ns	ns	ns	ns	ns	ns	ns	ns
ILMN_1670096	29959	NRBP1	ns	s	ns	ns	ns	ns	ns	ns	ns	ns	ns	ns	ns	ns	ns	ns
ILMN_1670130	1820	ARID3A	ns	s	ns	ns	ns	ns	ns	ns	ns	ns	ns	ns	ns	ns	ns	ns
ILMN_1670305	710	SERPING1	ns	s	ns	ns	ns	ns	ns	ns	ns	ns	ns	ns	ns	ns	ns	ns
ILMN_1670353	10635	RAD51AP1	ns	s	ns	ns	ns	ns	ns	ns	ns	ns	ns	ns	ns	ns	ns	ns
ILMN_1670377	7568	ZNF20	ns	s	ns	ns	ns	ns	ns	ns	ns	ns	ns	ns	ns	ns	ns	ns
ILMN_1670452	84210	ANKRD20A1	ns	s	ns	ns	ns	ns	ns	ns	ns	ns	ns	ns	ns	ns	ns	ns
ILMN_1670503	56950	SMYD2	ns	s	ns	ns	ns	ns	ns	ns	ns	ns	ns	ns	ns	ns	ns	ns
ILMN_1670532	64395	GMCL1	ns	s	ns	ns	ns	ns	ns	ns	ns	ns	ns	ns	ns	ns	ns	ns
ILMN_1670542	204	AK2	ns	s	ns	ns	ns	ns	ns	ns	ns	ns	ns	ns	ns	ns	ns	ns
ILMN_1670638	26207	PITPNC1	ns	s	ns	ns	ns	ns	ns	ns	ns	ns	ns	ns	ns	ns	ns	ns
ILMN_1670640	144348	ZNF664	ns	s	ns	ns	ns	ns	ns	ns	ns	ns	ns	ns	ns	ns	ns	ns
ILMN_1670796	5394	EXOSC10	ns	s	ns	ns	ns	ns	ns	ns	ns	ns	ns	ns	ns	ns	ns	ns
ILMN_1670801	4548	MTR	ns	s	ns	ns	ns	ns	ns	ns	ns	ns	ns	ns	ns	ns	ns	ns
ILMN_1670807	157638	FAM84B	ns	s	ns	ns	ns	ns	ns	ns	ns	ns	ns	ns	ns	ns	ns	ns
ILMN_1670925	124637	CYB5D1	ns	s	ns	ns	ns	ns	ns	ns	ns	ns	ns	ns	ns	ns	ns	ns
ILMN_1671005	359948	IRF2BP2	ns	s	ns	ns	ns	ns	ns	ns	ns	ns	ns	ns	ns	ns	ns	ns
ILMN_1671039	2591	GALNT3	ns	s	ns	ns	ns	ns	ns	ns	ns	ns	ns	ns	ns	ns	ns	ns
ILMN_1671048	84146	ZNF644	ns	s	ns	ns	ns	ns	ns	ns	ns	ns	ns	ns	ns	ns	ns	ns
ILMN_1671054	3105	HLA-A	ns	s	ns	ns	ns	ns	ns	ns	ns	ns	ns	ns	ns	ns	ns	ns
ILMN_1671152	649801	LOC649801	ns	s	ns	ns	ns	ns	ns	ns	ns	ns	ns	ns	ns	ns	ns	ns
ILMN_1671183	648749	LOC648749	ns	s	ns	ns	ns	ns	ns	ns	ns	ns	ns	ns	ns	ns	ns	ns
ILMN_1671237	2793	GNGT2	ns	s	ns	ns	ns	ns	ns	ns	ns	ns	ns	ns	ns	ns	ns	ns
ILMN_1671257	1736	DKC1	ns	s	ns	ns	ns	ns	ns	ns	ns	ns	ns	ns	ns	ns	ns	ns
ILMN_1671270	2013	EMP2	ns	s	ns	ns	ns	ns	ns	ns	ns	ns	ns	ns	ns	ns	ns	ns
ILMN_1671486	9455	HOMER2	ns	s	ns	ns	ns	ns	ns	ns	ns	ns	ns	ns	ns	ns	ns	ns
ILMN_1671516	9541	CIR	ns	s	ns	ns	ns	ns	ns	ns	ns	ns	ns	ns	ns	ns	ns	ns
ILMN_1671565	8635	RNASET2	ns	s	ns	ns	ns	ns	ns	ns	ns	ns	ns	ns	ns	ns	ns	ns
ILMN_1671621	5110	PCMT1	ns	s	ns	ns	ns	ns	ns	ns	ns	ns	ns	ns	ns	ns	ns	ns
ILMN_1671765	23087	TRIM35	ns	s	ns	ns	ns	ns	ns	ns	ns	ns	ns	ns	ns	ns	ns	ns
ILMN_1671766	2161	F12	ns	s	ns	ns	ns	ns	ns	ns	ns	ns	ns	ns	ns	ns	ns	ns
ILMN_1671818	10911	UTS2	ns	s	ns	ns	ns	ns	ns	ns	ns	ns	ns	ns	ns	ns	ns	ns
ILMN_1671843	84722	PSRC1	ns	s	ns	ns	ns	ns	ns	ns	ns	ns	ns	ns	ns	ns	ns	ns
ILMN_1671902	25917	THUMPD3	ns	s	ns	ns	ns	ns	ns	ns	ns	ns	ns	ns	ns	ns	ns	ns
ILMN_1671911	9112	MTA1	ns	s	ns	ns	ns	ns	ns	ns	ns	ns	ns	ns	ns	ns	ns	ns
ILMN_1671928	5627	PROS1	ns	s	ns	ns	ns	ns	ns	ns	ns	ns	ns	ns	ns	ns	ns	ns
ILMN_1671932	25813	SAMM50	ns	s	ns	ns	ns	ns	ns	ns	ns	ns	ns	ns	ns	ns	ns	ns
ILMN_1671935	646103	LOC646103	ns	s	ns	ns	ns	ns	ns	ns	ns	ns	ns	ns	ns	ns	ns	ns
ILMN_1672004	10140	TOB1	ns	s	ns	ns	ns	ns	ns	ns	ns	ns	ns	ns	ns	ns	ns	ns
ILMN_1672009	130773	LOC130773	ns	s	ns	ns	ns	ns	ns	ns	ns	ns	ns	ns	ns	ns	ns	ns
ILMN_1672122	54681	PH-4	ns	s	ns	ns	ns	ns	ns	ns	ns	ns	ns	ns	ns	ns	ns	ns
ILMN_1672165	643453	LOC643453	ns	s	ns	ns	ns	ns	ns	ns	ns	ns	ns	ns	ns	ns	ns	ns
ILMN_1672287	55892	MYNN	ns	s	ns	ns	ns	ns	ns	ns	ns	ns	ns	ns	ns	ns	ns	ns
ILMN_1672295	80149	ZC3H12A	ns	s	ns	ns	ns	ns	ns	ns	ns	ns	ns	ns	ns	ns	ns	ns
ILMN_1672389	1429	CRYZ	ns	s	ns	ns	ns	ns	ns	ns	ns	ns	ns	ns	ns	ns	ns	ns
ILMN_1672443	5860	QDPR	ns	s	ns	ns	ns	ns	ns	ns	ns	ns	ns	ns	ns	ns	ns	ns
ILMN_1672547	4650	MYO9B	ns	s	ns	ns	ns	ns	ns	ns	ns	ns	ns	ns	ns	ns	ns	ns
ILMN_1672564	NA	FMO6P	ns	s	ns	ns	ns	ns	ns	ns	ns	ns	ns	ns	ns	ns	ns	ns
ILMN_1672565	54931	RG9MTD1	ns	s	ns	ns	ns	ns	ns	ns	ns	ns	ns	ns	ns	ns	ns	ns
ILMN_1672589	10509	SEMA4B	ns	s	ns	ns	ns	ns	ns	ns	ns	ns	ns	ns	ns	ns	ns	ns
ILMN_1672626	2995	GYPC	ns	s	ns	ns	ns	ns	ns	ns	ns	ns	ns	ns	ns	ns	ns	ns
ILMN_1672650	5315	PKM2	ns	s	ns	ns	ns	ns	ns	ns	ns	ns	ns	ns	ns	ns	ns	ns
ILMN_1672717	80195	C10orf57	ns	s	ns	ns	ns	ns	ns	ns	ns	ns	ns	ns	ns	ns	ns	ns
ILMN_1672795	400745	SH2D5	ns	s	ns	ns	ns	ns	ns	ns	ns	ns	ns	ns	ns	ns	ns	ns
ILMN_1672830	642082	LOC642082	ns	s	ns	ns	ns	ns	ns	ns	ns	ns	ns	ns	ns	ns	ns	ns
ILMN_1672843	26269	FBXO8	ns	s	ns	ns	ns	ns	ns	ns	ns	ns	ns	ns	ns	ns	ns	ns
ILMN_1672908	7291	TWIST1	ns	s	ns	ns	ns	ns	ns	ns	ns	ns	ns	ns	ns	ns	ns	ns
ILMN_1672947	831	CAST	ns	s	ns	ns	ns	ns	ns	ns	ns	ns	ns	ns	ns	ns	ns	ns
ILMN_1673023	57634	EP400	ns	s	ns	ns	ns	ns	ns	ns	ns	ns	ns	ns	ns	ns	ns	ns
ILMN_1673026	54927	CHCHD3	ns	s	ns	ns	ns	ns	ns	ns	ns	ns	ns	ns	ns	ns	ns	ns
ILMN_1673275	6399	TRAPPC2	ns	s	ns	ns	ns	ns	ns	ns	ns	ns	ns	ns	ns	ns	ns	ns
ILMN_1673421	440704	LOC440704	ns	s	ns	ns	ns	ns	ns	ns	ns	ns	ns	ns	ns	ns	ns	ns
ILMN_1673697	5936	RBM4	ns	s	ns	ns	ns	ns	ns	ns	ns	ns	ns	ns	ns	ns	ns	ns
ILMN_1673716	221458	KIF6	ns	s	ns	ns	ns	ns	ns	ns	ns	ns	ns	ns	ns	ns	ns	ns
ILMN_1673746	10431	TIMM23	ns	s	ns	ns	ns	ns	ns	ns	ns	ns	ns	ns	ns	ns	ns	ns
ILMN_1673752	56063	C1orf91	ns	s	ns	ns	ns	ns	ns	ns	ns	ns	ns	ns	ns	ns	ns	ns
ILMN_1673820	6596	HLTF	ns	s	ns	ns	ns	ns	ns	ns	ns	ns	ns	ns	ns	ns	ns	ns
ILMN_1673944	63905	MANBAL	ns	s	ns	ns	ns	ns	ns	ns	ns	ns	ns	ns	ns	ns	ns	ns
ILMN_1673962	23165	NUP205	ns	s	ns	ns	ns	ns	ns	ns	ns	ns	ns	ns	ns	ns	ns	ns
ILMN_1674024	64376	IKZF5	ns	s	ns	ns	ns	ns	ns	ns	ns	ns	ns	ns	ns	ns	ns	ns
ILMN_1674050	1296	COL8A2	ns	s	ns	ns	ns	ns	ns	ns	ns	ns	ns	ns	ns	ns	ns	ns
ILMN_1674135	9649	RALGPS1	ns	s	ns	ns	ns	ns	ns	ns	ns	ns	ns	ns	ns	ns	ns	ns
ILMN_1674334	653354	LOC653354	ns	s	ns	ns	ns	ns	ns	ns	ns	ns	ns	ns	ns	ns	ns	ns
ILMN_1674506	9439	MED23	ns	s	ns	ns	ns	ns	ns	ns	ns	ns	ns	ns	ns	ns	ns	ns
ILMN_1674522	25994	HIGD1A	ns	s	ns	ns	ns	ns	ns	ns	ns	ns	ns	ns	ns	ns	ns	ns
ILMN_1674560	57704	GBA2	ns	s	ns	ns	ns	ns	ns	ns	ns	ns	ns	ns	ns	ns	ns	ns
ILMN_1674590	652578	LOC652578	ns	s	ns	ns	ns	ns	ns	ns	ns	ns	ns	ns	ns	ns	ns	ns
ILMN_1674633	7328	UBE2H	ns	s	ns	ns	ns	ns	ns	ns	ns	ns	ns	ns	ns	ns	ns	ns
ILMN_1674661	1153	CIRBP	ns	s	ns	ns	ns	ns	ns	ns	ns	ns	ns	ns	ns	ns	ns	ns
ILMN_1674780	23451	SF3B1	ns	s	ns	ns	ns	ns	ns	ns	ns	ns	ns	ns	ns	ns	ns	ns
ILMN_1674866	10474	TADA3L	ns	s	ns	ns	ns	ns	ns	ns	ns	ns	ns	ns	ns	ns	ns	ns
ILMN_1674926	374872	C19orf35	ns	s	ns	ns	ns	ns	ns	ns	ns	ns	ns	ns	ns	ns	ns	ns
ILMN_1675055	79594	C1orf166	ns	s	ns	ns	ns	ns	ns	ns	ns	ns	ns	ns	ns	ns	ns	ns
ILMN_1675150	284459	HKR1	ns	s	ns	ns	ns	ns	ns	ns	ns	ns	ns	ns	ns	ns	ns	ns
ILMN_1675387	3987	LIMS1	ns	s	ns	ns	ns	ns	ns	ns	ns	ns	ns	ns	ns	ns	ns	ns
ILMN_1675542	729148	LOC729148	ns	s	ns	ns	ns	ns	ns	ns	ns	ns	ns	ns	ns	ns	ns	ns
ILMN_1675609	6606	SMN1	ns	s	ns	ns	ns	ns	ns	ns	ns	ns	ns	ns	ns	ns	ns	ns
ILMN_1675617	56953	NT5M	ns	s	ns	ns	ns	ns	ns	ns	ns	ns	ns	ns	ns	ns	ns	ns
ILMN_1675626	84950	PRPF38A	ns	s	ns	ns	ns	ns	ns	ns	ns	ns	ns	ns	ns	ns	ns	ns
ILMN_1675671	23308	ICOSLG	ns	s	ns	ns	ns	ns	ns	ns	ns	ns	ns	ns	ns	ns	ns	ns
ILMN_1675695	23047	PDS5B	ns	s	ns	ns	ns	ns	ns	ns	ns	ns	ns	ns	ns	ns	ns	ns
ILMN_1675756	3772	KCNJ15	ns	s	ns	ns	ns	ns	ns	ns	ns	ns	ns	ns	ns	ns	ns	ns
ILMN_1675803	NA	LOC285550	ns	s	ns	ns	ns	ns	ns	ns	ns	ns	ns	ns	ns	ns	ns	ns
ILMN_1676005	3836	KPNA1	ns	s	ns	ns	ns	ns	ns	ns	ns	ns	ns	ns	ns	ns	ns	ns
ILMN_1676128	1788	DNMT3A	ns	s	ns	ns	ns	ns	ns	ns	ns	ns	ns	ns	ns	ns	ns	ns
ILMN_1676233	92105	INTS4	ns	s	ns	ns	ns	ns	ns	ns	ns	ns	ns	ns	ns	ns	ns	ns
ILMN_1676241	54880	BCOR	ns	s	ns	ns	ns	ns	ns	ns	ns	ns	ns	ns	ns	ns	ns	ns
ILMN_1676265	3953	LEPR	ns	s	ns	ns	ns	ns	ns	ns	ns	ns	ns	ns	ns	ns	ns	ns
ILMN_1676278	1244	ABCC2	ns	s	ns	ns	ns	ns	ns	ns	ns	ns	ns	ns	ns	ns	ns	ns
ILMN_1676280	63899	NSUN3	ns	s	ns	ns	ns	ns	ns	ns	ns	ns	ns	ns	ns	ns	ns	ns
ILMN_1676296	8611	PPAP2A	ns	s	ns	ns	ns	ns	ns	ns	ns	ns	ns	ns	ns	ns	ns	ns
ILMN_1676302	64773	FAM113A	ns	s	ns	ns	ns	ns	ns	ns	ns	ns	ns	ns	ns	ns	ns	ns
ILMN_1676318	11176	BAZ2A	ns	s	ns	ns	ns	ns	ns	ns	ns	ns	ns	ns	ns	ns	ns	ns
ILMN_1676407	646100	LOC646100	ns	s	ns	ns	ns	ns	ns	ns	ns	ns	ns	ns	ns	ns	ns	ns
ILMN_1676408	117289	TAGAP	ns	s	ns	ns	ns	ns	ns	ns	ns	ns	ns	ns	ns	ns	ns	ns
ILMN_1676600	9632	SEC24C	ns	s	ns	ns	ns	ns	ns	ns	ns	ns	ns	ns	ns	ns	ns	ns
ILMN_1676629	51141	INSIG2	ns	s	ns	ns	ns	ns	ns	ns	ns	ns	ns	ns	ns	ns	ns	ns
ILMN_1676632	27185	DISC1	ns	s	ns	ns	ns	ns	ns	ns	ns	ns	ns	ns	ns	ns	ns	ns
ILMN_1676719	644330	LOC644330	ns	s	ns	ns	ns	ns	ns	ns	ns	ns	ns	ns	ns	ns	ns	ns
ILMN_1676745	7701	ZNF142	ns	s	ns	ns	ns	ns	ns	ns	ns	ns	ns	ns	ns	ns	ns	ns
ILMN_1676780	55423	SIRPG	ns	s	ns	ns	ns	ns	ns	ns	ns	ns	ns	ns	ns	ns	ns	ns
ILMN_1676799	4236	MFAP1	ns	s	ns	ns	ns	ns	ns	ns	ns	ns	ns	ns	ns	ns	ns	ns
ILMN_1676955	7297	TYK2	ns	s	ns	ns	ns	ns	ns	ns	ns	ns	ns	ns	ns	ns	ns	ns
ILMN_1676984	1649	DDIT3	ns	s	ns	ns	ns	ns	ns	ns	ns	ns	ns	ns	ns	ns	ns	ns
ILMN_1652434	441024	MTHFD2L	s	ns	ns	ns	ns	ns	ns	ns	ns	ns	ns	ns	ns	ns	ns	ns
ILMN_1652768	440589	LOC440589	s	ns	ns	ns	ns	ns	ns	ns	ns	ns	ns	ns	ns	ns	ns	ns
ILMN_1653134	255919	TMEM188	s	ns	ns	ns	ns	ns	ns	ns	ns	ns	ns	ns	ns	ns	ns	ns
ILMN_1653266	79982	DNAJB14	s	ns	ns	ns	ns	ns	ns	ns	ns	ns	ns	ns	ns	ns	ns	ns
ILMN_1653342	64118	DUS1L	s	ns	ns	ns	ns	ns	ns	ns	ns	ns	ns	ns	ns	ns	ns	ns
ILMN_1653432	NA	HNRPDL	s	ns	ns	ns	ns	ns	ns	ns	ns	ns	ns	ns	ns	ns	ns	ns
ILMN_1653498	10261	IGSF6	s	ns	ns	ns	ns	ns	ns	ns	ns	ns	ns	ns	ns	ns	ns	ns
ILMN_1653529	54881	TEX10	s	ns	ns	ns	ns	ns	ns	ns	ns	ns	ns	ns	ns	ns	ns	ns
ILMN_1653579	401845	LOC401845	s	ns	ns	ns	ns	ns	ns	ns	ns	ns	ns	ns	ns	ns	ns	ns
ILMN_1653652	5788	PTPRC	s	ns	ns	ns	ns	ns	ns	ns	ns	ns	ns	ns	ns	ns	ns	ns
ILMN_1653712	91373	UAP1L1	s	ns	ns	ns	ns	ns	ns	ns	ns	ns	ns	ns	ns	ns	ns	ns
ILMN_1653728	2066	ERBB4	s	ns	ns	ns	ns	ns	ns	ns	ns	ns	ns	ns	ns	ns	ns	ns
ILMN_1653793	5170	PDPK1	s	ns	ns	ns	ns	ns	ns	ns	ns	ns	ns	ns	ns	ns	ns	ns
ILMN_1653828	55743	CHFR	s	ns	ns	ns	ns	ns	ns	ns	ns	ns	ns	ns	ns	ns	ns	ns
ILMN_1654099	9860	LRIG2	s	ns	ns	ns	ns	ns	ns	ns	ns	ns	ns	ns	ns	ns	ns	ns
ILMN_1654118	598	BCL2L1	s	ns	ns	ns	ns	ns	ns	ns	ns	ns	ns	ns	ns	ns	ns	ns
ILMN_1654141	253832	ZDHHC20	s	ns	ns	ns	ns	ns	ns	ns	ns	ns	ns	ns	ns	ns	ns	ns
ILMN_1654151	1345	COX6C	s	ns	ns	ns	ns	ns	ns	ns	ns	ns	ns	ns	ns	ns	ns	ns
ILMN_1654289	2002	ELK1	s	ns	ns	ns	ns	ns	ns	ns	ns	ns	ns	ns	ns	ns	ns	ns
ILMN_1654318	25930	PTPN23	s	ns	ns	ns	ns	ns	ns	ns	ns	ns	ns	ns	ns	ns	ns	ns
ILMN_1654319	145864	HAPLN3	s	ns	ns	ns	ns	ns	ns	ns	ns	ns	ns	ns	ns	ns	ns	ns
ILMN_1654396	3689	ITGB2	s	ns	ns	ns	ns	ns	ns	ns	ns	ns	ns	ns	ns	ns	ns	ns
ILMN_1654518	4034	LRCH4	s	ns	ns	ns	ns	ns	ns	ns	ns	ns	ns	ns	ns	ns	ns	ns
ILMN_1654543	10001	MED6	s	ns	ns	ns	ns	ns	ns	ns	ns	ns	ns	ns	ns	ns	ns	ns
ILMN_1654545	29894	CPSF1	s	ns	ns	ns	ns	ns	ns	ns	ns	ns	ns	ns	ns	ns	ns	ns
ILMN_1654552	10240	MRPS31	s	ns	ns	ns	ns	ns	ns	ns	ns	ns	ns	ns	ns	ns	ns	ns
ILMN_1654586	22821	RASA3	s	ns	ns	ns	ns	ns	ns	ns	ns	ns	ns	ns	ns	ns	ns	ns
ILMN_1654630	54540	FLJ10404	s	ns	ns	ns	ns	ns	ns	ns	ns	ns	ns	ns	ns	ns	ns	ns
ILMN_1654691	2287	FKBP3	s	ns	ns	ns	ns	ns	ns	ns	ns	ns	ns	ns	ns	ns	ns	ns
ILMN_1654692	55103	RALGPS2	s	ns	ns	ns	ns	ns	ns	ns	ns	ns	ns	ns	ns	ns	ns	ns
ILMN_1654737	22954	TRIM32	s	ns	ns	ns	ns	ns	ns	ns	ns	ns	ns	ns	ns	ns	ns	ns
ILMN_1654819	51385	ZNF589	s	ns	ns	ns	ns	ns	ns	ns	ns	ns	ns	ns	ns	ns	ns	ns
ILMN_1654890	114823	LENG8	s	ns	ns	ns	ns	ns	ns	ns	ns	ns	ns	ns	ns	ns	ns	ns
ILMN_1654915	646786	LOC646786	s	ns	ns	ns	ns	ns	ns	ns	ns	ns	ns	ns	ns	ns	ns	ns
ILMN_1654946	65982	ZSCAN18	s	ns	ns	ns	ns	ns	ns	ns	ns	ns	ns	ns	ns	ns	ns	ns
ILMN_1655011	728492	SERF1B	s	ns	ns	ns	ns	ns	ns	ns	ns	ns	ns	ns	ns	ns	ns	ns
ILMN_1655046	10204	NUTF2	s	ns	ns	ns	ns	ns	ns	ns	ns	ns	ns	ns	ns	ns	ns	ns
ILMN_1655117	57728	WDR19	s	ns	ns	ns	ns	ns	ns	ns	ns	ns	ns	ns	ns	ns	ns	ns
ILMN_1655177	5297	PIK4CA	s	ns	ns	ns	ns	ns	ns	ns	ns	ns	ns	ns	ns	ns	ns	ns
ILMN_1655194	79960	PHF17	s	ns	ns	ns	ns	ns	ns	ns	ns	ns	ns	ns	ns	ns	ns	ns
ILMN_1655206	403341	ZBTB34	s	ns	ns	ns	ns	ns	ns	ns	ns	ns	ns	ns	ns	ns	ns	ns
ILMN_1655225	148223	C19orf25	s	ns	ns	ns	ns	ns	ns	ns	ns	ns	ns	ns	ns	ns	ns	ns
ILMN_1655244	642755	LOC642755	s	ns	ns	ns	ns	ns	ns	ns	ns	ns	ns	ns	ns	ns	ns	ns
ILMN_1655261	121506	ERP27	s	ns	ns	ns	ns	ns	ns	ns	ns	ns	ns	ns	ns	ns	ns	ns
ILMN_1655316	5706	PSMC6	s	ns	ns	ns	ns	ns	ns	ns	ns	ns	ns	ns	ns	ns	ns	ns
ILMN_1655340	51255	RNF181	s	ns	ns	ns	ns	ns	ns	ns	ns	ns	ns	ns	ns	ns	ns	ns
ILMN_1655414	8740	TNFSF14	s	ns	ns	ns	ns	ns	ns	ns	ns	ns	ns	ns	ns	ns	ns	ns
ILMN_1655444	728492	LOC728492	s	ns	ns	ns	ns	ns	ns	ns	ns	ns	ns	ns	ns	ns	ns	ns
ILMN_1655497	1975	EIF4B	s	ns	ns	ns	ns	ns	ns	ns	ns	ns	ns	ns	ns	ns	ns	ns
ILMN_1655525	201163	FLCN	s	ns	ns	ns	ns	ns	ns	ns	ns	ns	ns	ns	ns	ns	ns	ns
ILMN_1655549	89790	SIGLEC10	s	ns	ns	ns	ns	ns	ns	ns	ns	ns	ns	ns	ns	ns	ns	ns
ILMN_1655612	27106	ARRDC2	s	ns	ns	ns	ns	ns	ns	ns	ns	ns	ns	ns	ns	ns	ns	ns
ILMN_1655635	56339	METTL3	s	ns	ns	ns	ns	ns	ns	ns	ns	ns	ns	ns	ns	ns	ns	ns
ILMN_1655645	204	AK2	s	ns	ns	ns	ns	ns	ns	ns	ns	ns	ns	ns	ns	ns	ns	ns
ILMN_1655684	54938	SARS2	s	ns	ns	ns	ns	ns	ns	ns	ns	ns	ns	ns	ns	ns	ns	ns
ILMN_1655694	642031	LOC642031	s	ns	ns	ns	ns	ns	ns	ns	ns	ns	ns	ns	ns	ns	ns	ns
ILMN_1655702	51099	ABHD5	s	ns	ns	ns	ns	ns	ns	ns	ns	ns	ns	ns	ns	ns	ns	ns
ILMN_1655754	402066	LOC402066	s	ns	ns	ns	ns	ns	ns	ns	ns	ns	ns	ns	ns	ns	ns	ns
ILMN_1655821	822	CAPG	s	ns	ns	ns	ns	ns	ns	ns	ns	ns	ns	ns	ns	ns	ns	ns
ILMN_1655868	23520	ANP32C	s	ns	ns	ns	ns	ns	ns	ns	ns	ns	ns	ns	ns	ns	ns	ns
ILMN_1655871	647384	LOC647384	s	ns	ns	ns	ns	ns	ns	ns	ns	ns	ns	ns	ns	ns	ns	ns
ILMN_1655884	488	ATP2A2	s	ns	ns	ns	ns	ns	ns	ns	ns	ns	ns	ns	ns	ns	ns	ns
ILMN_1655913	4925	NUCB2	s	ns	ns	ns	ns	ns	ns	ns	ns	ns	ns	ns	ns	ns	ns	ns
ILMN_1655922	9701	SAPS2	s	ns	ns	ns	ns	ns	ns	ns	ns	ns	ns	ns	ns	ns	ns	ns
ILMN_1655935	113	ADCY7	s	ns	ns	ns	ns	ns	ns	ns	ns	ns	ns	ns	ns	ns	ns	ns
ILMN_1655987	23166	STAB1	s	ns	ns	ns	ns	ns	ns	ns	ns	ns	ns	ns	ns	ns	ns	ns
ILMN_1655990	55755	CDK5RAP2	s	ns	ns	ns	ns	ns	ns	ns	ns	ns	ns	ns	ns	ns	ns	ns
ILMN_1656011	5996	RGS1	s	ns	ns	ns	ns	ns	ns	ns	ns	ns	ns	ns	ns	ns	ns	ns
ILMN_1656045	60677	BRUNOL6	s	ns	ns	ns	ns	ns	ns	ns	ns	ns	ns	ns	ns	ns	ns	ns
ILMN_1656066	30000	TNPO2	s	ns	ns	ns	ns	ns	ns	ns	ns	ns	ns	ns	ns	ns	ns	ns
ILMN_1656079	3784	KCNQ1	s	ns	ns	ns	ns	ns	ns	ns	ns	ns	ns	ns	ns	ns	ns	ns
ILMN_1656082	3020	H3F3A	s	ns	ns	ns	ns	ns	ns	ns	ns	ns	ns	ns	ns	ns	ns	ns
ILMN_1656145	2805	GOT1	s	ns	ns	ns	ns	ns	ns	ns	ns	ns	ns	ns	ns	ns	ns	ns
ILMN_1656165	8239	USP9X	s	ns	ns	ns	ns	ns	ns	ns	ns	ns	ns	ns	ns	ns	ns	ns
ILMN_1656171	171019	ADAMTS19	s	ns	ns	ns	ns	ns	ns	ns	ns	ns	ns	ns	ns	ns	ns	ns
ILMN_1656185	54849	DEF8	s	ns	ns	ns	ns	ns	ns	ns	ns	ns	ns	ns	ns	ns	ns	ns
ILMN_1656285	25840	METTL7A	s	ns	ns	ns	ns	ns	ns	ns	ns	ns	ns	ns	ns	ns	ns	ns
ILMN_1656287	9806	SPOCK2	s	ns	ns	ns	ns	ns	ns	ns	ns	ns	ns	ns	ns	ns	ns	ns
ILMN_1656310	3620	INDO	s	ns	ns	ns	ns	ns	ns	ns	ns	ns	ns	ns	ns	ns	ns	ns
ILMN_1656316	9203	ZMYM3	s	ns	ns	ns	ns	ns	ns	ns	ns	ns	ns	ns	ns	ns	ns	ns
ILMN_1656386	9871	SEC24D	s	ns	ns	ns	ns	ns	ns	ns	ns	ns	ns	ns	ns	ns	ns	ns
ILMN_1656393	5523	PPP2R3A	s	ns	ns	ns	ns	ns	ns	ns	ns	ns	ns	ns	ns	ns	ns	ns
ILMN_1656399	90843	TCEAL8	s	ns	ns	ns	ns	ns	ns	ns	ns	ns	ns	ns	ns	ns	ns	ns
ILMN_1656463	51501	C11orf73	s	ns	ns	ns	ns	ns	ns	ns	ns	ns	ns	ns	ns	ns	ns	ns
ILMN_1656537	6638	SNRPN	s	ns	ns	ns	ns	ns	ns	ns	ns	ns	ns	ns	ns	ns	ns	ns
ILMN_1656621	27243	CHMP2A	s	ns	ns	ns	ns	ns	ns	ns	ns	ns	ns	ns	ns	ns	ns	ns
ILMN_1656676	79699	ZYG11B	s	ns	ns	ns	ns	ns	ns	ns	ns	ns	ns	ns	ns	ns	ns	ns
ILMN_1656792	84256	FLYWCH1	s	ns	ns	ns	ns	ns	ns	ns	ns	ns	ns	ns	ns	ns	ns	ns
ILMN_1656807	6155	RPL27	s	ns	ns	ns	ns	ns	ns	ns	ns	ns	ns	ns	ns	ns	ns	ns
ILMN_1656869	284194	LOC284194	s	ns	ns	ns	ns	ns	ns	ns	ns	ns	ns	ns	ns	ns	ns	ns
ILMN_1656900	6817	SULT1A1	s	ns	ns	ns	ns	ns	ns	ns	ns	ns	ns	ns	ns	ns	ns	ns
ILMN_1656949	651723	LOC651723	s	ns	ns	ns	ns	ns	ns	ns	ns	ns	ns	ns	ns	ns	ns	ns
ILMN_1657011	286208	LOC286208	s	ns	ns	ns	ns	ns	ns	ns	ns	ns	ns	ns	ns	ns	ns	ns
ILMN_1657050	153642	ARSK	s	ns	ns	ns	ns	ns	ns	ns	ns	ns	ns	ns	ns	ns	ns	ns
ILMN_1657095	10948	STARD3	s	ns	ns	ns	ns	ns	ns	ns	ns	ns	ns	ns	ns	ns	ns	ns
ILMN_1657139	23536	ADAT1	s	ns	ns	ns	ns	ns	ns	ns	ns	ns	ns	ns	ns	ns	ns	ns
ILMN_1657348	650909	LOC650909	s	ns	ns	ns	ns	ns	ns	ns	ns	ns	ns	ns	ns	ns	ns	ns
ILMN_1657405	121665	SPPL3	s	ns	ns	ns	ns	ns	ns	ns	ns	ns	ns	ns	ns	ns	ns	ns
ILMN_1657423	51324	SPG21	s	ns	ns	ns	ns	ns	ns	ns	ns	ns	ns	ns	ns	ns	ns	ns
ILMN_1657436	26127	FGFR1OP2	s	ns	ns	ns	ns	ns	ns	ns	ns	ns	ns	ns	ns	ns	ns	ns
ILMN_1657446	84284	C1orf57	s	ns	ns	ns	ns	ns	ns	ns	ns	ns	ns	ns	ns	ns	ns	ns
ILMN_1657478	54551	MAGEL2	s	ns	ns	ns	ns	ns	ns	ns	ns	ns	ns	ns	ns	ns	ns	ns
ILMN_1657483	10483	SEC23B	s	ns	ns	ns	ns	ns	ns	ns	ns	ns	ns	ns	ns	ns	ns	ns
ILMN_1657495	9761	KIAA0152	s	ns	ns	ns	ns	ns	ns	ns	ns	ns	ns	ns	ns	ns	ns	ns
ILMN_1657497	9856	KIAA0319	s	ns	ns	ns	ns	ns	ns	ns	ns	ns	ns	ns	ns	ns	ns	ns
ILMN_1657591	6328	SCN3A	s	ns	ns	ns	ns	ns	ns	ns	ns	ns	ns	ns	ns	ns	ns	ns
ILMN_1657612	285900	LOC285900	s	ns	ns	ns	ns	ns	ns	ns	ns	ns	ns	ns	ns	ns	ns	ns
ILMN_1657697	56681	SAR1A	s	ns	ns	ns	ns	ns	ns	ns	ns	ns	ns	ns	ns	ns	ns	ns
ILMN_1657708	11343	MGLL	s	ns	ns	ns	ns	ns	ns	ns	ns	ns	ns	ns	ns	ns	ns	ns
ILMN_1657722	6189	RPS3A	s	ns	ns	ns	ns	ns	ns	ns	ns	ns	ns	ns	ns	ns	ns	ns
ILMN_1657744	57184	C15orf17	s	ns	ns	ns	ns	ns	ns	ns	ns	ns	ns	ns	ns	ns	ns	ns
ILMN_1657746	670	BPHL	s	ns	ns	ns	ns	ns	ns	ns	ns	ns	ns	ns	ns	ns	ns	ns
ILMN_1657868	23409	SIRT4	s	ns	ns	ns	ns	ns	ns	ns	ns	ns	ns	ns	ns	ns	ns	ns
ILMN_1657884	4831	NME2	s	ns	ns	ns	ns	ns	ns	ns	ns	ns	ns	ns	ns	ns	ns	ns
ILMN_1657892	51311	TLR8	s	ns	ns	ns	ns	ns	ns	ns	ns	ns	ns	ns	ns	ns	ns	ns
ILMN_1657913	149469	C1orf84	s	ns	ns	ns	ns	ns	ns	ns	ns	ns	ns	ns	ns	ns	ns	ns
ILMN_1657932	4588	MUC6	s	ns	ns	ns	ns	ns	ns	ns	ns	ns	ns	ns	ns	ns	ns	ns
ILMN_1657983	54386	TERF2IP	s	ns	ns	ns	ns	ns	ns	ns	ns	ns	ns	ns	ns	ns	ns	ns
ILMN_1658093	652470	LOC652470	s	ns	ns	ns	ns	ns	ns	ns	ns	ns	ns	ns	ns	ns	ns	ns
ILMN_1658094	22891	ZNF365	s	ns	ns	ns	ns	ns	ns	ns	ns	ns	ns	ns	ns	ns	ns	ns
ILMN_1658121	5199	CFP	s	ns	ns	ns	ns	ns	ns	ns	ns	ns	ns	ns	ns	ns	ns	ns
ILMN_1658144	9321	TRIP11	s	ns	ns	ns	ns	ns	ns	ns	ns	ns	ns	ns	ns	ns	ns	ns
ILMN_1658160	29057	FAM156A	s	ns	ns	ns	ns	ns	ns	ns	ns	ns	ns	ns	ns	ns	ns	ns
ILMN_1658182	51320	MEX3C	s	ns	ns	ns	ns	ns	ns	ns	ns	ns	ns	ns	ns	ns	ns	ns
ILMN_1658259	4733	DRG1	s	ns	ns	ns	ns	ns	ns	ns	ns	ns	ns	ns	ns	ns	ns	ns
ILMN_1658289	84058	WDR54	s	ns	ns	ns	ns	ns	ns	ns	ns	ns	ns	ns	ns	ns	ns	ns
ILMN_1658290	79091	C16orf68	s	ns	ns	ns	ns	ns	ns	ns	ns	ns	ns	ns	ns	ns	ns	ns
ILMN_1658302	9063	PIAS2	s	ns	ns	ns	ns	ns	ns	ns	ns	ns	ns	ns	ns	ns	ns	ns
ILMN_1658327	11177	BAZ1A	s	ns	ns	ns	ns	ns	ns	ns	ns	ns	ns	ns	ns	ns	ns	ns
ILMN_1658373	9924	PAN2	s	ns	ns	ns	ns	ns	ns	ns	ns	ns	ns	ns	ns	ns	ns	ns
ILMN_1658411	1108	CHD4	s	ns	ns	ns	ns	ns	ns	ns	ns	ns	ns	ns	ns	ns	ns	ns
ILMN_1658416	51023	MRPS18C	s	ns	ns	ns	ns	ns	ns	ns	ns	ns	ns	ns	ns	ns	ns	ns
ILMN_1658420	1826	DSCAM	s	ns	ns	ns	ns	ns	ns	ns	ns	ns	ns	ns	ns	ns	ns	ns
ILMN_1658437	119559	SFXN4	s	ns	ns	ns	ns	ns	ns	ns	ns	ns	ns	ns	ns	ns	ns	ns
ILMN_1658464	2971	GTF3A	s	ns	ns	ns	ns	ns	ns	ns	ns	ns	ns	ns	ns	ns	ns	ns
ILMN_1658504	1119	CHKA	s	ns	ns	ns	ns	ns	ns	ns	ns	ns	ns	ns	ns	ns	ns	ns
ILMN_1658579	80279	CDK5RAP3	s	ns	ns	ns	ns	ns	ns	ns	ns	ns	ns	ns	ns	ns	ns	ns
ILMN_1658599	647243	LOC647243	s	ns	ns	ns	ns	ns	ns	ns	ns	ns	ns	ns	ns	ns	ns	ns
ILMN_1658607	NA	DLEU2	s	ns	ns	ns	ns	ns	ns	ns	ns	ns	ns	ns	ns	ns	ns	ns
ILMN_1658636	4361	MRE11A	s	ns	ns	ns	ns	ns	ns	ns	ns	ns	ns	ns	ns	ns	ns	ns
ILMN_1658677	196403	DTX3	s	ns	ns	ns	ns	ns	ns	ns	ns	ns	ns	ns	ns	ns	ns	ns
ILMN_1658702	8970	HIST1H2BJ	s	ns	ns	ns	ns	ns	ns	ns	ns	ns	ns	ns	ns	ns	ns	ns
ILMN_1658743	23582	CCNDBP1	s	ns	ns	ns	ns	ns	ns	ns	ns	ns	ns	ns	ns	ns	ns	ns
ILMN_1658746	51495	PTPLAD1	s	ns	ns	ns	ns	ns	ns	ns	ns	ns	ns	ns	ns	ns	ns	ns
ILMN_1658759	5824	PEX19	s	ns	ns	ns	ns	ns	ns	ns	ns	ns	ns	ns	ns	ns	ns	ns
ILMN_1658798	1955	MEGF9	s	ns	ns	ns	ns	ns	ns	ns	ns	ns	ns	ns	ns	ns	ns	ns
ILMN_1658861	85002	FAM86B1	s	ns	ns	ns	ns	ns	ns	ns	ns	ns	ns	ns	ns	ns	ns	ns
ILMN_1658902	10522	DEAF1	s	ns	ns	ns	ns	ns	ns	ns	ns	ns	ns	ns	ns	ns	ns	ns
ILMN_1658951	5524	PPP2R4	s	ns	ns	ns	ns	ns	ns	ns	ns	ns	ns	ns	ns	ns	ns	ns
ILMN_1658957	653635	LOC653635	s	ns	ns	ns	ns	ns	ns	ns	ns	ns	ns	ns	ns	ns	ns	ns
ILMN_1658962	3937	LCP2	s	ns	ns	ns	ns	ns	ns	ns	ns	ns	ns	ns	ns	ns	ns	ns
ILMN_1658992	8813	DPM1	s	ns	ns	ns	ns	ns	ns	ns	ns	ns	ns	ns	ns	ns	ns	ns
ILMN_1659024	9911	TMCC2	s	ns	ns	ns	ns	ns	ns	ns	ns	ns	ns	ns	ns	ns	ns	ns
ILMN_1659027	6513	SLC2A1	s	ns	ns	ns	ns	ns	ns	ns	ns	ns	ns	ns	ns	ns	ns	ns
ILMN_1659082	85437	ZCRB1	s	ns	ns	ns	ns	ns	ns	ns	ns	ns	ns	ns	ns	ns	ns	ns
ILMN_1659099	9475	ROCK2	s	ns	ns	ns	ns	ns	ns	ns	ns	ns	ns	ns	ns	ns	ns	ns
ILMN_1659110	NA	MGC40489	s	ns	ns	ns	ns	ns	ns	ns	ns	ns	ns	ns	ns	ns	ns	ns
ILMN_1659257	943	TNFRSF8	s	ns	ns	ns	ns	ns	ns	ns	ns	ns	ns	ns	ns	ns	ns	ns
ILMN_1659350	839	CASP6	s	ns	ns	ns	ns	ns	ns	ns	ns	ns	ns	ns	ns	ns	ns	ns
ILMN_1659364	5985	RFC5	s	ns	ns	ns	ns	ns	ns	ns	ns	ns	ns	ns	ns	ns	ns	ns
ILMN_1659405	653773	LOC653773	s	ns	ns	ns	ns	ns	ns	ns	ns	ns	ns	ns	ns	ns	ns	ns
ILMN_1659415	8649	MAP2K1IP1	s	ns	ns	ns	ns	ns	ns	ns	ns	ns	ns	ns	ns	ns	ns	ns
ILMN_1659470	55193	PBRM1	s	ns	ns	ns	ns	ns	ns	ns	ns	ns	ns	ns	ns	ns	ns	ns
ILMN_1659537	112950	MED8	s	ns	ns	ns	ns	ns	ns	ns	ns	ns	ns	ns	ns	ns	ns	ns
ILMN_1659583	644617	LOC644617	s	ns	ns	ns	ns	ns	ns	ns	ns	ns	ns	ns	ns	ns	ns	ns
ILMN_1659610	27134	TJP3	s	ns	ns	ns	ns	ns	ns	ns	ns	ns	ns	ns	ns	ns	ns	ns
ILMN_1659659	28986	MAGEH1	s	ns	ns	ns	ns	ns	ns	ns	ns	ns	ns	ns	ns	ns	ns	ns
ILMN_1659703	11060	WWP2	s	ns	ns	ns	ns	ns	ns	ns	ns	ns	ns	ns	ns	ns	ns	ns
ILMN_1659725	56915	EXOSC5	s	ns	ns	ns	ns	ns	ns	ns	ns	ns	ns	ns	ns	ns	ns	ns
ILMN_1659766	9531	BAG3	s	ns	ns	ns	ns	ns	ns	ns	ns	ns	ns	ns	ns	ns	ns	ns
ILMN_1659770	3772	KCNJ15	s	ns	ns	ns	ns	ns	ns	ns	ns	ns	ns	ns	ns	ns	ns	ns
ILMN_1659771	645683	LOC645683	s	ns	ns	ns	ns	ns	ns	ns	ns	ns	ns	ns	ns	ns	ns	ns
ILMN_1659782	8859	STK19	s	ns	ns	ns	ns	ns	ns	ns	ns	ns	ns	ns	ns	ns	ns	ns
ILMN_1659894	115286	SLC25A26	s	ns	ns	ns	ns	ns	ns	ns	ns	ns	ns	ns	ns	ns	ns	ns
ILMN_1659952	8898	MTMR2	s	ns	ns	ns	ns	ns	ns	ns	ns	ns	ns	ns	ns	ns	ns	ns
ILMN_1659975	127703	C1orf216	s	ns	ns	ns	ns	ns	ns	ns	ns	ns	ns	ns	ns	ns	ns	ns
ILMN_1659976	10978	CLP1	s	ns	ns	ns	ns	ns	ns	ns	ns	ns	ns	ns	ns	ns	ns	ns
ILMN_1660017	55615	PRR5	s	ns	ns	ns	ns	ns	ns	ns	ns	ns	ns	ns	ns	ns	ns	ns
ILMN_1660027	2213	FCGR2B	s	ns	ns	ns	ns	ns	ns	ns	ns	ns	ns	ns	ns	ns	ns	ns
ILMN_1660063	56655	POLE4	s	ns	ns	ns	ns	ns	ns	ns	ns	ns	ns	ns	ns	ns	ns	ns
ILMN_1660079	22838	RNF44	s	ns	ns	ns	ns	ns	ns	ns	ns	ns	ns	ns	ns	ns	ns	ns
ILMN_1660114	22915	MMRN1	s	ns	ns	ns	ns	ns	ns	ns	ns	ns	ns	ns	ns	ns	ns	ns
ILMN_1660144	6942	TCF20	s	ns	ns	ns	ns	ns	ns	ns	ns	ns	ns	ns	ns	ns	ns	ns
ILMN_1660227	646434	LOC646434	s	ns	ns	ns	ns	ns	ns	ns	ns	ns	ns	ns	ns	ns	ns	ns
ILMN_1660270	51622	C7orf28A	s	ns	ns	ns	ns	ns	ns	ns	ns	ns	ns	ns	ns	ns	ns	ns
ILMN_1660275	60526	C2orf43	s	ns	ns	ns	ns	ns	ns	ns	ns	ns	ns	ns	ns	ns	ns	ns
ILMN_1660292	54460	MRPS21	s	ns	ns	ns	ns	ns	ns	ns	ns	ns	ns	ns	ns	ns	ns	ns
ILMN_1660357	641825	LOC641825	s	ns	ns	ns	ns	ns	ns	ns	ns	ns	ns	ns	ns	ns	ns	ns
ILMN_1660359	654126	LOC654126	s	ns	ns	ns	ns	ns	ns	ns	ns	ns	ns	ns	ns	ns	ns	ns
ILMN_1660368	8295	TRRAP	s	ns	ns	ns	ns	ns	ns	ns	ns	ns	ns	ns	ns	ns	ns	ns
ILMN_1660376	387841	LOC387841	s	ns	ns	ns	ns	ns	ns	ns	ns	ns	ns	ns	ns	ns	ns	ns
ILMN_1660412	NA	MGC27345	s	ns	ns	ns	ns	ns	ns	ns	ns	ns	ns	ns	ns	ns	ns	ns
ILMN_1660440	51104	FAM108B1	s	ns	ns	ns	ns	ns	ns	ns	ns	ns	ns	ns	ns	ns	ns	ns
ILMN_1660462	255231	MCOLN2	s	ns	ns	ns	ns	ns	ns	ns	ns	ns	ns	ns	ns	ns	ns	ns
ILMN_1660568	401622	LOC401622	s	ns	ns	ns	ns	ns	ns	ns	ns	ns	ns	ns	ns	ns	ns	ns
ILMN_1660577	517	ATP5G2	s	ns	ns	ns	ns	ns	ns	ns	ns	ns	ns	ns	ns	ns	ns	ns
ILMN_1660624	3985	LIMK2	s	ns	ns	ns	ns	ns	ns	ns	ns	ns	ns	ns	ns	ns	ns	ns
ILMN_1660749	79058	ASPSCR1	s	ns	ns	ns	ns	ns	ns	ns	ns	ns	ns	ns	ns	ns	ns	ns
ILMN_1660754	407975	C13orf25	s	ns	ns	ns	ns	ns	ns	ns	ns	ns	ns	ns	ns	ns	ns	ns
ILMN_1660832	285053	LOC285053	s	ns	ns	ns	ns	ns	ns	ns	ns	ns	ns	ns	ns	ns	ns	ns
ILMN_1660858	9610	RIN1	s	ns	ns	ns	ns	ns	ns	ns	ns	ns	ns	ns	ns	ns	ns	ns
ILMN_1660869	NA	LOC643438	s	ns	ns	ns	ns	ns	ns	ns	ns	ns	ns	ns	ns	ns	ns	ns
ILMN_1660880	6050	RNH1	s	ns	ns	ns	ns	ns	ns	ns	ns	ns	ns	ns	ns	ns	ns	ns
ILMN_1660938	114034	TOE1	s	ns	ns	ns	ns	ns	ns	ns	ns	ns	ns	ns	ns	ns	ns	ns
ILMN_1660976	653204	LOC653204	s	ns	ns	ns	ns	ns	ns	ns	ns	ns	ns	ns	ns	ns	ns	ns
ILMN_1661138	54856	GON4L	s	ns	ns	ns	ns	ns	ns	ns	ns	ns	ns	ns	ns	ns	ns	ns
ILMN_1661142	7110	TMF1	s	ns	ns	ns	ns	ns	ns	ns	ns	ns	ns	ns	ns	ns	ns	ns
ILMN_1661170	4714	NDUFB8	s	ns	ns	ns	ns	ns	ns	ns	ns	ns	ns	ns	ns	ns	ns	ns
ILMN_1661196	1438	CSF2RA	s	ns	ns	ns	ns	ns	ns	ns	ns	ns	ns	ns	ns	ns	ns	ns
ILMN_1661306	643433	LOC643433	s	ns	ns	ns	ns	ns	ns	ns	ns	ns	ns	ns	ns	ns	ns	ns
ILMN_1661335	6711	SPTBN1	s	ns	ns	ns	ns	ns	ns	ns	ns	ns	ns	ns	ns	ns	ns	ns
ILMN_1661337	6723	SRM	s	ns	ns	ns	ns	ns	ns	ns	ns	ns	ns	ns	ns	ns	ns	ns
ILMN_1661343	8740	TNFSF14	s	ns	ns	ns	ns	ns	ns	ns	ns	ns	ns	ns	ns	ns	ns	ns
ILMN_1661346	648210	LOC648210	s	ns	ns	ns	ns	ns	ns	ns	ns	ns	ns	ns	ns	ns	ns	ns
ILMN_1661389	392713	LOC392713	s	ns	ns	ns	ns	ns	ns	ns	ns	ns	ns	ns	ns	ns	ns	ns
ILMN_1661409	23272	C3orf63	s	ns	ns	ns	ns	ns	ns	ns	ns	ns	ns	ns	ns	ns	ns	ns
ILMN_1661416	400958	LOC400958	s	ns	ns	ns	ns	ns	ns	ns	ns	ns	ns	ns	ns	ns	ns	ns
ILMN_1661427	5986	RFNG	s	ns	ns	ns	ns	ns	ns	ns	ns	ns	ns	ns	ns	ns	ns	ns
ILMN_1661432	348995	NUP43	s	ns	ns	ns	ns	ns	ns	ns	ns	ns	ns	ns	ns	ns	ns	ns
ILMN_1661440	84841	MGC15634	s	ns	ns	ns	ns	ns	ns	ns	ns	ns	ns	ns	ns	ns	ns	ns
ILMN_1661490	10471	PFDN6	s	ns	ns	ns	ns	ns	ns	ns	ns	ns	ns	ns	ns	ns	ns	ns
ILMN_1661500	8702	B4GALT4	s	ns	ns	ns	ns	ns	ns	ns	ns	ns	ns	ns	ns	ns	ns	ns
ILMN_1661516	548644	POLR2J3	s	ns	ns	ns	ns	ns	ns	ns	ns	ns	ns	ns	ns	ns	ns	ns
ILMN_1661519	9729	KIAA0408	s	ns	ns	ns	ns	ns	ns	ns	ns	ns	ns	ns	ns	ns	ns	ns
ILMN_1661577	389692	MAFA	s	ns	ns	ns	ns	ns	ns	ns	ns	ns	ns	ns	ns	ns	ns	ns
ILMN_1661596	28982	FLVCR1	s	ns	ns	ns	ns	ns	ns	ns	ns	ns	ns	ns	ns	ns	ns	ns
ILMN_1661622	51256	TBC1D7	s	ns	ns	ns	ns	ns	ns	ns	ns	ns	ns	ns	ns	ns	ns	ns
ILMN_1661636	7750	ZMYM2	s	ns	ns	ns	ns	ns	ns	ns	ns	ns	ns	ns	ns	ns	ns	ns
ILMN_1661646	55024	BANK1	s	ns	ns	ns	ns	ns	ns	ns	ns	ns	ns	ns	ns	ns	ns	ns
ILMN_1661653	55070	DET1	s	ns	ns	ns	ns	ns	ns	ns	ns	ns	ns	ns	ns	ns	ns	ns
ILMN_1661695	11213	IRAK3	s	ns	ns	ns	ns	ns	ns	ns	ns	ns	ns	ns	ns	ns	ns	ns
ILMN_1661776	55835	CENPJ	s	ns	ns	ns	ns	ns	ns	ns	ns	ns	ns	ns	ns	ns	ns	ns
ILMN_1661886	328	APEX1	s	ns	ns	ns	ns	ns	ns	ns	ns	ns	ns	ns	ns	ns	ns	ns
ILMN_1661888	4205	MEF2A	s	ns	ns	ns	ns	ns	ns	ns	ns	ns	ns	ns	ns	ns	ns	ns
ILMN_1661945	81892	C14orf156	s	ns	ns	ns	ns	ns	ns	ns	ns	ns	ns	ns	ns	ns	ns	ns
ILMN_1662038	9215	LARGE	s	ns	ns	ns	ns	ns	ns	ns	ns	ns	ns	ns	ns	ns	ns	ns
ILMN_1662129	5955	RCN2	s	ns	ns	ns	ns	ns	ns	ns	ns	ns	ns	ns	ns	ns	ns	ns
ILMN_1662130	730316	LOC730316	s	ns	ns	ns	ns	ns	ns	ns	ns	ns	ns	ns	ns	ns	ns	ns
ILMN_1662174	94103	ORMDL3	s	ns	ns	ns	ns	ns	ns	ns	ns	ns	ns	ns	ns	ns	ns	ns
ILMN_1662198	5905	RANGAP1	s	ns	ns	ns	ns	ns	ns	ns	ns	ns	ns	ns	ns	ns	ns	ns
ILMN_1662263	145553	MDP-1	s	ns	ns	ns	ns	ns	ns	ns	ns	ns	ns	ns	ns	ns	ns	ns
ILMN_1662318	29080	CCDC59	s	ns	ns	ns	ns	ns	ns	ns	ns	ns	ns	ns	ns	ns	ns	ns
ILMN_1662334	9093	DNAJA3	s	ns	ns	ns	ns	ns	ns	ns	ns	ns	ns	ns	ns	ns	ns	ns
ILMN_1662364	16	AARS	s	ns	ns	ns	ns	ns	ns	ns	ns	ns	ns	ns	ns	ns	ns	ns
ILMN_1662383	9406	ZRANB2	s	ns	ns	ns	ns	ns	ns	ns	ns	ns	ns	ns	ns	ns	ns	ns
ILMN_1662409	440525	LOC440525	s	ns	ns	ns	ns	ns	ns	ns	ns	ns	ns	ns	ns	ns	ns	ns
ILMN_1662426	1175	AP2S1	s	ns	ns	ns	ns	ns	ns	ns	ns	ns	ns	ns	ns	ns	ns	ns
ILMN_1662427	11156	PTP4A3	s	ns	ns	ns	ns	ns	ns	ns	ns	ns	ns	ns	ns	ns	ns	ns
ILMN_1662438	6647	SOD1	s	ns	ns	ns	ns	ns	ns	ns	ns	ns	ns	ns	ns	ns	ns	ns
ILMN_1662451	2208	FCER2	s	ns	ns	ns	ns	ns	ns	ns	ns	ns	ns	ns	ns	ns	ns	ns
ILMN_1662463	28991	COMMD5	s	ns	ns	ns	ns	ns	ns	ns	ns	ns	ns	ns	ns	ns	ns	ns
ILMN_1662470	219738	C10orf35	s	ns	ns	ns	ns	ns	ns	ns	ns	ns	ns	ns	ns	ns	ns	ns
ILMN_1662483	11042	SMA5	s	ns	ns	ns	ns	ns	ns	ns	ns	ns	ns	ns	ns	ns	ns	ns
ILMN_1662524	3577	IL8RA	s	ns	ns	ns	ns	ns	ns	ns	ns	ns	ns	ns	ns	ns	ns	ns
ILMN_1662618	8878	SQSTM1	s	ns	ns	ns	ns	ns	ns	ns	ns	ns	ns	ns	ns	ns	ns	ns
ILMN_1662619	7035	TFPI	s	ns	ns	ns	ns	ns	ns	ns	ns	ns	ns	ns	ns	ns	ns	ns
ILMN_1662719	60313	GPBP1L1	s	ns	ns	ns	ns	ns	ns	ns	ns	ns	ns	ns	ns	ns	ns	ns
ILMN_1662795	760	CA2	s	ns	ns	ns	ns	ns	ns	ns	ns	ns	ns	ns	ns	ns	ns	ns
ILMN_1662896	55717	BRWD2	s	ns	ns	ns	ns	ns	ns	ns	ns	ns	ns	ns	ns	ns	ns	ns
ILMN_1662932	3936	LCP1	s	ns	ns	ns	ns	ns	ns	ns	ns	ns	ns	ns	ns	ns	ns	ns
ILMN_1662954	10574	CCT7	s	ns	ns	ns	ns	ns	ns	ns	ns	ns	ns	ns	ns	ns	ns	ns
ILMN_1662964	10196	PRMT3	s	ns	ns	ns	ns	ns	ns	ns	ns	ns	ns	ns	ns	ns	ns	ns
ILMN_1662970	7784	ZP3	s	ns	ns	ns	ns	ns	ns	ns	ns	ns	ns	ns	ns	ns	ns	ns
ILMN_1662973	3732	CD82	s	ns	ns	ns	ns	ns	ns	ns	ns	ns	ns	ns	ns	ns	ns	ns
ILMN_1663035	6720	SREBF1	s	ns	ns	ns	ns	ns	ns	ns	ns	ns	ns	ns	ns	ns	ns	ns
ILMN_1663068	339541	MGC33556	s	ns	ns	ns	ns	ns	ns	ns	ns	ns	ns	ns	ns	ns	ns	ns
ILMN_1663119	1824	DSC2	s	ns	ns	ns	ns	ns	ns	ns	ns	ns	ns	ns	ns	ns	ns	ns
ILMN_1663132	90956	ADCK2	s	ns	ns	ns	ns	ns	ns	ns	ns	ns	ns	ns	ns	ns	ns	ns
ILMN_1663160	26152	ZNF337	s	ns	ns	ns	ns	ns	ns	ns	ns	ns	ns	ns	ns	ns	ns	ns
ILMN_1663195	4176	MCM7	s	ns	ns	ns	ns	ns	ns	ns	ns	ns	ns	ns	ns	ns	ns	ns
ILMN_1663381	10758	TRAF3IP2	s	ns	ns	ns	ns	ns	ns	ns	ns	ns	ns	ns	ns	ns	ns	ns
ILMN_1663407	6834	SURF1	s	ns	ns	ns	ns	ns	ns	ns	ns	ns	ns	ns	ns	ns	ns	ns
ILMN_1663416	642250	LOC642250	s	ns	ns	ns	ns	ns	ns	ns	ns	ns	ns	ns	ns	ns	ns	ns
ILMN_1663489	23304	UBR2	s	ns	ns	ns	ns	ns	ns	ns	ns	ns	ns	ns	ns	ns	ns	ns
ILMN_1663512	1329	COX5B	s	ns	ns	ns	ns	ns	ns	ns	ns	ns	ns	ns	ns	ns	ns	ns
ILMN_1663532	55188	RIC8B	s	ns	ns	ns	ns	ns	ns	ns	ns	ns	ns	ns	ns	ns	ns	ns
ILMN_1663541	11285	B4GALT7	s	ns	ns	ns	ns	ns	ns	ns	ns	ns	ns	ns	ns	ns	ns	ns
ILMN_1663627	9844	ELMO1	s	ns	ns	ns	ns	ns	ns	ns	ns	ns	ns	ns	ns	ns	ns	ns
ILMN_1663664	55173	MRPS10	s	ns	ns	ns	ns	ns	ns	ns	ns	ns	ns	ns	ns	ns	ns	ns
ILMN_1663699	28232	SLCO3A1	s	ns	ns	ns	ns	ns	ns	ns	ns	ns	ns	ns	ns	ns	ns	ns
ILMN_1663893	150147	C21orf128	s	ns	ns	ns	ns	ns	ns	ns	ns	ns	ns	ns	ns	ns	ns	ns
ILMN_1664006	178	AGL	s	ns	ns	ns	ns	ns	ns	ns	ns	ns	ns	ns	ns	ns	ns	ns
ILMN_1664010	1997	ELF1	s	ns	ns	ns	ns	ns	ns	ns	ns	ns	ns	ns	ns	ns	ns	ns
ILMN_1664025	11264	PXMP4	s	ns	ns	ns	ns	ns	ns	ns	ns	ns	ns	ns	ns	ns	ns	ns
ILMN_1664028	1059	CENPB	s	ns	ns	ns	ns	ns	ns	ns	ns	ns	ns	ns	ns	ns	ns	ns
ILMN_1664030	81876	RAB1B	s	ns	ns	ns	ns	ns	ns	ns	ns	ns	ns	ns	ns	ns	ns	ns
ILMN_1664034	220992	ZNF485	s	ns	ns	ns	ns	ns	ns	ns	ns	ns	ns	ns	ns	ns	ns	ns
ILMN_1664047	777	CACNA1E	s	ns	ns	ns	ns	ns	ns	ns	ns	ns	ns	ns	ns	ns	ns	ns
ILMN_1664051	9117	SEC22C	s	ns	ns	ns	ns	ns	ns	ns	ns	ns	ns	ns	ns	ns	ns	ns
ILMN_1664063	199786	FAM129C	s	ns	ns	ns	ns	ns	ns	ns	ns	ns	ns	ns	ns	ns	ns	ns
ILMN_1664122	5777	PTPN6	s	ns	ns	ns	ns	ns	ns	ns	ns	ns	ns	ns	ns	ns	ns	ns
ILMN_1664175	8674	VAMP4	s	ns	ns	ns	ns	ns	ns	ns	ns	ns	ns	ns	ns	ns	ns	ns
ILMN_1664177	127002	ATXN7L2	s	ns	ns	ns	ns	ns	ns	ns	ns	ns	ns	ns	ns	ns	ns	ns
ILMN_1664233	644590	LOC644590	s	ns	ns	ns	ns	ns	ns	ns	ns	ns	ns	ns	ns	ns	ns	ns
ILMN_1664242	55184	C20orf12	s	ns	ns	ns	ns	ns	ns	ns	ns	ns	ns	ns	ns	ns	ns	ns
ILMN_1664243	55850	USE1	s	ns	ns	ns	ns	ns	ns	ns	ns	ns	ns	ns	ns	ns	ns	ns
ILMN_1664265	2041	EPHA1	s	ns	ns	ns	ns	ns	ns	ns	ns	ns	ns	ns	ns	ns	ns	ns
ILMN_1664276	50945	TBX22	s	ns	ns	ns	ns	ns	ns	ns	ns	ns	ns	ns	ns	ns	ns	ns
ILMN_1664367	51004	COQ6	s	ns	ns	ns	ns	ns	ns	ns	ns	ns	ns	ns	ns	ns	ns	ns
ILMN_1664371	84641	HIATL1	s	ns	ns	ns	ns	ns	ns	ns	ns	ns	ns	ns	ns	ns	ns	ns
ILMN_1664398	651621	LOC651621	s	ns	ns	ns	ns	ns	ns	ns	ns	ns	ns	ns	ns	ns	ns	ns
ILMN_1664439	6872	TAF1	s	ns	ns	ns	ns	ns	ns	ns	ns	ns	ns	ns	ns	ns	ns	ns
ILMN_1664453	653276	LOC653276	s	ns	ns	ns	ns	ns	ns	ns	ns	ns	ns	ns	ns	ns	ns	ns
ILMN_1664464	5730	PTGDS	s	ns	ns	ns	ns	ns	ns	ns	ns	ns	ns	ns	ns	ns	ns	ns
ILMN_1664466	55958	KLHL9	s	ns	ns	ns	ns	ns	ns	ns	ns	ns	ns	ns	ns	ns	ns	ns
ILMN_1664511	10403	NDC80	s	ns	ns	ns	ns	ns	ns	ns	ns	ns	ns	ns	ns	ns	ns	ns
ILMN_1664577	1738	DLD	s	ns	ns	ns	ns	ns	ns	ns	ns	ns	ns	ns	ns	ns	ns	ns
ILMN_1664608	3632	INPP5A	s	ns	ns	ns	ns	ns	ns	ns	ns	ns	ns	ns	ns	ns	ns	ns
ILMN_1664610	402057	LOC402057	s	ns	ns	ns	ns	ns	ns	ns	ns	ns	ns	ns	ns	ns	ns	ns
ILMN_1664630	1111	CHEK1	s	ns	ns	ns	ns	ns	ns	ns	ns	ns	ns	ns	ns	ns	ns	ns
ILMN_1664646	221078	NSUN6	s	ns	ns	ns	ns	ns	ns	ns	ns	ns	ns	ns	ns	ns	ns	ns
ILMN_1664691	27071	DAPP1	s	ns	ns	ns	ns	ns	ns	ns	ns	ns	ns	ns	ns	ns	ns	ns
ILMN_1664706	653604	LOC653604	s	ns	ns	ns	ns	ns	ns	ns	ns	ns	ns	ns	ns	ns	ns	ns
ILMN_1664772	493	ATP2B4	s	ns	ns	ns	ns	ns	ns	ns	ns	ns	ns	ns	ns	ns	ns	ns
ILMN_1664802	26118	WSB1	s	ns	ns	ns	ns	ns	ns	ns	ns	ns	ns	ns	ns	ns	ns	ns
ILMN_1664826	254170	FBXO33	s	ns	ns	ns	ns	ns	ns	ns	ns	ns	ns	ns	ns	ns	ns	ns
ILMN_1664912	3590	IL11RA	s	ns	ns	ns	ns	ns	ns	ns	ns	ns	ns	ns	ns	ns	ns	ns
ILMN_1664931	2961	GTF2E2	s	ns	ns	ns	ns	ns	ns	ns	ns	ns	ns	ns	ns	ns	ns	ns
ILMN_1664956	29101	SSU72	s	ns	ns	ns	ns	ns	ns	ns	ns	ns	ns	ns	ns	ns	ns	ns
ILMN_1664994	9562	MINPP1	s	ns	ns	ns	ns	ns	ns	ns	ns	ns	ns	ns	ns	ns	ns	ns
ILMN_1665004	22794	CASC3	s	ns	ns	ns	ns	ns	ns	ns	ns	ns	ns	ns	ns	ns	ns	ns
ILMN_1665060	643888	LOC643888	s	ns	ns	ns	ns	ns	ns	ns	ns	ns	ns	ns	ns	ns	ns	ns
ILMN_1665065	10955	SERINC3	s	ns	ns	ns	ns	ns	ns	ns	ns	ns	ns	ns	ns	ns	ns	ns
ILMN_1665095	26012	NELF	s	ns	ns	ns	ns	ns	ns	ns	ns	ns	ns	ns	ns	ns	ns	ns
ILMN_1665107	9270	ITGB1BP1	s	ns	ns	ns	ns	ns	ns	ns	ns	ns	ns	ns	ns	ns	ns	ns
ILMN_1665135	5930	RBBP6	s	ns	ns	ns	ns	ns	ns	ns	ns	ns	ns	ns	ns	ns	ns	ns
ILMN_1665148	648249	LOC648249	s	ns	ns	ns	ns	ns	ns	ns	ns	ns	ns	ns	ns	ns	ns	ns
ILMN_1665291	51667	NUB1	s	ns	ns	ns	ns	ns	ns	ns	ns	ns	ns	ns	ns	ns	ns	ns
ILMN_1665311	246744	STH	s	ns	ns	ns	ns	ns	ns	ns	ns	ns	ns	ns	ns	ns	ns	ns
ILMN_1665331	275	AMT	s	ns	ns	ns	ns	ns	ns	ns	ns	ns	ns	ns	ns	ns	ns	ns
ILMN_1665357	2060	EPS15	s	ns	ns	ns	ns	ns	ns	ns	ns	ns	ns	ns	ns	ns	ns	ns
ILMN_1665423	80829	ZFP91	s	ns	ns	ns	ns	ns	ns	ns	ns	ns	ns	ns	ns	ns	ns	ns
ILMN_1665455	123879	DCUN1D3	s	ns	ns	ns	ns	ns	ns	ns	ns	ns	ns	ns	ns	ns	ns	ns
ILMN_1665526	6919	TCEA2	s	ns	ns	ns	ns	ns	ns	ns	ns	ns	ns	ns	ns	ns	ns	ns
ILMN_1665538	6502	SKP2	s	ns	ns	ns	ns	ns	ns	ns	ns	ns	ns	ns	ns	ns	ns	ns
ILMN_1665559	1017	CDK2	s	ns	ns	ns	ns	ns	ns	ns	ns	ns	ns	ns	ns	ns	ns	ns
ILMN_1665696	1945	EFNA4	s	ns	ns	ns	ns	ns	ns	ns	ns	ns	ns	ns	ns	ns	ns	ns
ILMN_1665717	1968	EIF2S3	s	ns	ns	ns	ns	ns	ns	ns	ns	ns	ns	ns	ns	ns	ns	ns
ILMN_1665730	23456	ABCB10	s	ns	ns	ns	ns	ns	ns	ns	ns	ns	ns	ns	ns	ns	ns	ns
ILMN_1665736	648024	LOC648024	s	ns	ns	ns	ns	ns	ns	ns	ns	ns	ns	ns	ns	ns	ns	ns
ILMN_1665738	2313	FLI1	s	ns	ns	ns	ns	ns	ns	ns	ns	ns	ns	ns	ns	ns	ns	ns
ILMN_1665761	64919	BCL11B	s	ns	ns	ns	ns	ns	ns	ns	ns	ns	ns	ns	ns	ns	ns	ns
ILMN_1665797	1434	CSE1L	s	ns	ns	ns	ns	ns	ns	ns	ns	ns	ns	ns	ns	ns	ns	ns
ILMN_1665859	5873	RAB27A	s	ns	ns	ns	ns	ns	ns	ns	ns	ns	ns	ns	ns	ns	ns	ns
ILMN_1665871	23357	ANGEL1	s	ns	ns	ns	ns	ns	ns	ns	ns	ns	ns	ns	ns	ns	ns	ns
ILMN_1665909	3927	LASP1	s	ns	ns	ns	ns	ns	ns	ns	ns	ns	ns	ns	ns	ns	ns	ns
ILMN_1666007	122553	TRAPPC6B	s	ns	ns	ns	ns	ns	ns	ns	ns	ns	ns	ns	ns	ns	ns	ns
ILMN_1666050	83590	TMUB1	s	ns	ns	ns	ns	ns	ns	ns	ns	ns	ns	ns	ns	ns	ns	ns
ILMN_1666096	2181	ACSL3	s	ns	ns	ns	ns	ns	ns	ns	ns	ns	ns	ns	ns	ns	ns	ns
ILMN_1666178	90313	TP53I13	s	ns	ns	ns	ns	ns	ns	ns	ns	ns	ns	ns	ns	ns	ns	ns
ILMN_1666192	84516	DCTN5	s	ns	ns	ns	ns	ns	ns	ns	ns	ns	ns	ns	ns	ns	ns	ns
ILMN_1666206	55876	GSDML	s	ns	ns	ns	ns	ns	ns	ns	ns	ns	ns	ns	ns	ns	ns	ns
ILMN_1666208	55320	C14orf106	s	ns	ns	ns	ns	ns	ns	ns	ns	ns	ns	ns	ns	ns	ns	ns
ILMN_1666258	267	AMFR	s	ns	ns	ns	ns	ns	ns	ns	ns	ns	ns	ns	ns	ns	ns	ns
ILMN_1666306	402055	SRRD	s	ns	ns	ns	ns	ns	ns	ns	ns	ns	ns	ns	ns	ns	ns	ns
ILMN_1666325	144245	ALG10B	s	ns	ns	ns	ns	ns	ns	ns	ns	ns	ns	ns	ns	ns	ns	ns
ILMN_1666420	168417	ZNF679	s	ns	ns	ns	ns	ns	ns	ns	ns	ns	ns	ns	ns	ns	ns	ns
ILMN_1666552	7627	ZNF75A	s	ns	ns	ns	ns	ns	ns	ns	ns	ns	ns	ns	ns	ns	ns	ns
ILMN_1666624	11159	RABL2A	s	ns	ns	ns	ns	ns	ns	ns	ns	ns	ns	ns	ns	ns	ns	ns
ILMN_1666706	645676	LOC645676	s	ns	ns	ns	ns	ns	ns	ns	ns	ns	ns	ns	ns	ns	ns	ns
ILMN_1666713	10434	LYPLA1	s	ns	ns	ns	ns	ns	ns	ns	ns	ns	ns	ns	ns	ns	ns	ns
ILMN_1666733	3576	IL8	s	ns	ns	ns	ns	ns	ns	ns	ns	ns	ns	ns	ns	ns	ns	ns
ILMN_1666761	5529	PPP2R5E	s	ns	ns	ns	ns	ns	ns	ns	ns	ns	ns	ns	ns	ns	ns	ns
ILMN_1666827	60684	C4orf41	s	ns	ns	ns	ns	ns	ns	ns	ns	ns	ns	ns	ns	ns	ns	ns
ILMN_1666885	546	ATRX	s	ns	ns	ns	ns	ns	ns	ns	ns	ns	ns	ns	ns	ns	ns	ns
ILMN_1666902	221188	GPR114	s	ns	ns	ns	ns	ns	ns	ns	ns	ns	ns	ns	ns	ns	ns	ns
ILMN_1666976	23646	PLD3	s	ns	ns	ns	ns	ns	ns	ns	ns	ns	ns	ns	ns	ns	ns	ns
ILMN_1667016	11124	FAF1	s	ns	ns	ns	ns	ns	ns	ns	ns	ns	ns	ns	ns	ns	ns	ns
ILMN_1667030	3281	HSBP1	s	ns	ns	ns	ns	ns	ns	ns	ns	ns	ns	ns	ns	ns	ns	ns
ILMN_1667034	55066	PDPR	s	ns	ns	ns	ns	ns	ns	ns	ns	ns	ns	ns	ns	ns	ns	ns
ILMN_1667068	56829	ZC3HAV1	s	ns	ns	ns	ns	ns	ns	ns	ns	ns	ns	ns	ns	ns	ns	ns
ILMN_1667112	25793	FBXO7	s	ns	ns	ns	ns	ns	ns	ns	ns	ns	ns	ns	ns	ns	ns	ns
ILMN_1667162	4824	NKX3-1	s	ns	ns	ns	ns	ns	ns	ns	ns	ns	ns	ns	ns	ns	ns	ns
ILMN_1667239	3628	INPP1	s	ns	ns	ns	ns	ns	ns	ns	ns	ns	ns	ns	ns	ns	ns	ns
ILMN_1667257	6390	SDHB	s	ns	ns	ns	ns	ns	ns	ns	ns	ns	ns	ns	ns	ns	ns	ns
ILMN_1667322	84765	ZNF577	s	ns	ns	ns	ns	ns	ns	ns	ns	ns	ns	ns	ns	ns	ns	ns
ILMN_1667330	113386	LOC113386	s	ns	ns	ns	ns	ns	ns	ns	ns	ns	ns	ns	ns	ns	ns	ns
ILMN_1667356	129285	CCDC128	s	ns	ns	ns	ns	ns	ns	ns	ns	ns	ns	ns	ns	ns	ns	ns
ILMN_1667510	91574	C12orf65	s	ns	ns	ns	ns	ns	ns	ns	ns	ns	ns	ns	ns	ns	ns	ns
ILMN_1667589	284349	ZNF283	s	ns	ns	ns	ns	ns	ns	ns	ns	ns	ns	ns	ns	ns	ns	ns
ILMN_1667592	29780	PARVB	s	ns	ns	ns	ns	ns	ns	ns	ns	ns	ns	ns	ns	ns	ns	ns
ILMN_1667594	7071	KLF10	s	ns	ns	ns	ns	ns	ns	ns	ns	ns	ns	ns	ns	ns	ns	ns
ILMN_1667825	197259	MLKL	s	ns	ns	ns	ns	ns	ns	ns	ns	ns	ns	ns	ns	ns	ns	ns
ILMN_1667925	79031	PDCL3	s	ns	ns	ns	ns	ns	ns	ns	ns	ns	ns	ns	ns	ns	ns	ns
ILMN_1667932	652726	LOC652726	s	ns	ns	ns	ns	ns	ns	ns	ns	ns	ns	ns	ns	ns	ns	ns
ILMN_1667970	728825	LOC728825	s	ns	ns	ns	ns	ns	ns	ns	ns	ns	ns	ns	ns	ns	ns	ns
ILMN_1668065	84173	RBED1	s	ns	ns	ns	ns	ns	ns	ns	ns	ns	ns	ns	ns	ns	ns	ns
ILMN_1668090	10494	STK25	s	ns	ns	ns	ns	ns	ns	ns	ns	ns	ns	ns	ns	ns	ns	ns
ILMN_1668194	114783	LMTK3	s	ns	ns	ns	ns	ns	ns	ns	ns	ns	ns	ns	ns	ns	ns	ns
ILMN_1668228	136143	LOC136143	s	ns	ns	ns	ns	ns	ns	ns	ns	ns	ns	ns	ns	ns	ns	ns
ILMN_1668270	84243	ZDHHC18	s	ns	ns	ns	ns	ns	ns	ns	ns	ns	ns	ns	ns	ns	ns	ns
ILMN_1668277	640	BLK	s	ns	ns	ns	ns	ns	ns	ns	ns	ns	ns	ns	ns	ns	ns	ns
ILMN_1668312	56606	SLC2A9	s	ns	ns	ns	ns	ns	ns	ns	ns	ns	ns	ns	ns	ns	ns	ns
ILMN_1668345	220323	OAF	s	ns	ns	ns	ns	ns	ns	ns	ns	ns	ns	ns	ns	ns	ns	ns
ILMN_1668369	11140	CDC37	s	ns	ns	ns	ns	ns	ns	ns	ns	ns	ns	ns	ns	ns	ns	ns
ILMN_1668411	2274	FHL2	s	ns	ns	ns	ns	ns	ns	ns	ns	ns	ns	ns	ns	ns	ns	ns
ILMN_1668417	7456	WASPIP	s	ns	ns	ns	ns	ns	ns	ns	ns	ns	ns	ns	ns	ns	ns	ns
ILMN_1668463	6651	SON	s	ns	ns	ns	ns	ns	ns	ns	ns	ns	ns	ns	ns	ns	ns	ns
ILMN_1668469	23240	KIAA0922	s	ns	ns	ns	ns	ns	ns	ns	ns	ns	ns	ns	ns	ns	ns	ns
ILMN_1668514	23396	PIP5K1C	s	ns	ns	ns	ns	ns	ns	ns	ns	ns	ns	ns	ns	ns	ns	ns
ILMN_1668559	6001	RGS10	s	ns	ns	ns	ns	ns	ns	ns	ns	ns	ns	ns	ns	ns	ns	ns
ILMN_1668683	4297	MLL	s	ns	ns	ns	ns	ns	ns	ns	ns	ns	ns	ns	ns	ns	ns	ns
ILMN_1668713	126626	MGC29891	s	ns	ns	ns	ns	ns	ns	ns	ns	ns	ns	ns	ns	ns	ns	ns
ILMN_1668726	4801	NFYB	s	ns	ns	ns	ns	ns	ns	ns	ns	ns	ns	ns	ns	ns	ns	ns
ILMN_1668822	10538	BATF	s	ns	ns	ns	ns	ns	ns	ns	ns	ns	ns	ns	ns	ns	ns	ns
ILMN_1668847	11060	WWP2	s	ns	ns	ns	ns	ns	ns	ns	ns	ns	ns	ns	ns	ns	ns	ns
ILMN_1669064	55552	ZNF823	s	ns	ns	ns	ns	ns	ns	ns	ns	ns	ns	ns	ns	ns	ns	ns
ILMN_1669094	79894	ZNF672	s	ns	ns	ns	ns	ns	ns	ns	ns	ns	ns	ns	ns	ns	ns	ns
ILMN_1669102	517	ATP5G2	s	ns	ns	ns	ns	ns	ns	ns	ns	ns	ns	ns	ns	ns	ns	ns
ILMN_1669113	22809	ATF5	s	ns	ns	ns	ns	ns	ns	ns	ns	ns	ns	ns	ns	ns	ns	ns
ILMN_1669142	80155	NARG1	s	ns	ns	ns	ns	ns	ns	ns	ns	ns	ns	ns	ns	ns	ns	ns
ILMN_1669189	83593	RASSF5	s	ns	ns	ns	ns	ns	ns	ns	ns	ns	ns	ns	ns	ns	ns	ns
ILMN_1669259	54851	ANKRD49	s	ns	ns	ns	ns	ns	ns	ns	ns	ns	ns	ns	ns	ns	ns	ns
ILMN_1669286	7534	YWHAZ	s	ns	ns	ns	ns	ns	ns	ns	ns	ns	ns	ns	ns	ns	ns	ns
ILMN_1669308	7862	BRPF1	s	ns	ns	ns	ns	ns	ns	ns	ns	ns	ns	ns	ns	ns	ns	ns
ILMN_1669321	4145	MATK	s	ns	ns	ns	ns	ns	ns	ns	ns	ns	ns	ns	ns	ns	ns	ns
ILMN_1669323	25825	BACE2	s	ns	ns	ns	ns	ns	ns	ns	ns	ns	ns	ns	ns	ns	ns	ns
ILMN_1669443	642384	LOC642384	s	ns	ns	ns	ns	ns	ns	ns	ns	ns	ns	ns	ns	ns	ns	ns
ILMN_1669523	2353	FOS	s	ns	ns	ns	ns	ns	ns	ns	ns	ns	ns	ns	ns	ns	ns	ns
ILMN_1669553	10477	UBE2E3	s	ns	ns	ns	ns	ns	ns	ns	ns	ns	ns	ns	ns	ns	ns	ns
ILMN_1669572	55658	RNF126	s	ns	ns	ns	ns	ns	ns	ns	ns	ns	ns	ns	ns	ns	ns	ns
ILMN_1669633	52	ACP1	s	ns	ns	ns	ns	ns	ns	ns	ns	ns	ns	ns	ns	ns	ns	ns
ILMN_1669645	5310	PKD1	s	ns	ns	ns	ns	ns	ns	ns	ns	ns	ns	ns	ns	ns	ns	ns
ILMN_1669663	613	BCR	s	ns	ns	ns	ns	ns	ns	ns	ns	ns	ns	ns	ns	ns	ns	ns
ILMN_1669691	650433	LOC650433	s	ns	ns	ns	ns	ns	ns	ns	ns	ns	ns	ns	ns	ns	ns	ns
ILMN_1669692	22806	IKZF3	s	ns	ns	ns	ns	ns	ns	ns	ns	ns	ns	ns	ns	ns	ns	ns
ILMN_1669831	116843	C6orf192	s	ns	ns	ns	ns	ns	ns	ns	ns	ns	ns	ns	ns	ns	ns	ns
ILMN_1669888	1475	CSTA	s	ns	ns	ns	ns	ns	ns	ns	ns	ns	ns	ns	ns	ns	ns	ns
ILMN_1670028	9663	LPIN2	s	ns	ns	ns	ns	ns	ns	ns	ns	ns	ns	ns	ns	ns	ns	ns
ILMN_1670134	3992	FADS1	s	ns	ns	ns	ns	ns	ns	ns	ns	ns	ns	ns	ns	ns	ns	ns
ILMN_1670172	55339	WDR33	s	ns	ns	ns	ns	ns	ns	ns	ns	ns	ns	ns	ns	ns	ns	ns
ILMN_1670218	118460	EXOSC6	s	ns	ns	ns	ns	ns	ns	ns	ns	ns	ns	ns	ns	ns	ns	ns
ILMN_1670302	3101	HK3	s	ns	ns	ns	ns	ns	ns	ns	ns	ns	ns	ns	ns	ns	ns	ns
ILMN_1670439	84248	FYTTD1	s	ns	ns	ns	ns	ns	ns	ns	ns	ns	ns	ns	ns	ns	ns	ns
ILMN_1670456	79171	RBM42	s	ns	ns	ns	ns	ns	ns	ns	ns	ns	ns	ns	ns	ns	ns	ns
ILMN_1670561	90843	TCEAL8	s	ns	ns	ns	ns	ns	ns	ns	ns	ns	ns	ns	ns	ns	ns	ns
ILMN_1670570	4601	MXI1	s	ns	ns	ns	ns	ns	ns	ns	ns	ns	ns	ns	ns	ns	ns	ns
ILMN_1670576	3663	IRF5	s	ns	ns	ns	ns	ns	ns	ns	ns	ns	ns	ns	ns	ns	ns	ns
ILMN_1670609	475	ATOX1	s	ns	ns	ns	ns	ns	ns	ns	ns	ns	ns	ns	ns	ns	ns	ns
ILMN_1670664	84919	PPP1R15B	s	ns	ns	ns	ns	ns	ns	ns	ns	ns	ns	ns	ns	ns	ns	ns
ILMN_1670764	29761	USP25	s	ns	ns	ns	ns	ns	ns	ns	ns	ns	ns	ns	ns	ns	ns	ns
ILMN_1670809	11270	NRM	s	ns	ns	ns	ns	ns	ns	ns	ns	ns	ns	ns	ns	ns	ns	ns
ILMN_1670817	80273	GRPEL1	s	ns	ns	ns	ns	ns	ns	ns	ns	ns	ns	ns	ns	ns	ns	ns
ILMN_1670844	23596	OPN3	s	ns	ns	ns	ns	ns	ns	ns	ns	ns	ns	ns	ns	ns	ns	ns
ILMN_1670870	214	ALCAM	s	ns	ns	ns	ns	ns	ns	ns	ns	ns	ns	ns	ns	ns	ns	ns
ILMN_1670878	91746	YTHDC1	s	ns	ns	ns	ns	ns	ns	ns	ns	ns	ns	ns	ns	ns	ns	ns
ILMN_1670899	2201	FBN2	s	ns	ns	ns	ns	ns	ns	ns	ns	ns	ns	ns	ns	ns	ns	ns
ILMN_1670931	23244	PDS5A	s	ns	ns	ns	ns	ns	ns	ns	ns	ns	ns	ns	ns	ns	ns	ns
ILMN_1670948	90121	TSR2	s	ns	ns	ns	ns	ns	ns	ns	ns	ns	ns	ns	ns	ns	ns	ns
ILMN_1670970	5530	PPP3CA	s	ns	ns	ns	ns	ns	ns	ns	ns	ns	ns	ns	ns	ns	ns	ns
ILMN_1671004	11232	POLG2	s	ns	ns	ns	ns	ns	ns	ns	ns	ns	ns	ns	ns	ns	ns	ns
ILMN_1671028	9967	THRAP3	s	ns	ns	ns	ns	ns	ns	ns	ns	ns	ns	ns	ns	ns	ns	ns
ILMN_1671116	152002	C3orf21	s	ns	ns	ns	ns	ns	ns	ns	ns	ns	ns	ns	ns	ns	ns	ns
ILMN_1671158	28998	MRPL13	s	ns	ns	ns	ns	ns	ns	ns	ns	ns	ns	ns	ns	ns	ns	ns
ILMN_1671207	55699	IARS2	s	ns	ns	ns	ns	ns	ns	ns	ns	ns	ns	ns	ns	ns	ns	ns
ILMN_1671263	8912	CACNA1H	s	ns	ns	ns	ns	ns	ns	ns	ns	ns	ns	ns	ns	ns	ns	ns
ILMN_1671265	3622	ING2	s	ns	ns	ns	ns	ns	ns	ns	ns	ns	ns	ns	ns	ns	ns	ns
ILMN_1671288	4957	ODF2	s	ns	ns	ns	ns	ns	ns	ns	ns	ns	ns	ns	ns	ns	ns	ns
ILMN_1671291	8668	EIF3I	s	ns	ns	ns	ns	ns	ns	ns	ns	ns	ns	ns	ns	ns	ns	ns
ILMN_1671337	6518	SLC2A5	s	ns	ns	ns	ns	ns	ns	ns	ns	ns	ns	ns	ns	ns	ns	ns
ILMN_1671404	6840	SVIL	s	ns	ns	ns	ns	ns	ns	ns	ns	ns	ns	ns	ns	ns	ns	ns
ILMN_1671442	23160	WDR43	s	ns	ns	ns	ns	ns	ns	ns	ns	ns	ns	ns	ns	ns	ns	ns
ILMN_1671452	65080	MRPL44	s	ns	ns	ns	ns	ns	ns	ns	ns	ns	ns	ns	ns	ns	ns	ns
ILMN_1671509	6348	CCL3	s	ns	ns	ns	ns	ns	ns	ns	ns	ns	ns	ns	ns	ns	ns	ns
ILMN_1671554	23175	LPIN1	s	ns	ns	ns	ns	ns	ns	ns	ns	ns	ns	ns	ns	ns	ns	ns
ILMN_1671703	59	ACTA2	s	ns	ns	ns	ns	ns	ns	ns	ns	ns	ns	ns	ns	ns	ns	ns
ILMN_1671721	731396	LOC731396	s	ns	ns	ns	ns	ns	ns	ns	ns	ns	ns	ns	ns	ns	ns	ns
ILMN_1671731	60370	AVPI1	s	ns	ns	ns	ns	ns	ns	ns	ns	ns	ns	ns	ns	ns	ns	ns
ILMN_1671742	65110	UPF3A	s	ns	ns	ns	ns	ns	ns	ns	ns	ns	ns	ns	ns	ns	ns	ns
ILMN_1671837	644739	LOC644739	s	ns	ns	ns	ns	ns	ns	ns	ns	ns	ns	ns	ns	ns	ns	ns
ILMN_1671854	1731	2014-09-01	s	ns	ns	ns	ns	ns	ns	ns	ns	ns	ns	ns	ns	ns	ns	ns
ILMN_1671891	55022	PID1	s	ns	ns	ns	ns	ns	ns	ns	ns	ns	ns	ns	ns	ns	ns	ns
ILMN_1671893	27243	CHMP2A	s	ns	ns	ns	ns	ns	ns	ns	ns	ns	ns	ns	ns	ns	ns	ns
ILMN_1671969	7360	UGP2	s	ns	ns	ns	ns	ns	ns	ns	ns	ns	ns	ns	ns	ns	ns	ns
ILMN_1671992	650128	LOC650128	s	ns	ns	ns	ns	ns	ns	ns	ns	ns	ns	ns	ns	ns	ns	ns
ILMN_1672006	6741	SSB	s	ns	ns	ns	ns	ns	ns	ns	ns	ns	ns	ns	ns	ns	ns	ns
ILMN_1672024	389293	ISCA1L	s	ns	ns	ns	ns	ns	ns	ns	ns	ns	ns	ns	ns	ns	ns	ns
ILMN_1672042	57171	DOLPP1	s	ns	ns	ns	ns	ns	ns	ns	ns	ns	ns	ns	ns	ns	ns	ns
ILMN_1672043	375056	MIA3	s	ns	ns	ns	ns	ns	ns	ns	ns	ns	ns	ns	ns	ns	ns	ns
ILMN_1672114	8794	TNFRSF10C	s	ns	ns	ns	ns	ns	ns	ns	ns	ns	ns	ns	ns	ns	ns	ns
ILMN_1672124	51313	C4orf18	s	ns	ns	ns	ns	ns	ns	ns	ns	ns	ns	ns	ns	ns	ns	ns
ILMN_1672128	468	ATF4	s	ns	ns	ns	ns	ns	ns	ns	ns	ns	ns	ns	ns	ns	ns	ns
ILMN_1672135	284370	ZNF615	s	ns	ns	ns	ns	ns	ns	ns	ns	ns	ns	ns	ns	ns	ns	ns
ILMN_1672174	1889	ECE1	s	ns	ns	ns	ns	ns	ns	ns	ns	ns	ns	ns	ns	ns	ns	ns
ILMN_1672331	23118	MAP3K7IP2	s	ns	ns	ns	ns	ns	ns	ns	ns	ns	ns	ns	ns	ns	ns	ns
ILMN_1672356	338692	ANKRD13D	s	ns	ns	ns	ns	ns	ns	ns	ns	ns	ns	ns	ns	ns	ns	ns
ILMN_1672417	5790	PTPRCAP	s	ns	ns	ns	ns	ns	ns	ns	ns	ns	ns	ns	ns	ns	ns	ns
ILMN_1672446	6135	RPL11	s	ns	ns	ns	ns	ns	ns	ns	ns	ns	ns	ns	ns	ns	ns	ns
ILMN_1672496	3301	DNAJA1	s	ns	ns	ns	ns	ns	ns	ns	ns	ns	ns	ns	ns	ns	ns	ns
ILMN_1672504	8566	PDXK	s	ns	ns	ns	ns	ns	ns	ns	ns	ns	ns	ns	ns	ns	ns	ns
ILMN_1672554	23587	C17orf81	s	ns	ns	ns	ns	ns	ns	ns	ns	ns	ns	ns	ns	ns	ns	ns
ILMN_1672571	24144	TFIP11	s	ns	ns	ns	ns	ns	ns	ns	ns	ns	ns	ns	ns	ns	ns	ns
ILMN_1672591	6335	SCN9A	s	ns	ns	ns	ns	ns	ns	ns	ns	ns	ns	ns	ns	ns	ns	ns
ILMN_1672753	253725	FAM21C	s	ns	ns	ns	ns	ns	ns	ns	ns	ns	ns	ns	ns	ns	ns	ns
ILMN_1672807	11238	CA5B	s	ns	ns	ns	ns	ns	ns	ns	ns	ns	ns	ns	ns	ns	ns	ns
ILMN_1672834	85464	SSH2	s	ns	ns	ns	ns	ns	ns	ns	ns	ns	ns	ns	ns	ns	ns	ns
ILMN_1672961	652624	LOC652624	s	ns	ns	ns	ns	ns	ns	ns	ns	ns	ns	ns	ns	ns	ns	ns
ILMN_1672987	653596	LOC653596	s	ns	ns	ns	ns	ns	ns	ns	ns	ns	ns	ns	ns	ns	ns	ns
ILMN_1673069	91039	DPP9	s	ns	ns	ns	ns	ns	ns	ns	ns	ns	ns	ns	ns	ns	ns	ns
ILMN_1673113	2150	F2RL1	s	ns	ns	ns	ns	ns	ns	ns	ns	ns	ns	ns	ns	ns	ns	ns
ILMN_1673172	51098	IFT52	s	ns	ns	ns	ns	ns	ns	ns	ns	ns	ns	ns	ns	ns	ns	ns
ILMN_1673181	NA	SNORD100	s	ns	ns	ns	ns	ns	ns	ns	ns	ns	ns	ns	ns	ns	ns	ns
ILMN_1673185	53981	CPSF2	s	ns	ns	ns	ns	ns	ns	ns	ns	ns	ns	ns	ns	ns	ns	ns
ILMN_1673282	3920	LAMP2	s	ns	ns	ns	ns	ns	ns	ns	ns	ns	ns	ns	ns	ns	ns	ns
ILMN_1673329	340307	CTAGE6	s	ns	ns	ns	ns	ns	ns	ns	ns	ns	ns	ns	ns	ns	ns	ns
ILMN_1673369	22929	SEPHS1	s	ns	ns	ns	ns	ns	ns	ns	ns	ns	ns	ns	ns	ns	ns	ns
ILMN_1673478	51306	C5orf5	s	ns	ns	ns	ns	ns	ns	ns	ns	ns	ns	ns	ns	ns	ns	ns
ILMN_1673509	6158	RPL28	s	ns	ns	ns	ns	ns	ns	ns	ns	ns	ns	ns	ns	ns	ns	ns
ILMN_1673521	84634	KISS1R	s	ns	ns	ns	ns	ns	ns	ns	ns	ns	ns	ns	ns	ns	ns	ns
ILMN_1673529	85007	AGXT2L2	s	ns	ns	ns	ns	ns	ns	ns	ns	ns	ns	ns	ns	ns	ns	ns
ILMN_1673548	29094	HSPC159	s	ns	ns	ns	ns	ns	ns	ns	ns	ns	ns	ns	ns	ns	ns	ns
ILMN_1673638	6189	RPS3A	s	ns	ns	ns	ns	ns	ns	ns	ns	ns	ns	ns	ns	ns	ns	ns
ILMN_1673682	54815	GATAD2A	s	ns	ns	ns	ns	ns	ns	ns	ns	ns	ns	ns	ns	ns	ns	ns
ILMN_1673738	646483	LOC646483	s	ns	ns	ns	ns	ns	ns	ns	ns	ns	ns	ns	ns	ns	ns	ns
ILMN_1673769	3755	KCNG1	s	ns	ns	ns	ns	ns	ns	ns	ns	ns	ns	ns	ns	ns	ns	ns
ILMN_1673778	649270	LOC649270	s	ns	ns	ns	ns	ns	ns	ns	ns	ns	ns	ns	ns	ns	ns	ns
ILMN_1673793	256979	SUNC1	s	ns	ns	ns	ns	ns	ns	ns	ns	ns	ns	ns	ns	ns	ns	ns
ILMN_1673936	8570	KHSRP	s	ns	ns	ns	ns	ns	ns	ns	ns	ns	ns	ns	ns	ns	ns	ns
ILMN_1673960	27430	MAT2B	s	ns	ns	ns	ns	ns	ns	ns	ns	ns	ns	ns	ns	ns	ns	ns
ILMN_1673991	471	ATIC	s	ns	ns	ns	ns	ns	ns	ns	ns	ns	ns	ns	ns	ns	ns	ns
ILMN_1674009	8277	TKTL1	s	ns	ns	ns	ns	ns	ns	ns	ns	ns	ns	ns	ns	ns	ns	ns
ILMN_1674032	5825	ABCD3	s	ns	ns	ns	ns	ns	ns	ns	ns	ns	ns	ns	ns	ns	ns	ns
ILMN_1674038	1509	CTSD	s	ns	ns	ns	ns	ns	ns	ns	ns	ns	ns	ns	ns	ns	ns	ns
ILMN_1674069	54543	TOMM7	s	ns	ns	ns	ns	ns	ns	ns	ns	ns	ns	ns	ns	ns	ns	ns
ILMN_1674128	57703	KIAA1604	s	ns	ns	ns	ns	ns	ns	ns	ns	ns	ns	ns	ns	ns	ns	ns
ILMN_1674160	274	BIN1	s	ns	ns	ns	ns	ns	ns	ns	ns	ns	ns	ns	ns	ns	ns	ns
ILMN_1674201	441511	LOC441511	s	ns	ns	ns	ns	ns	ns	ns	ns	ns	ns	ns	ns	ns	ns	ns
ILMN_1674243	7037	TFRC	s	ns	ns	ns	ns	ns	ns	ns	ns	ns	ns	ns	ns	ns	ns	ns
ILMN_1674285	401233	LOC401233	s	ns	ns	ns	ns	ns	ns	ns	ns	ns	ns	ns	ns	ns	ns	ns
ILMN_1674394	57136	C20orf3	s	ns	ns	ns	ns	ns	ns	ns	ns	ns	ns	ns	ns	ns	ns	ns
ILMN_1674399	7702	ZNF143	s	ns	ns	ns	ns	ns	ns	ns	ns	ns	ns	ns	ns	ns	ns	ns
ILMN_1674411	26586	CKAP2	s	ns	ns	ns	ns	ns	ns	ns	ns	ns	ns	ns	ns	ns	ns	ns
ILMN_1674421	9777	TM9SF4	s	ns	ns	ns	ns	ns	ns	ns	ns	ns	ns	ns	ns	ns	ns	ns
ILMN_1674486	158358	KIAA2026	s	ns	ns	ns	ns	ns	ns	ns	ns	ns	ns	ns	ns	ns	ns	ns
ILMN_1674574	8876	VNN1	s	ns	ns	ns	ns	ns	ns	ns	ns	ns	ns	ns	ns	ns	ns	ns
ILMN_1674698	57505	AARS2	s	ns	ns	ns	ns	ns	ns	ns	ns	ns	ns	ns	ns	ns	ns	ns
ILMN_1674706	10797	MTHFD2	s	ns	ns	ns	ns	ns	ns	ns	ns	ns	ns	ns	ns	ns	ns	ns
ILMN_1674874	10227	MFSD10	s	ns	ns	ns	ns	ns	ns	ns	ns	ns	ns	ns	ns	ns	ns	ns
ILMN_1674891	57714	KIAA1618	s	ns	ns	ns	ns	ns	ns	ns	ns	ns	ns	ns	ns	ns	ns	ns
ILMN_1674983	387841	LOC387841	s	ns	ns	ns	ns	ns	ns	ns	ns	ns	ns	ns	ns	ns	ns	ns
ILMN_1675024	79656	C1orf165	s	ns	ns	ns	ns	ns	ns	ns	ns	ns	ns	ns	ns	ns	ns	ns
ILMN_1675038	3275	PRMT2	s	ns	ns	ns	ns	ns	ns	ns	ns	ns	ns	ns	ns	ns	ns	ns
ILMN_1675062	10398	MYL9	s	ns	ns	ns	ns	ns	ns	ns	ns	ns	ns	ns	ns	ns	ns	ns
ILMN_1675085	55236	UBA6	s	ns	ns	ns	ns	ns	ns	ns	ns	ns	ns	ns	ns	ns	ns	ns
ILMN_1675117	51170	HSD17B11	s	ns	ns	ns	ns	ns	ns	ns	ns	ns	ns	ns	ns	ns	ns	ns
ILMN_1675124	10521	DDX17	s	ns	ns	ns	ns	ns	ns	ns	ns	ns	ns	ns	ns	ns	ns	ns
ILMN_1675130	4782	NFIC	s	ns	ns	ns	ns	ns	ns	ns	ns	ns	ns	ns	ns	ns	ns	ns
ILMN_1675156	998	CDC42	s	ns	ns	ns	ns	ns	ns	ns	ns	ns	ns	ns	ns	ns	ns	ns
ILMN_1675186	4200	ME2	s	ns	ns	ns	ns	ns	ns	ns	ns	ns	ns	ns	ns	ns	ns	ns
ILMN_1675239	4701	NDUFA7	s	ns	ns	ns	ns	ns	ns	ns	ns	ns	ns	ns	ns	ns	ns	ns
ILMN_1675258	441268	LOC441268	s	ns	ns	ns	ns	ns	ns	ns	ns	ns	ns	ns	ns	ns	ns	ns
ILMN_1675391	123041	SLC24A4	s	ns	ns	ns	ns	ns	ns	ns	ns	ns	ns	ns	ns	ns	ns	ns
ILMN_1675401	643558	LOC643558	s	ns	ns	ns	ns	ns	ns	ns	ns	ns	ns	ns	ns	ns	ns	ns
ILMN_1675460	283412	LOC283412	s	ns	ns	ns	ns	ns	ns	ns	ns	ns	ns	ns	ns	ns	ns	ns
ILMN_1675479	9726	ZNF646	s	ns	ns	ns	ns	ns	ns	ns	ns	ns	ns	ns	ns	ns	ns	ns
ILMN_1675541	1933	EEF1B2	s	ns	ns	ns	ns	ns	ns	ns	ns	ns	ns	ns	ns	ns	ns	ns
ILMN_1675556	55113	XKR8	s	ns	ns	ns	ns	ns	ns	ns	ns	ns	ns	ns	ns	ns	ns	ns
ILMN_1675583	6687	SPG7	s	ns	ns	ns	ns	ns	ns	ns	ns	ns	ns	ns	ns	ns	ns	ns
ILMN_1675669	25998	IBTK	s	ns	ns	ns	ns	ns	ns	ns	ns	ns	ns	ns	ns	ns	ns	ns
ILMN_1675701	10827	C5orf3	s	ns	ns	ns	ns	ns	ns	ns	ns	ns	ns	ns	ns	ns	ns	ns
ILMN_1675844	9948	WDR1	s	ns	ns	ns	ns	ns	ns	ns	ns	ns	ns	ns	ns	ns	ns	ns
ILMN_1675852	650518	LOC650518	s	ns	ns	ns	ns	ns	ns	ns	ns	ns	ns	ns	ns	ns	ns	ns
ILMN_1675866	409	ARRB2	s	ns	ns	ns	ns	ns	ns	ns	ns	ns	ns	ns	ns	ns	ns	ns
ILMN_1675937	122416	ANKRD9	s	ns	ns	ns	ns	ns	ns	ns	ns	ns	ns	ns	ns	ns	ns	ns
ILMN_1675939	3459	IFNGR1	s	ns	ns	ns	ns	ns	ns	ns	ns	ns	ns	ns	ns	ns	ns	ns
ILMN_1675982	23163	GGA3	s	ns	ns	ns	ns	ns	ns	ns	ns	ns	ns	ns	ns	ns	ns	ns
ILMN_1676002	54870	QRICH1	s	ns	ns	ns	ns	ns	ns	ns	ns	ns	ns	ns	ns	ns	ns	ns
ILMN_1676003	5368	PNOC	s	ns	ns	ns	ns	ns	ns	ns	ns	ns	ns	ns	ns	ns	ns	ns
ILMN_1676091	388275	LOC388275	s	ns	ns	ns	ns	ns	ns	ns	ns	ns	ns	ns	ns	ns	ns	ns
ILMN_1676159	51765	MST4	s	ns	ns	ns	ns	ns	ns	ns	ns	ns	ns	ns	ns	ns	ns	ns
ILMN_1676191	55157	DARS2	s	ns	ns	ns	ns	ns	ns	ns	ns	ns	ns	ns	ns	ns	ns	ns
ILMN_1676289	4684	NCAM1	s	ns	ns	ns	ns	ns	ns	ns	ns	ns	ns	ns	ns	ns	ns	ns
ILMN_1676440	440776	LOC440776	s	ns	ns	ns	ns	ns	ns	ns	ns	ns	ns	ns	ns	ns	ns	ns
ILMN_1676503	643446	LOC643446	s	ns	ns	ns	ns	ns	ns	ns	ns	ns	ns	ns	ns	ns	ns	ns
ILMN_1676515	3614	IMPDH1	s	ns	ns	ns	ns	ns	ns	ns	ns	ns	ns	ns	ns	ns	ns	ns
ILMN_1676523	55297	CCDC91	s	ns	ns	ns	ns	ns	ns	ns	ns	ns	ns	ns	ns	ns	ns	ns
ILMN_1676548	28969	BZW2	s	ns	ns	ns	ns	ns	ns	ns	ns	ns	ns	ns	ns	ns	ns	ns
ILMN_1676555	79989	TTC26	s	ns	ns	ns	ns	ns	ns	ns	ns	ns	ns	ns	ns	ns	ns	ns
ILMN_1676611	29085	PHPT1	s	ns	ns	ns	ns	ns	ns	ns	ns	ns	ns	ns	ns	ns	ns	ns
ILMN_1676625	26039	SS18L1	s	ns	ns	ns	ns	ns	ns	ns	ns	ns	ns	ns	ns	ns	ns	ns
ILMN_1676718	976	CD97	s	ns	ns	ns	ns	ns	ns	ns	ns	ns	ns	ns	ns	ns	ns	ns
ILMN_1676759	55661	DDX27	s	ns	ns	ns	ns	ns	ns	ns	ns	ns	ns	ns	ns	ns	ns	ns
ILMN_1676763	NA	PIPSL	s	ns	ns	ns	ns	ns	ns	ns	ns	ns	ns	ns	ns	ns	ns	ns
ILMN_1676765	NA	LOC390354	s	ns	ns	ns	ns	ns	ns	ns	ns	ns	ns	ns	ns	ns	ns	ns
ILMN_1676792	645138	LOC645138	s	ns	ns	ns	ns	ns	ns	ns	ns	ns	ns	ns	ns	ns	ns	ns
ILMN_1676844	9975	NR1D2	s	ns	ns	ns	ns	ns	ns	ns	ns	ns	ns	ns	ns	ns	ns	ns
ILMN_1676846	6059	ABCE1	s	ns	ns	ns	ns	ns	ns	ns	ns	ns	ns	ns	ns	ns	ns	ns
ILMN_1676891	23097	CDC2L6	s	ns	ns	ns	ns	ns	ns	ns	ns	ns	ns	ns	ns	ns	ns	ns
ILMN_1676899	55689	YEATS2	s	ns	ns	ns	ns	ns	ns	ns	ns	ns	ns	ns	ns	ns	ns	ns
ILMN_1676905	91151	TIGD7	s	ns	ns	ns	ns	ns	ns	ns	ns	ns	ns	ns	ns	ns	ns	ns
ILMN_1676924	919	CD247	s	ns	ns	ns	ns	ns	ns	ns	ns	ns	ns	ns	ns	ns	ns	ns
ILMN_1676938	649214	LOC649214	s	ns	ns	ns	ns	ns	ns	ns	ns	ns	ns	ns	ns	ns	ns	ns
ILMN_1676946	10947	AP3M2	s	ns	ns	ns	ns	ns	ns	ns	ns	ns	ns	ns	ns	ns	ns	ns
ILMN_1676986	9284	NPIP	s	ns	ns	ns	ns	ns	ns	ns	ns	ns	ns	ns	ns	ns	ns	ns
